# Supplementary material
Source: Elsevier journal article supplement (https://www.sciencedirect.com/science/article/pii/S0210569119301925)

# **Guía de Práctica Clínica Basadas en la Evidencia Para el**

## **Manejo de la Sedo-Analgesia y Delirium en el Paciente**

### **Adulto Críticamente Enfermo**

E. Celis-Rodríguez<sup>a,\*</sup>, J.C. Díaz Cortés<sup>b</sup>, Y.R. Cárdenas Bolívar<sup>c</sup>, J.A. Carrizosa Gonzalez<sup>d</sup>,  
D-I. Pinilla<sup>e</sup>, L.E. Ferrer Zaccaro<sup>f</sup>, C. Birchenall<sup>g</sup>, J. Caballero López<sup>h</sup>, B.M. Argüello<sup>i</sup>, G.  
Castillo Abrego<sup>j</sup>, G. Castorena Arellano<sup>k</sup>, C. Dueñas Castell<sup>l</sup>, J.M. Jauregui Solórzano<sup>m</sup>, R.  
Leal<sup>n</sup>, J.M. Pardo Oviedo<sup>o</sup>, M. Arroyo<sup>p</sup>, F. Raffán-Sanabria<sup>q</sup>, N. Raimondi<sup>r</sup>, R. Reina<sup>s</sup>, D.R.  
Rodríguez Lima<sup>t</sup>, J.I. Silesky Jiménez<sup>u</sup>, S. Ugarte Ubierno<sup>v</sup>, L.G. Gómez Escobar<sup>w</sup>, D.P.  
Díaz Aya<sup>w</sup>, C. Fowler<sup>x</sup>, J.L. Nates<sup>y</sup>

<sup>a</sup> Anestesiología y Medicina Crítica y Cuidado Intensivo, Departamento de Medicina Crítica y Cuidado Intensivo, Hospital Universitario Fundación Santa Fe de Bogotá, Universidad del Rosario, Universidad de Los Andes, Bogotá, Colombia

<sup>b</sup> Anestesiología, Medicina Crítica y Epidemiología, Clínica Marly JCG, Universidad del Rosario, Bogotá, Colombia

<sup>c</sup> Medicina Crítica y Cuidado Intensivo, Universidad del Rosario, Hospital Universitario Fundación Santa Fe de Bogotá, Colombia.

<sup>d</sup> Medicina Crítica y Cuidado Intensivo, Epidemiología, Universidad del Rosario, Hospital Universitario Fundación Santa Fe de Bogotá, Colombia

<sup>e</sup> Anestesiología, Medicina Crítica, Hospital Universitario Fundación Santa Fe de Bogotá, Hospital Mayor de Mederi, Bogotá, Colombia

<sup>f</sup> Anestesiología y Medicina Crítica, Universidad de Los Andes, Universidad El Bosque, Universidad del Rosario, Hospital Universitario Fundación Santa Fe de Bogotá, Colombia

<sup>g</sup> Medicina Interna y Cuidado Intensivo, Clínica Universitaria Colombia, Hospital Universitario Mayor-Mederi, Bogotá, Colombia

<sup>h</sup> Medicina Crítica y Cuidado Intensivo, Hospital Universitario Arnau de Vilanova, Barcelona, España

<sup>i</sup> Anestesiología y Medicina Crítica y Cuidado Intensivo, Hospital Central de Managua, Managua, Nicaragua

<sup>j</sup> Cirugía General, Medicina Crítica y Cuidado Intensivo. Pacífica Salud- Hospital Punta Pacífica, Panamá City, Panamá

<sup>k</sup> Anestesiología y Medicina Crítica, Hospital General Manuel Gea González, Anestesiología, Universidad Nacional Autónoma de México, Ciudad de México, México

<sup>l</sup> Neumología y Medicina Crítica, Universidad de Cartagena, UCI Gestión Salud, UCI Santa Cruz de Bocagrande, Federación Panamericana e Ibérica de Medicina Crítica y Terapia Intensiva, Cartagena, Colombia

<sup>m</sup> Medicina Crítica y Cuidado Intensivo Hospital Luis Vernaza de Guayaquil, Ecuador

<sup>n</sup> Anestesiología, Fundación Clínica Médica Sur, Ciudad de México, México

<sup>o</sup> Medicina Interna y Medicina Crítica y Cuidados Intensivos de la Universidad del Rosario, Filosofía de la Ciencia, Universidad del Bosque, Educación Médica en Hospital Universitario Mayor-Mederi, Unidad de Cuidados Intensivos Fundación Cardio-infantil, Universidad del Rosario, Bogotá, Colombia

<sup>p</sup> Medicina Crítica y Cuidado Intensivo, Servicio de Terapia Intensiva, Hospital Universitario de Caracas, Universidad Central de Venezuela, Centro Médico Docente La Trinidad, Caracas, Venezuela

<sup>q</sup>Anestesiología y Medicina Crítica, Universidad del Bosque, Universidad de Los Andes,  
Hospital Universitario Fundación Santa Fe de Bogotá, Colombia

<sup>r</sup>Medicina Crítica y Cuidado Intensivo, Hospital Juan A. Fernández, Buenos Aires, Argentina

<sup>s</sup>Medicina Crítica y Cuidado Intensivo Hospital Interzonal de Agudos General José de San  
Martín, Buenos Aires, Argentina

<sup>t</sup>Medicina de Emergencias y Medicina Crítica y Cuidado Intensivo Universidad del Rosario,  
Hospital Mayor Mederi, Bogotá Colombia,

<sup>u</sup>Medicina Crítica y Cuidado Intensivo Casa Hospital San Juan de Dios/ Hospital CIMA, San  
José, Costa Rica

<sup>v</sup>Medicina Interna y Medicina Crítica y Cuidado Intensivo Universidad Andrés Bello,  
Servicio de Paciente Crítico, Clínica INDISA, Red de Medicina Intensiva, Santiago de Chile,  
Federación Panamericana e Ibérica de Medicina Crítica y Terapia Intensiva, Santiago de  
Chile, Chile

<sup>w</sup>Medicina, Universidad de Los Andes, Hospital Universitario Fundación Santa Fe de  
Bogotá, Colombia

<sup>x</sup> Manager Research Services & Assessment, Research Medical Library, The University of  
Texas MD Anderson Cancer Center, Texas, USA

<sup>y</sup> Departamento de Medicina Crítica, Cuidado Intensivo y Terapia Respiratoria; Division de  
Anestesiología, Medicina Crítica, y Medicina del Dolor, The University of Texas MD  
Anderson Cancer Center, Texas, USA

**Autor para correspondencia:**

Edgar Celis, MD

Jefe de Departamento de Medicina Crítica y Cuidado Intensivo

Hospital Universitario Fundación Santa Fe de Bogotá,

Carrera 9, Calle 119

Expansión 4to piso, Departamento de Medicina Crítica

Universidad de Los Andes, Bogotá, Colombia

Correo electrónico: [edgarcelis.md@gmail.com](mailto:edgarcelis.md@gmail.com) (E. Celis-Rodríguez)

**Palabras Clave:**

Agitación; Analgesia; Bundle; ABCDEF; Cuidado Intensivo; Delirium; Dolor; Grado de Recomendación; Guía de práctica clínica; Medicina basada en la evidencia; Sedación.

## **Sección 1. BENEFICIOS DE LA SEDO- ANALGESIA**

**¿Cuáles son los beneficios a corto y largo plazo del adecuado manejo del dolor y la sedación en el paciente adulto críticamente enfermo?**

**A1. Se sugiere la adaptación de estrategias que promuevan primero la prevención del dolor, seguido del manejo analgésico en etapas tempranas de su aparición y en caso de requerirse la adición de agentes sedantes, usar la menor dosis efectiva.** Recomendación condicional, nivel de evidencia bajo.

**A2. Se recomienda la creación o adaptación de protocolos para el adecuado manejo del dolor y de la sedación promoviendo el uso de la analgo-sedación, sedación ligera o no sedación en una atención centrada en las necesidades del paciente, evitando el uso de benzodiacepinas.** Recomendación fuerte, nivel de evidencia moderado.

**A3. Se recomienda el uso de estrategias que permitan la apropiada evaluación y adherencia a protocolos de manejo del dolor y la sedación en todos los pacientes críticos.** Recomendación fuerte, nivel de evidencia bajo.

### **Justificación:**

Los beneficios a *corto plazo* son disminución del uso de opioides, menor estancia en UCI y hospitalaria, promoción del sueño y movilización temprana, mejor recuperación funcional, aumento de los días libres de ventilador y retorno más rápido del tránsito

gastrointestinal. Adicionalmente, hay una mejor comunicación de los pacientes con el personal y la familia, y mayor satisfacción por parte del paciente. (1–5)

A *largo plazo*, el adecuado manejo del dolor y la sedación se manifiesta en mejor calidad de vida y resultados clínicos con menor tasa de aparición de delirium, disminución de síndrome post-UCI (el cual se caracteriza por impedimentos físicos y cognitivos como deterioro de la ejecución, la memoria, la atención y la velocidad de procesamiento mental; así como, con morbilidades de salud mental que incluyen trastorno de estrés agudo, ansiedad, depresión y trastorno de estrés postraumático). Cuando se suman estrategias que disminuyen la presencia de delirium y agitación, se evidencia menor tasa de mortalidad y costos (6,7).

La principal ventaja que ofrece el buen manejo del dolor en UCI es la satisfacción por parte del paciente, que se ve reflejada en mejores resultados clínicos y psicológicos (8). Los pacientes con un nivel aceptable de dolor son más tolerantes a la re-activación física de forma temprana, lo que mejora la capacidad funcional, reduce el des-acondicionamiento físico, la necesidad de soporte ventilatorio, la duración de la estancia en UCI y las tasas de mortalidad (1),(2),(3).

Los pacientes que se sienten cómodos en la UCI, tienen mejor comunicación con el personal y con la familia, colaboran con el tratamiento médico, duermen mejor, se aíslan menos (4), y presentan una menor frecuencia de síndrome post-UCI, depresión, dolor crónico y trastorno de estrés postraumático (5).

Para lograr un tratamiento analgésico y sedante efectivo, actualmente el enfoque “*analgesia primero*” o “*analgo-sedación*” cuyo objetivo principal es abordar el dolor y la incomodidad primero mediante la administración de analgésicos, y solo si se requiere, luego

de una adecuada titulación, se adiciona un agente ansiolítico-sedante a dosis mínimas necesarias para llegar a la meta analgésica establecida, ha tenido mayor aceptación y mejores resultados que el enfoque de sedación basada en hipnóticos. (9–11).

Desde la publicación de las guías pasadas, es bien conocido que estos últimos fármacos, principalmente las benzodiacepinas se relacionan con mayor probabilidad de desarrollar delirium y su presencia es un factor de riesgo independiente para estancia prolongada en UCI y hospitalaria e incremento en la tasa de mortalidad. (12). Otros efectos adversos asociados a su uso prolongado son hipotensión, acidosis metabólica y retraso en la extubación por efecto sedante prolongado (13). Por el contrario, reducir el uso de benzodiacepinas en la UCI ha mostrado ser seguro, facilitando la realización del examen físico mental, produciendo mayor bienestar en el paciente, mejor precisión en el diagnóstico de delirium y potencialmente reducción de la mortalidad en pacientes críticos. (14)

Otro punto importante es la prevención del dolor, numerosos estudios reportan la existencia de circunstancias durante la estancia del paciente en la unidad que causa mucho dolor y pueden pasar desapercibidas por los médicos o cuidadores. Ciertos procedimientos son bien identificados como causales o disparadores de dolor como lo son las intervenciones quirúrgicas o curación de heridas; sin embargo, aquellos relacionados con las actividades derivadas de los cuidados de enfermería como la movilización, succión del tubo oro traqueal, retiro de tubo de toracotomía, canalización de línea arterial, realización de drenajes o toma de gases arteriales entre otros (15) , son menospreciados por el personal a cargo del cuidado y señalados como generadores de dolor incapacitante, desagradable e incómodo por parte de los pacientes. (16)

El uso de protocolos integrados enfocados en el manejo del dolor, el delirium y la agitación que buscan mantener grados de sedación ligera, movilización temprana y uso restringido para medicamentos que causen delirium, han mostrado ser seguros en la UCI. Además, disminuyen los efectos adversos a largo plazo en los pacientes y su familia, con una reducción significativa de los costos (7) (17).

Dentro de las nuevas estrategias para el control del dolor en pacientes críticos, el uso de la analgesia regional en cirugía abdominal y pacientes de trauma se ha relacionado con mejor control de dolor postoperatorio, mayor rehabilitación, menor uso de opioides intravenosos en infusión continua, retorno más rápido del tránsito intestinal, descenso de complicaciones, días de estancia en UCI y en hospitalización general (18).

La agitación y la ansiedad ocurren con frecuencia en pacientes críticamente enfermos y se asocian con resultados clínicos adversos (19,20) . Es ampliamente conocido que el uso de la sedación profunda se relaciona con peores desenlaces e incluso con disminución de la sobrevida. El estudio de Shehabi y cols, mostró que el uso de sedación profunda durante las primeras 48 horas en pacientes con ventilación mecánica invasiva se asoció con retraso en la extubación y aumento de la mortalidad a los 3 meses (21). Con el fin de proporcionar un adecuado manejo, es primordial identificar y tratar oportunamente las posibles causas subyacentes como dolor, delirium, hipoxemia, hipoglucemia, hipotensión o síndromes de abstinencia. Para reducir la ansiedad y facilitar la adaptación a la UCI, hay que proporcionar comodidad al paciente, analgesia adecuada, reorientación frecuente, optimización del entorno y mantener los patrones normales de sueño y vigilia antes de administrar sedantes.

**¿Cuál es el beneficio de usar protocolos de sedación, delirium y analgesia?**



Respuesta:

**A4. Se sugiere el uso de protocolos de evaluación y manejo de la analgesia, agitación y delirium para mejorar los desenlaces tales como el adecuado control del dolor, disminución de los episodios de agitación y delirium, menor exposición a medicamentos, menor tiempo en ventilación mecánica y estancia en la UCI y hospitalización.**

Recomendación condicional. Calidad de la evidencia moderada.

**Justificación:**

La implementación y cumplimiento de protocolos, guiados con escalas para la adecuada evaluación del dolor y la agitación/sedación, basado en estrategias farmacológicas y no farmacológicas, junto con una práctica de movilización temprana y promoción del sueño, han demostrado mejor control del dolor, disminución de episodios de agitación y delirium y menor exposición innecesaria a medicamentos analgésicos y sedantes. Estos protocolos han impactado además en disminuir eventos adversos y el tiempo en ventilación mecánica, estancia en UCI y en hospitalización. (1-4) (6-15).

Los protocolos encontrados en los estudios son diversos y los diseños también lo son, desde estudios retrospectivos, ensayos clínicos hasta meta análisis. Los mejores resultados iniciales (27) son los que implementaban la interrupción diaria de la sedación (25), la sedación guiada por enfermería (22,23,35) y los que comenzaron a hacer énfasis en la importancia de abordar primero el dolor (14,26,28,29,31) y la sedación ligera (12,32). Luego con la práctica de la sedación protocolizada y el uso de propofol o dexmedetomidina en vez de benzodiacepinas, se evidenció que la interrupción diaria no agregaba mayor beneficio (36,37). Posteriormente se empezó a reconocer la importancia de la movilización temprana (38,39), la promoción de

las respiraciones espontáneas (30,40), la prevención, detección y manejo del delirium (33,41,42), y más recientemente la promoción del sueño natural (43,44) y la integración de la familia (45,46) en el cuidado del paciente. Los beneficios han llegado a impactar incluso en disminución de costos (6), morbilidad (23) y mortalidad (12,34,41,45).

## **Sección 2. SEDACIÓN**

### **A. Estrategias de la sedación**

**¿Cuál es el manejo de la sedación recomendado en pacientes adultos con sepsis y shock séptico?**

**A1. Se sugiere utilizar sedación ligera siempre que sea posible en pacientes que necesiten ser acoplados a ventilación mecánica, evaluación periódica del estado neurológico y usar escalas de sedación según objetivos individualizados. No usar sedación profunda de manera rutinaria.** Recomendación condicional, nivel de evidencia bajo.

#### **Justificación:**

Kawazoe y cols. (47), evaluaron si una estrategia de sedación con dexmedetomidina puede mejorar los resultados clínicos en pacientes sépticos sometidos a ventilación mecánica. No se encontró mejoría estadísticamente significativa en la mortalidad o los días libres de ventilación mecánica. Sin embargo, en el análisis de subgrupos del ensayo clínico controlado, MENDS (48), los pacientes sépticos fueron aleatorizados para recibir sedación con dexmedetomidina o lorazepam hasta por 5 días. Se encontró que quienes recibieron

dexmedetomidina tenían más días libres de delirium y ventilación mecánica y era menos probable que fallecieran que aquellos que recibieron lorazepam (HR 0.3, IC 0.1-0.9,  $p=0.03$ ).

Con respecto al uso de propofol en pacientes sépticos, Abdelmalik y cols. (49), realizaron un estudio retrospectivo en un solo centro, encontrando que puede aumentar el riesgo de polineuropatía adquirida en UCI, posiblemente por inactivación de los canales de sodio. Marler J y cols. (50) en un estudio piloto con pacientes sépticos ventilados, buscaron determinar si el propofol en infusión continua influía en el requerimiento de vasopresores sin encontrar diferencias estadísticamente significativas. Yu T y cols. (51) encontraron que al titular un nivel de sedación de 3 a 4 con la escala de Ramsay, el propofol aumentó el requerimiento de volumen para mantener la precarga.

**¿En los pacientes adultos críticamente enfermos que no tienen soporte ventilatorio, cuál es el manejo de la sedación más adecuado?**

**A2. Se sugiere en los pacientes sin intubación oro traqueal y sin soporte ventilatorio usar fármacos como la dexmedetomidina a bajas dosis, que tienen bajo riesgo de producir depresión respiratoria y efectos adversos hemodinámicos graves. Se debe monitorizar el nivel de sedación.** Recomendación condicional, nivel de evidencia bajo.

**Justificación:**

En este grupo de pacientes no existen ensayos clínicos controlados que estén a favor o en contra de usar sedación en los pacientes que no tienen soporte ventilatorio. En caso de ser necesario se debe contar con personal entrenado en el manejo de la vía aérea dadas las

posibles complicaciones que pueden presentar los fármacos, usar los mismos que en pacientes ventilados, realizando una monitorización continúa para identificar la posibilidad de depresión respiratoria. (52). La seguridad de la dexmedetomidina se ha evaluado en pacientes no intubados, comparándola con midazolam, reduciendo los días de duración en UCI. (53)

## **B. Bundle ABCDEF**

**¿Qué impacto tiene la aplicación del protocolo ABCDEF en el paciente críticamente enfermo?**

**B1. Se recomienda la aplicación del protocolo ABCDEF en el paciente crítico para aumentar los días libres de delirium y días libres de estado de coma, disminuir el tiempo de soporte ventilatorio, la estancia en cuidados intensivos y mortalidad. Recomendación fuerte, nivel de evidencia bajo.**

### **Justificación:**

El paquete (*bundle*) “ABCDE” fue descrito inicialmente por Morandi y cols (54) como un enfoque integrado e interdisciplinario para el manejo de pacientes ventilados mecánicamente en busca de disminuir la incidencia de delirium, acortar el tiempo de soporte ventilatorio y estancia en UCI. Esta sigla deriva de sus componentes escritos en inglés: -A: *Awaking* (prueba diaria de despertar) -B: *Breathing Trial* (prueba de respiraciones espontáneas) – C: *Choice* (selección de sedantes y analgésicos que menos se asocien a delirium) –D: *Delirium* (Detección y manejo de delirium), –E: *Early mobilization* (inicio de movilización lo más temprano posible).

Balas MC y cols (55) en un estudio clínico de cohorte de antes y después en 5 UCIs de adultos con 187 pacientes en soporte ventilatorio encontraron que posterior a la implementación del *bundle* ABCDE, los pacientes pasaron tres días más respirando sin asistencia mecánica comparados con aquellos en el período anterior a la implementación (mediana 24 [7 a 26] versus 21 [0 a 25];  $p=0.04$ ), disminuyó la incidencia de delirium (pre 62.3% vs. Post 48.7%;  $p = 0.02$ ), disminuyó la tasa de mortalidad hospitalaria del 19.9% en el período anterior a la implementación a 11.3% en el período post-implementación con un *odds ratio* (OR) de 0.56 (IC 95% 0.28-1.10;  $p=0.09$ ). Después de ajustar por edad, sexo, gravedad de la enfermedad, comorbilidad, y estado de la ventilación mecánica, los pacientes manejados con el ABCDE experimentaron una reducción a casi la mitad de la probabilidad de desarrollar delirium (OR, 0.55; IC del 95%, 0.33-0.93;  $p=0.03$ ) y mayor probabilidad de movilizarse fuera de la cama, al menos una vez durante la estadía en la UCI (OR, 2.11; IC 95%: 1.29-3.45;  $p=0.003$ ). Klompas cols. (56) en un estudio prospectivo colaborativo para valorar la prevención de eventos asociados a la ventilación (EAV), mostró que el uso del ABC se asoció a un 37% menos de eventos asociados con el ventilador (OR, 0.63; IC 95%: 0.42-0.97) y un 65% menos en las complicaciones infecciosas relacionadas con la ventilación mecánica (OR, 0.35; IC 95%: 0.17-0.71). Trogrlic y cols (57) realizaron una revisión sistemática sobre la implementación de medidas basadas en las guías americanas ASD y el ABCDE, reportando una reducción de la mortalidad (RR 0.81; IC: 0.68 a 0.96) y estancia en UCI (-1.71 días; IC: -2.45 a -0.98).

Posteriormente, se integró a este *bundle* la “F” (*family* = familia) para promover la participación activa de los integrantes de la familia en el cuidado del paciente crítico (58), completándose el “ABCDEF”, el cual fue vinculado al concepto de “Liberación de UCI” que

se basa en el cuidado centrado en el paciente y la familia. En el ABCDEF, la A se convierte en evaluación, prevención y manejo del dolor (*Assessment*), la B se convierte en prueba de despertar y respiraciones espontáneas (*Both*), la C sigue siendo selección de analgésicos y sedantes con menor impacto en delirium (*Choice*), la D continúa siendo prevención, diagnóstico y manejo del delirium (*Delirium*), la E movilización temprana (*Early*) y la F es compromiso y empoderamiento de la familia (*Family*). La aplicación del *bundle* tiene varias limitaciones y requiere de un trabajo interdisciplinario en equipo con compromiso y disponibilidad de recursos (57).

Los resultados de los estudios del uso del ABCDEF varían debido a que no siempre se aplican todos los componentes del *bundle* o se aplican en diferente intensidad y frecuencia. El principal reporte de este *bundle* lo hacen Barnes y cols (45) en un estudio de cohorte prospectivo en 7 hospitales con 6064 pacientes, encontrando que en los pacientes que no recibieron cuidados paliativos, por cada 10% de aumento en el cumplimiento del paquete total tuvieron un 7% más de probabilidad en la sobrevida hospitalaria (OR, 1.07; IC del 95%, 1.04-1.11;  $p<0.001$ ). Del mismo modo, por cada 10% de aumento en el cumplimiento parcial del paquete tuvieron una sobrevida hospitalaria 15% mayor (OR, 1.15; IC del 95%, 1.09-1.22;  $p<0.001$ ). Después de ajustar por edad, gravedad de la enfermedad y presencia de ventilación mecánica, el mayor cumplimiento del paquete se asoció de forma independiente a una mayor sobrevida y más días sin delirium y libres de coma, tanto con el cumplimiento total del paquete (tasa de incidencia, 1.02, IC 95%, 1.01-1.04,  $p=0.004$ ) como con el cumplimiento parcial (tasa de incidencia, 1.15; IC 95%, 1.09-1.22;  $p<0.001$ ).

**¿Cuál es el beneficio de la presencia de los familiares en el desenlace del paciente adulto crítico?**

**B2. Se sugiere la presencia, participación y preparación de la familia en el plan de cuidados del paciente crítico como una medida para el soporte psicosocial**  
Recomendación condicional, nivel de evidencia bajo.

***Justificación:***

La familia puede desempeñar un papel destacado en los cuidados del paciente crítico. Sin embargo, el impacto que esto tiene sobre desenlaces intermedios (seguridad, emociones, bienestar, comodidad, recuperación psicológica, entre otros) es variable y el impacto en desenlaces clínicos importantes (estancia en UCI, tiempo de ventilación mecánica y mortalidad, entre otros) no ha sido consistentemente demostrado.

La propuesta de incluir tanto a las familias en la atención y cuidados de los pacientes fue presentada por primera vez por *The Picker Institute* en 1988. Desde ese momento hasta ahora, la inclusión familiar se ha convertido en un modelo de colaboración entre pacientes, familias y proveedores de atención médica. En 2004, el Instituto para el cuidado centrado en la familia definió este método como un "enfoque innovador para la planificación, ejecución y evaluación de la salud que se basa en asociaciones mutuamente beneficiosas entre pacientes, familias y proveedores de atención médica" (59).

Aunque existe una gran cantidad de literatura relacionada con el Cuidado Centrado en el Paciente y la Familia (CCPF), ésta se encuentra poco conceptualizada y es difícil de implementar. El CCPF se basa en la interacción entre el paciente, la familia y el proveedor de atención médica. Las horas de visita abiertas no implican abrir las puertas y permitir la entrada de cualquier persona en cualquier momento. El paciente debe definir quién es su familia y cuándo quiere que lo visiten (60). Los familiares pueden alimentar al paciente,

proporcionar apoyo emocional y participar en actividades de baño. La participación en estas tareas depende de lo que el paciente quiera y de lo que el miembro de la familia esté dispuesto a hacer. La preparación de las familias antes de entrar en la UCI es básica para el CCPF y la familia no debe considerarse un visitante en la vida del paciente, sino un integrante más del grupo de atención (61).

Powers y cols, en un estudio descriptivo llevado a cabo en tres UCIs, aplicaron un programa de educación al personal de UCI que los empoderaba para fomentar la participación del paciente y su familia en el cuidado. Posteriormente, evaluaron su impacto, encontrando un incremento del 51% al 80% en la satisfacción de los pacientes y la relación paciente-enfermera fue mejor (62). Beth Happ y cols, en un estudio descriptivo, evaluaron el impacto de la presencia de la familia durante el proceso de retiro de la ventilación mecánica en pacientes sometidos a ésta por tiempo prolongado y mostraron pruebas de retiro diarios significativamente más largos cuando las familias estaban presentes ( $p < 0.0001$ ) (63).

Hupcey y Zimmerman entrevistaron a 45 pacientes adultos después de 3 a 30 días en UCI médicas o quirúrgicas para describir sus necesidades psicosociales y el comportamiento de las familias, amigo y personal que ayudaron o dificultaron la satisfacción de estas necesidades. Los pacientes identificaron la presencia de familiares y amigos como apoyo (por ejemplo, atentos, alentadores) y una influencia positiva para "sentirse seguros". Se considera que el poder terapéutico de la familia tiene el potencial de influir positivamente en la experiencia de la admisión en la UCI si se aprovecha y se usa con sensibilidad. Sin embargo, en este estudio también se reportaron los efectos psicosociales negativos de las visitas familiares. Los pacientes se angustiaron cuando los visitantes se retiraron u ocultaron información y cuando los visitantes estaban molestos o llorando al lado de la cama (64). En



otros estudios se han identificado los beneficios de incluir parientes en la atención del paciente, que incluyeron la mejora del bienestar psicológico de los pacientes y sus familiares (65,66).

Black y cols. en un estudio de intervención, con 170 pacientes críticos, encontraron que la participación de la familia en la atención psicológica del paciente no redujo significativamente la incidencia de delirium, pero los pacientes que recibieron la intervención mostraron una mejor recuperación psicológica y bienestar que el grupo control a las 4, 8 y 12 semanas después del ingreso a la UCI ( $p=0.001$ ). Aunque los resultados mostraron que menos pacientes (29% vs 77%) en el grupo de intervención obtuvieron 4 o más puntos en el *intensive care delirium screening checklist* (ICDSC), no se demostraron diferencias significativas en el desenlace clínico, concluyeron que la participación de la familia en la atención psicológica no reduce la incidencia de delirium en los pacientes durante su estancia en la UCI (46).

Mitchell y cols. (67) en una revisión integrativa encontraron en algunos estudios que la participación de la familia puede tener un impacto positivo en algunos desenlaces como: fortalecimiento emocional, proceso de toma de decisiones, satisfacción por parte de los pacientes y los familiares, entre otros. Dahle y cols. en un estudio descriptivo cualitativo en 11 pacientes críticamente enfermos encontraron que los pacientes deseaban cierta limitación de la presencia de los visitantes y preferían visitas de aquellos que estaban más cerca de su vida diaria, las visitas podían generar estrés y preocupaciones en los pacientes. Todo este proceso durante la estancia en la UCI, coloca a las familias en una mejor posición para brindar apoyo a los pacientes durante la recuperación (68).

En resumen, la familia puede tener un impacto positivo o negativo en varios desenlaces intermedios (seguridad, emociones, bienestar, comodidad, entre otros), lo cual dependerá de la educación y preparación suministrada, la relación previa del paciente con ese familiar y de la relación entre familia y personal de salud. No existe un ideal de cuánto tiempo debe estar el familiar al lado del paciente, pero se sabe que puede ser valioso que comparta tiempo con el paciente, el cual debe ser de buena calidad a través del tacto, habla, cuidados básicos y terapia, entre otros. En otras palabras, la presencia de la familia soporta el CCPF y potencialmente, puede generar impacto en desenlaces clínicos importantes, aunque hasta la fecha no se disponen de estudios de alta calidad que lo evalúen. Es importante destacar que para un individualizado y exitoso CCPF se requiere de un compromiso y participación de los profesionales de la salud, pacientes y familia.

### **¿Cuál es el beneficio de la movilización temprana en los pacientes adultos críticos?**

**B3. Se recomienda que a todo paciente en cuidado intensivo se le realice movilización pasiva y una vez su estado clínico lo permita será candidato a movilización activa.**  
Recomendación fuerte, nivel de evidencia moderado.

**B4. Se recomienda la movilización temprana en todo paciente quirúrgico que esté en ventilación mecánica por lo menos 48 horas. Esta debe ser basada en un protocolo institucional que involucre a médicos, enfermeras y terapeutas.** Recomendación fuerte, nivel de evidencia moderado.

**B5. Se recomienda la movilización temprana en todo paciente en POP de cirugía cardiaca de revascularización coronaria o cambio valvular hemodinámicamente estable.** Recomendación fuerte, nivel de evidencia moderado.

**Justificación:**

En pacientes en ventilación mecánica el área transversal del músculo esquelético disminuye 12,5% después de una semana en la UCI (69). El reposo en cama en la UCI es un factor de riesgo para debilidad muscular a largo plazo. Un estudio longitudinal prospectivo le hizo seguimiento a 222 pacientes con SDRA a los 3, 6, 12 y 24 meses y encontró disminución de 3 a 11% en la fuerza muscular por cada día adicional de reposo en cama (70). La debilidad adquirida en UCI es definida como la presencia de debilidad detectada clínicamente en pacientes sin otra posible etología más que la enfermedad crítica (71). Su presencia se asocia a neumonía asociada al ventilador, falla respiratoria recurrente, aumento de la estancia hospitalaria y de la mortalidad (72,73). Por esto, la movilización temprana y la rehabilitación del paciente crítico juegan un papel importante en la prevención de estas comorbilidades.

La movilización pasiva se refiere a actividades y movimientos que se realizan en el paciente sin control voluntario y la movilización activa requiere participación del paciente y va desde movimientos asistidos hasta actividad independiente. Schaller y cols. en un estudio multicéntrico aleatorizado controlado demostraron que seguir un protocolo basado en movilización temprana mejora la movilidad funcional al alta de la UCI, disminuye tiempo de estancia en UCI y hospitalaria, y además mejora la independencia funcional al alta hospitalaria (74).

Santos y cols. en una revisión sistemática de más de 1400 pacientes en post operatorio de cirugía cardíaca demostraron que la movilización temprana se asocia a disminución en la estancia en UCI y hospitalaria, sin diferencias en cuanto a función pulmonar y calidad de vida, pero con mayor satisfacción del paciente (75).

La evidencia en la población general de UCI es controversial. Doiron y cols. en una revisión sistemática que incluyó 690 pacientes de estudios aleatorizados controlados, encontraron que no es posible determinar si la movilización temprana o ejercicio activo de pacientes en UCI mejora su habilidad para realizar actividades de la vida diaria, la fuerza muscular o la calidad de vida; sin embargo, parece ser una estrategia terapéutica segura (76). Tipping y cols. en una revisión sistemática de más de 1700 pacientes no encontraron disminución en la mortalidad del grupo de movilización temprana, pero sí mejoría en la fuerza al egreso de UCI, reducción de las limitaciones en la actividad física y mejoría en la calidad de vida a 6 meses (77). Los protocolos de movilización temprana en cada institución y estudio son muy diversos, por esta razón la comparación de los resultados de los distintos estudios es difícil. Se deben estandarizar estos protocolos para poder definir cuál es el papel de la terapia y su impacto clínico (78). El tiempo de duración de la terapia aún está por definirse (79).

Algunos estudios demuestran que la movilización temprana tiene muy buenos desenlaces, pero se debe tener precaución con los pacientes con altos requerimientos de fracción inspirada de oxígeno  $> 0,6$ , saturación  $< 90\%$ , necesidad de modos ventilatorios no convencionales (VAFO, APRV, Prono), PEEP  $> 10$  cm H<sub>2</sub>O, medicación antihipertensiva endovenosa por emergencia hipertensiva, hipotensión sintomática, alto requerimiento de soporte vasopresores, arritmias que requieran manejo médico, sedación con

RASS > 2 o agitación importante, hipertensión endocraneana que requiera manejo médico, crisis convulsivas no controladas, sangrado activo, fracturas no fijas y tórax o abdomen abiertos (38,80).

### **C. Recomendaciones para el uso y duración de agentes sedantes.**

**¿Existe relación entre la dosis y el tiempo de uso de las benzodiacepinas y sus efectos adversos en pacientes críticamente enfermos?**

**C1. Se sugiere evitar el aumento de dosis nocturnas de midazolam, prefiriendo el uso de no-benzodiacepinas.** Recomendación condicional, nivel de evidencia bajo.

#### **Justificación:**

El aumento de las dosis de benzodiacepinas y la profundidad de sedación nocturna, aumentan el riesgo de extubaciones fallidas, menos éxito en las pruebas de respiración espontánea y aumenta el riesgo de delirium. Este fenómeno no se observa con propofol y dexmedetomidina, las cuales serían preferibles. Seymour y cols. (81), estudiaron en una cohorte prospectiva durante dos años a 140 pacientes que requirieron ventilación mecánica al menos por 12 horas, midiendo las dosis horarias de benzodiacepinas y propofol durante el día (7 am a 11 pm) y la noche (11pm a 7am). En las noches se registró un aumento del 40% en los que recibían midazolam y del 41% en los de propofol. El incremento en las dosis nocturnas de benzodiacepinas se asoció con menor probabilidad de éxito en las pruebas de respiración espontánea (OR 0.4 IC95% 0.2 – 0.8,  $p<0.01$ ), y un mayor riesgo de delirium ( $p=0.05$ ). El aumento de las dosis nocturnas de propofol no tuvo cambios significativos sobre las pruebas de respiración espontánea (OR 0,8 IC95% 0.5–1.4,  $p=0.43$ ), ni aumentó significativamente el riesgo de delirium ( $p=0.06$ ).

**C2. Si se utiliza sedación con midazolam, se sugiere utilizar sedación ligera en vez de sedación profunda, para evitar recuerdos delirantes y no afectar la memoria implícita.**

Recomendación condicional, nivel de evidencia bajo.

**Justificación:**

La sedación profunda con benzodiacepinas produce recuerdos delirantes y afecta la memoria implícita, la cual no es afectada con la sedación ligera por éstas mismas. Con la intención de evitar los recuerdos se ha recurrido a medicamentos amnésicos. Sin embargo, éstos últimos podrían también producir recuerdos delirantes. Burry y cols. (82) publicaron un estudio realizado en una cohorte prospectiva de 289 pacientes sedados con benzodiacepinas, a los que se evaluó mediante una herramienta de memoria a los días 3, 28 y 90 post-UCI, comparando las características de los pacientes con o sin recuerdo de la UCI, con o sin memorias delirantes. La presencia de recuerdos delirantes fue del 70% a los 28 días, pero no estuvieron relacionados con la presencia de delirium ( $p=0.84$ ) ni con el estatus de recordar ( $p=0.15$ ), aunque si fue asociada con haber permanecido más tiempo en ventilación mecánica ( $p=0.04$ ).

La memoria explícita es la evocación consciente e intencional de información y experiencias previas y es fácilmente afectada por medicamentos que producen amnesia, mientras que la memoria implícita se encarga de nuestras actividades automáticas e inconscientes que han sido previamente aprendidas y es más difícil de afectar, como en las lesiones neurológicas. Tian y cols. (83) evaluaron mediante imagen de resonancia magnética funcional el efecto del midazolam sobre la memoria explícita e implícita a niveles de sedación leve y profunda. Al nivel leve de sedación (OAAS 3) se afectó la memoria explícita

pero no la implícita, mientras que a nivel profundo (OAAS 1) sí se afectaron ambas memorias ( $p < 0.05$ ).

**C3. Cuando se utilice midazolam durante el manejo de la sedación en el paciente crítico, se sugiere evitar su uso en infusión continua y preferir los bolos intermitentes.** Recomendación condicional, nivel de evidencia bajo.

**C4. Se sugiere evitar la sedación profunda con el uso de midazolam.** Recomendación condicional, nivel de evidencia moderado.

**C5. Se recomienda evitar la administración de benzodiazepinas en pacientes con alto riesgo de delirium.** Recomendación fuerte, nivel de evidencia alto.

#### **Justificación:**

Las benzodiazepinas habían sido la base de la sedación en el paciente crítico, pero dados sus efectos adversos se han venido dejando de recomendar en la mayoría de las situaciones. No obstante, aun hacen parte de las alternativas farmacológicas disponibles con algunas indicaciones y de usarse, se prefieren en bolos intermitentes ocasionales en vez de infusión continua, evitando usarlas para sedación profunda y evitando usarlas en pacientes con alto riesgo de delirium.

En una cohorte de 1112 pacientes, Zaal y cols. (84) evaluaron la asociación entre la exposición a benzodiazepinas y la ocurrencia de delirium, encontrando que la administración de éstas en un paciente despierto sin delirium se asoció con un aumento del riesgo de delirium al día siguiente, OR 1.04 (IC95% 1.02 – 1.05,  $p < 0.001$ ), por cada 5 mg de dosis equivalentes de midazolam. Este riesgo es mayor cuando se administran en infusión continua OR 1.04

(IC95% 1.03 – 1.06,  $p<0.001$ ) que cuando se dan intermitentemente OR 0.97 IC95% 0.88 - 1.05,  $p=0.44$ ).

En el estudio de Seymour y cols. (81) antes mencionado, se observó también un incremento proporcional en la probabilidad de delirium según aumenta la dosis de benzodiacepinas, siendo de 17%, 65% y 97% con 0.1 y 2 mg/h respectivamente de dosis equivalentes de lorazepam. Igualmente, este incremento en la dosis diaria de benzodiacepinas se asoció con menor probabilidad de éxito en las pruebas de respiración espontánea ( $p<0.01$ ), lo cual no sucedió con el incremento en las dosis diarias de propofol ( $p=0.09$ ).

Para comparar el uso de midazolam solo, versus midazolam con dexmedetomidina en pacientes agitados en retiro de la ventilación mecánica, Lu y cols. (85) realizaron un ensayo clínico en el que encontraron mayor prevalencia de delirium post-extubación con el midazolam solo (45% vs 20%,  $p=0.017$ ), y un mayor tiempo de extubación ( $3.0 \pm 1.5$ ) días vs ( $4.3 \pm 2.2$ ) días,  $p < 0.05$ , de estancia en UCI ( $5.4 \pm 2.1$ ) días vs ( $8.0 \pm 1.4$ ) días,  $p < 0.05$ , y de hospitalización ( $10.1 \pm 3.0$ ) día vs ( $15.3 \pm 2.6$ ) días,  $p < 0.05$ .

En el meta-análisis de 16 ensayos clínicos realizado por Constantin y cols. y publicado en 2016 (86), el uso de dexmedetomidina comparado con benzodiacepinas y propofol fue asociado con una reducción en la incidencia de delirium (RR = 0.812, IC95% 0.680 - 0.968,  $p=0.02$ ). Se revisa más sobre delirium, benzodiacepinas y otros factores de riesgo en una sección específica de esta guía.

**¿Cuándo utilizar las benzodiacepinas en el paciente críticamente enfermo sin abstinencia a alcohol?**



**C6. Se sugiere el uso de midazolam, antes que tiopental como parte del manejo del estatus convulsivo refractario.** Recomendación condicional, nivel de evidencia bajo.

**Justificación:**

Además del uso de anticonvulsivantes, los barbitúricos han sido utilizados en el tratamiento del estatus convulsivo refractario. El midazolam a dosis altas ha mostrado ser tan efectivo como el tiopental, pero con menos efectos adversos. Bellante y cols. (87) en un estudio retrospectivo durante cuatro años compararon la efectividad y seguridad de estos dos medicaciones, incluyendo 33 pacientes donde 19 recibieron midazolam y 14 tiopental en estatus convulsivo refractario, además de estar recibiendo en promedio otros dos a tres anticonvulsivantes. La efectividad en el control del estatus fue similar (63% vs 64%,  $p=0.9$ ), pero los eventos adversos fueron más frecuentes con tiopental. Entre ellos: hipotensión con requerimiento de vasopresores (15% vs 57%,  $p=0.02$ ), infecciones (26% vs 64%,  $p=0.04$ ), leucopenia (16% vs 42%,  $p=0.04$ ), hiponatremia (0% vs 29%,  $p=0.02$ ) y anemia con requerimiento de transfusiones (16% vs 42%,  $p=0.04$ ). Además, los pacientes con midazolam tuvieron una menor estancia en la UCI (6 vs 15 días,  $p=0.02$ ) y un mejor puntaje en la escala de Glasgow a los 6 meses (8 vs 4,  $p=0.01$ ). En este estudio las dosis máximas administradas fueron 0.3 mg/kg/h de midazolam y 5,9 mg/kg/h de tiopental.

En el 2014 Fernández y cols. (88) habían publicado otro estudio retrospectivo durante 16 años incluyendo 129 pacientes, comparando dosis altas versus dosis bajas de midazolam. Los de dosis altas recibieron 0.4 mg/kg/h (rango intercuartil 0.2 a 1.0) y los de bajas 0.2 mg/kg/h (rango intercuartil 0.1 a 0.3). El uso de dosis altas se asoció con menor aparición de convulsiones al suspender la infusión (15% vs 64%, OR 0.10, IC95% 0.03 – 0.27) y con una menor mortalidad (40% vs 62%, OR 0.34, IC95% 0.13 - 0.92).

**C7. Se sugiere adicionar midazolam al uso de haloperidol para mejorar el control de la agitación en el paciente paliativo.** Recomendación condicional, nivel de evidencia bajo.

**Justificación:**

Para el control de la agitación en cuidado paliativo se han utilizado diferentes alternativas farmacológicas. (89) Gonçalves y cols. compararon en dos cohortes, el uso de haloperidol solo versus en combinación con midazolam. La combinación controló el 84% de los episodios de agitación con la primera dosis, mientras que el haloperidol solo controló el 64% ( $p=0.002$ ). El tiempo entre la primera dosis y el control de la agitación fue 15 minutos (rango entre 5 y 210) con la combinación y de 60 minutos (rango entre 10 y 430) con el haloperidol solo ( $p < 0.001$ ).

**¿Cuáles son los pacientes críticamente enfermos que más se benefician del uso de remifentanil?**

**C8. Se recomienda el uso de remifentanil en postoperatorio de cirugía cardíaca para disminuir el tiempo en ventilación mecánica.** Recomendación fuerte, nivel de evidencia moderado.

**Justificación:**

En general el uso de remifentanil comparado con otros opioides en cuidados intensivos, ha demostrado reducir significativamente el tiempo en ventilación mecánica, el tiempo entre la interrupción de la sedación hasta la extubación, y el tiempo en UCI. En un meta análisis de 23 ensayos clínicos publicado en *Critical Care* de 2017 por Zhu y cols. (90), el remifentanil se asoció con reducción en horas de ventilación mecánica, (diferencia media -1.46; IC95% -2.44 a -0.49), en el tiempo en horas entre la interrupción de la sedación hasta

la extubación (diferencia media -1.02; IC95% -1.59 a -0.46), y en los días de estancia en UCI (diferencia media -0.10; IC95% -0.16 a -0.03). No hubo diferencias significativas en los días de hospitalización (diferencia media -0.05; IC95% -0.25 a 0.15), costos (diferencia media -709.7; IC95% -1590.98 a 171.55), mortalidad (diferencia media -0.64; IC95% -1.33 a 0.06) ni agitación (diferencia media -0.71; IC95% -1.80 a 0.37).

En cuanto a cirugía cardíaca, Greco y cols. (91) realizaron un meta análisis de 16 ensayos clínicos donde se compara el remifentanil contra fentanil y sufentanil encontrando que el uso de remifentanil se asoció con una reducción en el tiempo en ventilación mecánica (diferencia media= -139 min, IC95% -244 a -32,  $p=0.01$ ); tiempo de hospitalización (diferencia media= -1.08 días, IC95% -1.60, a -0.57,  $p<0.0001$ ); y menor liberación de troponina-I (diferencia media= -2.08 ng/mL IC95% -3.93, a -0.24,  $p=0.03$ ). No se encontraron diferencias en mortalidad.

En un ensayo clínico realizado por Muellejans B y cols. (92) se aleatorizaron en el postoperatorio a 80 pacientes para recibir remifentanil + propofol versus fentanil + midazolam, encontrando disminución significativa con el uso de remifentanil + propofol en el tiempo en ventilación mecánica (20.7 h vs 24.2 h,  $p<0.05$ ) y estancia en UCI (46.1 h vs 62.4 h,  $p<0.05$ ). Los costos globales de estancia en la UCI fueron similares.

**C9. Se sugiere el uso de remifentanil junto a propofol para sedación durante hipotermia terapéutica después de paro cardíaco.** Recomendación condicional, nivel de evidencia bajo.

**Justificación:**

Bjelland y cols. (93) en un estudio realizado en Noruega, aleatorizaron 59 pacientes después de paro cardíaco para recibir sedación con remifentanil + propofol versus fentanil + midazolam durante hipotermia terapéutica por 24 horas. Los pacientes con remifentanil + propofol tuvieron un menor tiempo para terminación del efecto, (13.2 h IC95% 2.3–24 horas vs. 36.8 h IC95% 28.5–45.1 horas,  $p < 0.001$ ), un menor tiempo para extubación (0.25 h IC95% 0–0.72 horas vs. 12.7 h IC95% 0.5–26.4 horas,  $p = 0.002$ ), aunque necesitaron más norepinefrina (23 vs. 12 pacientes,  $p = 0.003$ ). El desenlace neurológico a los 3 meses fue similar en los dos grupos.

**C10. Se sugiere el uso de remifentanil en pacientes con insuficiencia renal para disminuir el tiempo en ventilación mecánica y estancia en UCI.** Recomendación condicional, nivel de evidencia bajo.

#### **Justificación:**

Un estudio realizado por Breen y cols. (29) comparó el uso de remifentanil hasta por 72 horas en pacientes críticos con depuración de creatinina  $\geq 50$  ml/min versus  $< 50$  ml/min, sin encontrar prolongación del efecto luego de 8, 24, 48 y 72 horas en cada grupo. La diferencia en terminación del efecto a las 72 horas de infusión en el grupo con deterioro renal moderado o severo fue de solo 16.5 minutos comparado con el grupo con deterioro renal leve o normal.

Belhadj y cols. (94) encontraron menor tiempo de extubación en los pacientes críticos con deterioro de la función renal sedados con remifentanil + midazolam versus fentanil + midazolam: 1.480 +/- 980 vs 2.880 +/- 1.280 min, ( $p = 0.04$ ), al igual que menor tiempo de

retiro de ventilación mecánica: 220 +/-164 vs 720 +/-480 min, ( $p=0.015$ ) con una incidencia de agitación similar.

**C11. Se sugiere el uso de remifentanil en pacientes neurocríticos para disminuir el tiempo de despertar y permitir su evaluación neurológica.** Recomendación

condicional, nivel de evidencia bajo.

**Justificación:**

Karabinis y cols. (95) realizaron un ensayo clínico multicéntrico en pacientes neurocríticos con lesión cerebral o en posoperatorio de neurocirugía, con requerimiento de ventilación mecánica de uno a cinco días y en quienes se necesitaba disminuir sedación para hacer evaluaciones neurológicas. Se aleatorizaron a recibir dos tipos de manejo: el primero estaba basado en analgesia con remifentanil al cual luego se titulaba la adición de sedación con propofol y midazolam (84 pacientes) y el segundo basado en la hipnosis con propofol y midazolam y la analgesia con fentanil (37 pacientes) o morfina (40 pacientes). La variabilidad en el tiempo de las valoraciones neurológicas entre pacientes fue significativamente menor usando remifentanil (remifentanil 0.44, versus fentanil 0.86,  $p=0.024$  versus morfina 0.98,  $p=0.006$ ). El tiempo para hacer una adecuada valoración neurológica fue significativamente más corto con remifentanil, 24 minutos versus fentanil, 42 minutos ( $p=0.001$ ), versus morfina 48 minutos ( $p<0.001$ ).

**C12. Se sugiere titular el uso de remifentanil a la mínima dosis efectiva posible, para disminuir la hiperalgesia asociada a su uso y posterior suspensión.** Grado de recomendación: fuerte. Recomendación condicional, nivel de evidencia bajo.

**Justificación:**

En el estudio de Belhadj antes mencionado (94), hubo más pacientes que requirieron morfina al suspender la sedación con remifentanil + midazolam que con fentanil + midazolam (78% vs 11%,  $p=0.013$ ). En este estudio el objetivo de sedación fue de 1 a 3 en la escala SAS (ligera a profunda), mientras que en un estudio de Muellejans y cols. (96), el objetivo de SAS fue 4 (despiertos). En un ensayo clínico con 152 pacientes, donde se comparó la sedación basada en la analgesia con remifentanil versus fentanil, no se encontraron diferencias significativas en el tiempo de extubación, posiblemente por las dosis bajas de propofol adicional que se usaron. Los pacientes con remifentanil permanecieron más tiempo con dolor durante la extubación (6.5% vs 1.4%;  $p=0.013$ ), post-extubación (10.2% vs 3.6%;  $p=0.001$ ) y post-tratamiento (13.5% vs 5.1%;  $p=0.001$ ). Las dosis de remifentanil y de fentanil fueron más altas en el estudio de Belhadj que en el de Muellejans. En una revisión sistemática realizada por Rivosecchi y cols. (97) se encontraron 16 artículos cuyos resultados apoyan la existencia de hiperalgesia inducida por remifentanil, mientras que otros 6 la refutan y 22 se enfocan en la prevención con: ketamina (con la mejor evidencia), magnesio, lidocaína, dexmedetomidina, AINES, pregabalina y adenosina, y el uso de analgesia transicional con otros opioides de larga duración como morfina, hidromorfona u oxicodona. Los autores sugieren titular y usar la menor dosis efectiva de remifentanil como estrategia primaria de prevención.

**¿Cuál es la asociación entre dosis y duración de uso de la dexmedetomidina y efectos adversos?**

## INICIO

**C13. Se recomienda evitar el uso generalizado de dosis de carga de dexmedetomidina en el paciente crítico.** Recomendación fuerte, nivel de evidencia alto.

**C14. Cuando se requiera utilizar dosis de carga, se sugiere utilizar dosis  $< 1\text{mcg/kg}$  y durante  $> 20$  min.** Recomendación condicional, nivel de evidencia bajo.

**C15. Se sugiere utilizar sedantes diferentes a dexmedetomidina cuando se requiera profundizar el paciente en vez de dosis de carga de ésta.** Grado de recomendación: débil. Recomendación condicional, nivel de evidencia bajo.

## MANTENIMIENTO

**C16. Se recomienda evitar dosis de mantenimiento  $> 1.4\text{ mcg/kg/h}$  y niveles de sedación profunda basadas en dexmedetomidina para evitar el riesgo de bradicardia severa.** Grado de recomendación: fuerte. Recomendación fuerte, nivel de evidencia moderado.

**C17. Se sugiere utilizar dosis mínimas de dexmedetomidina para sedación ligera durante mantenimiento, usualmente  $< 0.7\text{ mcg/kg/h}$ .** Recomendación condicional, nivel de evidencia moderado.

**C18. Se sugiere titular con sedantes diferentes a dexmedetomidina cuando se requiera sedación profunda y evitar dosis superiores a  $1.4\text{ mcg/kg/h}$ .** Recomendación condicional, nivel de evidencia bajo.

**C19. Se recomienda en pacientes con bradicardia y repercusión hemodinámica disminuir la dosis de mantenimiento o interrumpirla temporalmente.** Grado de recomendación: fuerte. Recomendación fuerte, nivel de evidencia bajo.

## **Justificación:**

El interés por alcanzar el estado estable en la concentración de un medicamento puede promover el uso de dosis de carga de dexmedetomidina y lograr sus efectos deseados. Sin embargo, su dosis de carga en la mayoría de los pacientes críticos está asociada a la aparición de eventos secundarios cardiovasculares, además que puede ser innecesaria y menos efectiva que otras alternativas de más rápido inicio de acción.

La aparición de eventos adversos hemodinámicos (bradicardia e hipotensión) son más frecuentes cuando se utilizan: dosis de carga, dosis de mantenimiento  $>0.7$  mcg/kg/h y durante sedación profunda, como se ha encontrado en ensayos clínicos, revisiones sistemáticas y meta-análisis. La presentación de bradicardia severa ( $< 40$  lpm o que requiere intervención), es más frecuente con rápidas dosis de carga (en  $<10$  min) y dosis de mantenimiento  $>1.2$  mcg/kg/h. Igualmente, se ha observado mejoría de la bradicardia disminuyendo la dosis o interrumpiendo la infusión temporalmente. (98,99).

Fan y cols. (98) realizaron un meta-análisis de 16 estudios en pacientes críticos postquirúrgicos, donde se encontró una asociación significativa entre las dosis de carga y la aparición de bradicardia, con un OR de 1.86, (IC 95% 1.36 – 2.55), y la presentación de hipotensión arterial con un OR de 1.53, (IC 95% 1.17 – 2.0). Son de resaltar los siguientes ensayos clínicos: el de Martin y cols. (100) donde se usaron cargas de 1.0 mcg/kg en 10 minutos y se mantuvieron niveles de sedación hasta Ramsay 6; el estudio de Herr y cols (101) con niveles de sedación hasta Ramsay 5; y los tres estudios de Park y cols, (102) el de Balkanay y cols. (103) y el de Abd y cols. (104), en donde se administraron las dosis de carga en bolo inmediato. En los dos últimos, además las dosis de carga usadas fueron de 4.0 mcg/kg



y se asoció significativamente con una mayor aparición de hipotensión, con un OR de 3.96 (IC 95% 1.33 – 11.81).

En un ensayo clínico doble-ciego realizado por Mueller y cols. (105) de la Universidad de Colorado en pacientes críticos con abstinencia alcohólica tratados con lorazepam en los que la terapia coadyuvante con dexmedetomidina demostró reducir las dosis de benzodiacepina, se compararon las dosis altas (1.2 mcg/kg/h) versus dosis bajas (0.4 mcg/kg/h) versus placebo. La incidencia de bradicardia fue más alta en los pacientes que recibieron dexmedetomidina (25% vs 0%), siendo muy significativa la disminución de la frecuencia cardíaca en los pacientes con altas dosis (87%,  $p=0.04$ ), mientras que no hubo diferencia entre los de dosis bajas y el placebo (37.5% vs 25%,  $p=0.5$ ). La incidencia de hipotensión fue más alta en el grupo de dosis altas (25% vs 12.5%, vs 0%), pero estas diferencias no fueron significativas ( $p=0.52$ ).

Un meta-análisis realizado por Tan y Ho (106) incluyó 24 estudios donde el uso de dexmedetomidina se asoció con una reducción en la estancia en UCI. En este meta-análisis se encontró un mayor riesgo de bradicardia, que necesitó intervención cuando se administraron dosis de carga junto con dosis de mantenimiento  $> 0.7$  mcg/kg/h, RR = 7.3, (IC95% 1.73-30.81,  $p=0.007$ ). Se resalta el estudio de Triltsch y cols. (107) donde se usaron cargas de 1.0 mcg/kg en 10 minutos y se mantuvieron niveles de sedación mediante BIS entre 60-70, y los dos estudios de Memis y cols, (108,109) y los tres de Elbaradie y cols, Tasdogan y cols, y Venn y cols, (110–112) en donde se usaron dosis de carga entre 1.0 y 2.5 mcg/kg en 10 minutos, dosis de mantenimiento hasta 2.5 mcg/kg/h y niveles de sedación hasta Ramsay 5. De estos, en el estudio de Venn la dexmedetomidina se asoció significativamente con mayor incidencia de hipotensión, 23% vs 0%, con un RR de 4.99 (IC 95% 1.53 – 408.11).

En contraste, en los cinco estudios de Akin y cols, Esmaglu y cols, Riker y cols, Maldonado y cols, y Reade y cols, (113–117) se utilizaron dosis de carga  $< 1.0$  mcg/kg, en un tiempo  $\geq 20$  minutos (o no se usaron dosis de carga), se mantuvieron dosis de mantenimiento menores a  $0.7$  mcg/kg/h y niveles de sedación por RASS alrededor de cero. En estos estudios no hubo diferencia en la incidencia de bradicardia ni hipotensión entre los grupos con dexmedetomidina comparada con el control. Igualmente, en el estudio de Su y cols. (118) publicado en *Lancet* en 2016, se utilizaron dosis muy bajas de dexmedetomidina ( $0.1$  mcg/kg/h) en pacientes mayores de 65 años admitidos a UCI en postoperatorio de cirugía no cardíaca. Esta dosis profiláctica disminuyó significativamente la incidencia de delirium durante los primeros 7 días de cirugía y no hubo diferencia significativa entre el placebo y la dexmedetomidina en la aparición de bradicardia ( $13.1\%$  vs  $16.9\%$ ,  $p=0.17$ ) ni hipotensión ( $26.3\%$  vs  $32.6\%$ ,  $p=0.07$ ). Incluso, en el grupo placebo hubo una significativa mayor incidencia de taquicardia ( $13.7\%$  vs  $6.6\%$ ,  $p=0.002$ ) e hipertensión ( $17.7\%$  vs  $9.7\%$ ,  $p=0.02$ ).

## **DURACIÓN**

**C20. Se sugiere evaluar periódicamente la necesidad de continuar por tiempo prolongado (hasta por 7 días) la infusión de dexmedetomidina.** Recomendación condicional, nivel de evidencia moderado.

**C21. Si se requiere continuar sedación con el uso de dexmedetomidina en mantenimiento  $>7$  días, dado que no hay evidencia suficiente para recomendar cuánto es el tiempo máximo. Se sugiere alternar con periodos de interrupción y vigilar la aparición de efectos adversos.** Recomendación condicional, nivel de evidencia bajo.

**Justificación:**

La dexmedetomidina fue aprobada por la FDA (*Food and Drug Administration*) para su uso comercial por primera vez en los Estados Unidos el 23 de diciembre de 1999, en “pacientes críticos en ventilación mecánica durante menos de 24 horas” y para “sedación en pacientes no intubados antes y/o durante procedimientos quirúrgicos u otros procedimientos” (119). Desde entonces se han hecho actualizaciones ampliando las indicaciones de uso, la última en el 2016, pero manteniendo la restricción en Estados Unidos por < 24h. (120)

En Colombia en el año 2000 recibe la aprobación por el INVIMA (Instituto Nacional de Vigilancia de Medicamento), inicialmente para menos de 24 horas, posteriormente en el año 2008 se autorizó hasta por 48 horas y desde el 29 de enero de 2016 no hay limitación en el tiempo de uso, (121) mientras que en Japón recibió aprobación para su introducción en el 2004 y desde junio de 2010 no hay limitación en el tiempo de utilización. (122)

En la Unión Europea fue aprobado su uso comercial solo desde septiembre de 2011 por la EMA (*European Medicines Agency*), también inicialmente por < 24 h, (123) pero desde la última actualización de enero de 2018 no se menciona ninguna restricción en el tiempo de uso. (124) Una revisión sobre el estado de aprobación de la dexmedetomidina en diferentes países fue hecha por Kunisawa en el 2011. (125)

Algunos ensayos clínicos reportan el uso entre 3 y 19 días, y estudios de cohortes y series de casos usos entre 10 y 30 días. Por el contrario, al limitar su uso por un tiempo prolongado cuando el paciente requiere sedación, puede facilitar el uso de benzodiacepinas, propofol, barbitúricos u opioides a dosis altas con reconocidos resultados adversos.

En el ensayo clínico realizado por Ozaki y cols. (126) se evaluó específicamente la seguridad y eficacia de la dexmedetomidina a largo plazo, en 75 pacientes críticos. No se

encontraron efectos adversos atribuibles a su uso prolongado, ni diferencia en efectos adversos hemodinámicos o respiratorios.

Se destacan siete estudios antes del año 2011, cuatro de estos son ensayos clínicos: Esmaoglu y cols, y Shehabi y cols, (114,127) donde se utilizó hasta por 72 horas; y los estudios de Riker y cols. (SEDCOM) y Pandharipande y cols. (MENDS) (48,115), donde se utilizó hasta por 5 días. En ninguno de estos se encontraron efectos adversos atribuibles al uso prolongado de la dexmedetomidina. Dos estudios retrospectivos, Wunsch y cols. (128) y Camarena y cols. (129) evaluaron la seguridad del uso prolongado de dexmedetomidina; el primero entre los años 2001 y 2007, definiendo como uso prolongado  $> 48$  horas, y el segundo entre los años 2003 y 2004, definiendo como uso prolongado  $> 24$  horas. En estos dos estudios tampoco se encontraron efectos adversos atribuibles a su uso prolongado. Finalmente, Irola y cols. realizaron un estudio de farmacocinética y seguridad de la infusión prolongada en pacientes críticos, sin encontrar efectos adversos por su uso hasta por 14 días (130).

Desde el año 2012 hasta el 2017 hay nueve estudios, seis de estos son ensayos clínicos: Ozaki y cols. ya mencionado (126), donde se usó hasta por 19 días. Rashid y cols. Cheng y cols. y Jakob y cols. (131–133) donde se utilizó hasta por 3 días. En estos estudios la dexmedetomidina se asoció a disminución de la frecuencia cardiaca sin bradicardia, sin hipotensión, menor requerimiento de antihipertensivos, mejor control del dolor, menor consumo de analgésicos, disminución en la estancia en UCI y en el hospital, menores niveles de marcadores inflamatorios y mejoría de la motilidad intestinal. Los estudios de MacLaren y cols. y Reade y cols. (134,135) la usaron hasta por 4 y 7 días, respectivamente. En este último estudio la dexmedetomidina se asoció a disminución en el tiempo en ventilación

mecánica y menor incidencia de delirium. En ninguno de estos seis ensayos clínicos, se encontraron efectos adversos atribuibles a su uso prolongado. Los otros tres estudios son dos de cohortes: VanderWeide y cols. y Fujita y cols. (136,137) donde se usó por 3 y 4 días, respectivamente, y una serie de casos, DeMuro y cols. (138) en donde se usó hasta por 10 días, sin encontrar efectos adversos asociados al uso prolongado.

**C22. Se sugiere suspender transitoriamente la infusión de dexmedetomidina cuando se sospeche hipertermia asociada a su uso, especialmente en obesos y en postoperatorio de cirugía cardiovascular.** Recomendación condicional, nivel de evidencia bajo.

**Justificación:**

Se ha reportado hipertermia de  $>39.5^{\circ}$  en pacientes críticos con infusión de dexmedetomidina. Esta se ha asociado con mayor mortalidad, aunque no con causalidad. Se desconoce el mecanismo, pero los grupos de riesgo son los pacientes obesos y en postoperatorio de cirugía cardíaca. Esta hipertermia revierte al suspender temporalmente la infusión. Krüger y cols. publicaron una serie de nueve casos de pacientes en postoperatorio de cirugía cardiovascular con temperatura  $> 38.5^{\circ}$ , que apareció entre las 4 y 10 horas de iniciar la infusión, con dosis entre 0.8 y 1.3 mcg/kg/h, la cual revirtió entre 1 y 8 horas después de su retiro. En todos los casos, se descartaron causas infecciosas y no infecciosas y se confirmó reacciones adversas a drogas (139).

Por otro lado, Grayson y cols. publicaron una cohorte retrospectiva de 9782 pacientes de cuidado intensivo entre 2009 y 2016, de los cuales 611 (6.3%) recibieron dexmedetomidina a dosis entre 0.1 y 1.5 mcg/kg/h. Se registraron temperaturas  $\geq 39.5^{\circ}\text{C}$  en 341 (3.5%) de todos los pacientes. La mortalidad hospitalaria global fue 10.8%, mientras que

en los que tuvieron hipertermia fue de 29.3%. La exposición a dexmedetomidina fue más frecuente en pacientes con hipertermia comparada con aquellos con temperatura  $<39.5^{\circ}\text{C}$ , 11.94% versus 2.94%, (OR 4.49 IC 95% entre 3.37 y 5.92,  $p<0.001$ ). La hipertermia apareció entre 1 y 48 horas después del inicio de la infusión y no se encontró asociación con la dosis ni con la duración de la infusión. El análisis multivariado mostró una asociación independiente entre dexmedetomidina y temperatura  $\geq 39.5^{\circ}\text{C}$  en dos tipos de pacientes: cirugía cardíaca (OR 2.72, IC 95% 1.1 a 6.9,  $p<0.001$ ), y obesidad (OR 3.44, IC 95% 1.5 a 7.9,  $p<0.001$ ) (140).

#### **D. Indicaciones y estrategias para la sedación profunda.**

**¿Cuál es la estrategia farmacológica recomendada para mantener RASS -4 o -5 en pacientes que requieren sedación por más de 72 horas?**

**D1. Se recomienda la asociación de un hipnótico a un analgésico (preferentemente un opiáceo) para alcanzar una sedación profunda, siempre que ésta esté clínicamente justificada.** Recomendación fuerte, nivel de evidencia moderado.

##### **Justificación:**

La estrategia farmacológica habitual para lograr una sedación profunda es asociar un opiáceo y uno o varios hipnóticos. Dentro de los opiáceos más utilizados se encuentran la morfina y el fentanil por vía endovenosa. El remifentanil se suele asociar más a la sedación ligera o a la analgo-sedación. El hipnótico inicial de elección es el propofol a una dosis no superior a los 4 mg/kg/h hasta un máximo de 7 días, evitando aquellas estrategias

farmacológicas basadas en benzodiacepinas (141). Aunque normalmente el uso de propofol es considerado por un período no mayor a 72 horas continuas, la limitación en la ficha técnica de la Agencia Española del Medicamento y Productos Sanitarios sugiere un máximo de uso de 7 días.

Sin embargo, su asociación al Síndrome de infusión de Propofol, acidosis metabólica potencialmente mortal, dificultad de manejo hemodinámico en aquellos pacientes inestables, el aumento de lípidos y la necesidad en algunos pacientes de una sedación profunda de más de 7 días, hace que en aquellos pacientes que precisan una dosis de propofol elevada para conseguir un RASS objetivo igual o inferior a -4, se siga recurriendo a la infusión de midazolam en algunas Unidades de Cuidados Intensivo. (32)

En algunos casos donde el paciente puede requerir un plano de sedación profunda (RASS -4 o -5), la cual, si es menor a 72 horas, puede alcanzarse con Propofol más opioides o benzodiacepinas. Pero si ésta es mayor a 72 horas, se pueden presentar algunos efectos secundarios como: delirium, déficit cognitivo, disfunción muscular, y efectos adversos relacionados directamente a los medicamentos utilizados (síndrome de infusión de propofol (32) y el síndrome de infusión del midazolam).

Sandiumenge y cols. realizaron un estudio con 63 pacientes de trauma y compararon el uso de midazolam o propofol con rescate de morfina para dolor en sedación profunda por más de 48 horas. Este estudio no especifica el tiempo máximo usado de los medicamentos. Las metas de sedación se alcanzaron de manera similar y el comportamiento del paciente después de la interrupción del fármaco no fue diferente en ninguno de los grupos (midazolam y propofol) (142).

Ugarte y cols. compararon un protocolo de sedación con 155 pacientes no basado en analgesia (Midazolam en mayor dosis que Fentanil) versus un protocolo de sedación con 132 pacientes, basado en analgesia (Fentanil en mayor dosis que Midazolam) por un tiempo máximo de intervención de 7 días. En este estudio no buscaban mantener niveles de sedación profunda y la proporción de pacientes en sedación profunda o en coma disminuyó de 55.2% a 44.0% en el grupo basado en analgesia. La agitación no cambió entre los períodos y se mantuvo aproximadamente en un 7%. Los días sin ventilación hasta el día 28, la duración de la estancia en la unidad de cuidados intensivos y la mortalidad fueron similares en ambos grupos. En un año, los síntomas del trastorno de estrés postraumático en los supervivientes fueron similares en ambos grupos (31).

Ho Kmi y cols. (143) realizaron un meta-análisis del uso prolongado de propofol sin tener en cuenta el nivel de sedación, alcanzado con dosis reportadas de 3 a 12 mg/kg/hora, comparado con lorazepam, midazolam, morfina y morfina más diazepam. El uso de propofol a largo plazo (diferencia media: -2.15 días, IC 95% -3.85 a -0.46) se asoció con una reducción estadísticamente significativa en la duración de la estancia en la UCI comparado con los otros regímenes de sedación. La mortalidad no fue significativamente diferente entre los pacientes sedados con propofol, o un agente sedante alternativo (OR 1.05, IC del 95%: 0.80-1.38,  $p=0.74$ ). El uso de propofol para la sedación a mediano y largo plazo se asoció con una reducción significativa en la duración de la estancia en UCI (-0.99 días, IC del 95%: -1.51 a -0.47,  $p=0.0002$ ) cuando se compara con un agente sedante alternativo; sin embargo, este beneficio se volvió insignificante (en días -0.98; IC del 95%: -2.86 a 0.89,  $p=0.30$ ) cuando la comparación se limitó entre propofol y midazolam.



Se puede sugerir que necesariamente para mantener los pacientes en sedación profunda por más de 72 horas se puede usar una estrategia alternante de sedación basada en analgesia con opioides y no opioides (ketamina, AINES, bloqueos, entre otros), con uso concomitante de agentes hipnóticos a la menor dosis posible y dexmedetomidina, para disminuir los requerimientos de cada uno de estos agentes (144).

**D2. Se sugiere evitar el uso de midazolam en sedación profunda prolongada y/o asociarlo a un opiáceo, propofol y/o dexmedetomidina.** Recomendación condicional, nivel de evidencia moderado.

***Justificación:***

Los agentes más usados para sedación son midazolam y/o de propofol por vía endovenosa. El midazolam está ampliamente utilizado para la sedación profunda. Sin embargo, el hecho de que la infusión de benzodiacepinas se asocia a mayor probabilidad de sobre-sedación, aumento en la incidencia de delirium, prolongación de la ventilación mecánica, de la estancia en UCI y de la estancia hospitalaria, se sugiere evitar el uso rutinario de este agente en la propuesta inicial del manejo de sedación. La alternativa al midazolam es el propofol, el cual puede proporcionar sedación profunda sin acumulación en el organismo, pero con la limitante del desarrollo de Síndrome de Propofol cuando se utiliza a dosis superiores de 5 mg/kg /hora por más de 72 horas (141).

La dexmedetomidina es un alfa-2 agonista utilizado en la sedación ligera, RASS entre 0 y -3 (145). En un estudio Jakob y cols. demostraron que la dexmedetomidina en monoterapia no es capaz de mantener una sedación profunda (RASS -4 o -5). En sedación profunda, la dexmedetomidina, junto a propofol y fentanil, es utilizado por algunos autores

en la ventilación prolongada con sedación profunda para optimizar la viabilidad postquirúrgica (injerto maxilofacial), aunque en este estudio los pacientes no sobrepasaron una media de 55 horas en sedación profunda (146).

**D3. Se sugiere considerar el uso de la sedación inhalada como alternativa a la sedación intravenosa profunda en casos de estatus asmático, estatus epiléptico o dificultad respiratoria.** Recomendación condicional, nivel de evidencia bajo.

***Justificación:***

Dentro de las estrategias para evitar dosis altas de midazolam o propofol está la asociación con un opiáceo, añadir un alfa-2 agonista como la dexmedetomidina o sustituir los hipnóticos por agentes volátiles (sevoflurano, isoflurano o desflurano). La sedación profunda basada en fármacos endovenosos puede generar efectos adversos por acumulación tolerancia, delirium, inestabilidad hemodinámica o privación. Los agentes volátiles poseen un perfil farmacocinético más favorable sin poder acumulativo debido a su rápida eliminación pulmonar (147).

En los últimos años ha irrumpido en las Unidades de Cuidados Intensivos la sedación inhalatoria mediante dispositivos reflectores que permitan su utilización con los ventiladores convencionales de UCI, sin comprometer la seguridad de los profesionales de salud. Mediante esta técnica, se puede administrar agentes volátiles para conseguir una sedación uniforme y un despertar predecible. Se trata de los dispositivos AnaConDa® (Anaesthetic Conserving Device), con el que se puede administrar tanto isoflurano como sevoflurano, y el sistema Mirus®, con el que además es posible administrar desflurano. Diversos estudios demuestran que la sedación inhalatoria en UCI consigue un despertar más rápido y predecible

que el propofol y midazolam, ofrece propiedades cardio-neumo protectoras, con un no demostrado efecto neurodegenerativo a largo plazo. El sevoflurane puede aumentar el nivel de flúor en el paciente crítico y no se recomienda su administración prolongada sin monitorizar la función renal. Sin embargo, no se ha evidenciado que la inhalación de agentes volátiles produzca un empeoramiento de la función renal. El isoflurano es un agente más potente, aunque con un despertar sensiblemente más tardío que sevoflurane, en cambio, desflurane es menos potente pero ofrece un despertar más rápido (148). La sedación inhalatoria está propuesta en las Guías Alemanas de Sedación y Analgesia del 2015 como una alternativa a la sedación endovenosa en pacientes seleccionados (149).

La sedación inhalatoria puede ser útil en la sedación en casos de estatus asmáticos, estatus epilépticos persistente y distrés respiratorio (150). Jabaudon y cols. realizaron un estudio aleatorizado controlado multicéntrico en el que compararon la oxigenación en pacientes con distrés respiratorio ventilados y sedados con sevoflurane o midazolam. En el día 2, la  $pO_2/FiO_2$  fue mayor en el grupo sedado con sevoflurano respecto a los sedados con midazolam ( $205 \pm 56$  vs.  $166 \pm 59$ , respectivamente;  $p=0.04$ ). Además, observaron una reducción de marcadores inflamatorios epiteliales en aquellos pacientes sedados con sevoflurane (151).

Redaelli y cols. recurrieron a isoflurane en 9 de 15 pacientes con SDRA por necesidad de altas dosis de sedantes o hipertrigliceridemia asociada a propofol, durante una media de  $5.6 \pm 1.8$  días, consiguiendo una reducción significativa de la dosis de los otros sedantes (152). Verkoyen y cols. analizaron retrospectivamente los resultados de la sedación de 66 pacientes con SDRA en ECMO y sedación prolongada con propofol vs. isoflurano, y aunque no se observaron diferencias en los resultados clínicos, si describen un mejor control y

menores efectos secundarios con isoflurane (153). En un estudio retrospectivo de 200 pacientes post-quirúrgicos bajo ventilación mecánica durante más de 96 horas, Bellhardt y cols. observaron una reducción de la mortalidad hospitalaria (OR 0.35 (95% CI 0.18 to 0.68;  $p=0.002$ ) y mortalidad al año (OR 0.41 (95% CI 0.21 to 0.81;  $p=0.010$ ) en aquellos pacientes que fueron sedados con sevoflurano respecto a aquellos sedados con propofol o midazolam (154).

Por tanto, la evidencia del uso de agentes anestésicos volátiles en UCI es creciente con resultados prometedores en tiempos de extubación más rápidos y estabilidad cardiovascular. El uso de agentes volátiles dentro de la unidad de cuidados intensivos es una técnica novedosa que todavía requiere capacitación del personal y aceptación cultural. El protocolo VALTS (*Volatile Agents for Long Term Critical Care Sedation*) es un ensayo controlado aleatorizado en desarrollo, que pretende evaluar la seguridad y la viabilidad de administrar agentes volátiles para la sedación de pacientes adultos de UCI, que requieren ventilación mecánica y sedación por más de 48 h, comparando isoflurano inhalado (40 pacientes) o midazolam y / o propofol por vía intravenosa (20 pacientes) para sedación. Este estudio ayudará a aclarar el impacto de los agentes inhalados en pacientes críticos (155).

## **E. Impacto de la amnesia versus la conservación de la memoria.**

**¿Cuál es el impacto que tiene actualmente la amnesia versus la conservación de la memoria en los pacientes adultos críticos?**

**E1. Se recomienda promover el recuerdo de eventos positivos y evitar amnesia completa para disminuir el Síndrome Post-Cuidados Intensivos (PICS) y mejorar el**

**desenlace funcional del paciente posterior al alta de UCI.** Recomendación fuerte, nivel de evidencia bajo.

***Justificación:***

Los pacientes admitidos a una unidad de cuidados intensivos (UCI) experimentan una mezcla de recuerdos positivos y negativos durante la recuperación, asociados o no a sensación de angustia. Se reportan frecuentemente recuerdos declarativos (de hechos reales o memoria episódica, incidencia 18%-96%), recuerdos productos de las emociones (memoria emocional, incidencia 9%-88%) y recuerdos comunes relacionados con eventos de la UCI (aproximadamente en el 18%-38% de los pacientes) (156).

Son múltiples los factores no modificables y modificables que afectan la aparición de los diferentes tipos de memoria en el paciente crítico (estado de enfermedad, co-morbilidad, edad, estrategias de sedación, agentes farmacológicos, ventilación mecánica, delirium, sepsis, entre otros); sin embargo, no conocemos la influencia individual de cada uno de ellos y su influencia concomitante con los otros (157). Esto se traduce en una limitación terapéutica para evitar la presencia de memorias no placenteras o negativas (delusionales o emocionales) que pudieran afectar el desenlace neurocognitivo del paciente crítico después del alta de UCI.

Los recuerdos de la estancia en UCI juegan un papel importante en el desarrollo del síndrome de post-cuidado intensivo (SPCI), un síndrome que se caracteriza por "*deterioro nuevo o empeoramiento en el estado físico, cognitivo o mental, que surge después de una enfermedad crítica y que persiste más allá de la hospitalización en cuidados intensivos*" (158). Los recuerdos delirantes y emocionales se han asociado con el desarrollo de síntomas de ansiedad, depresión y SPCI después del egreso de la UCI (159). El papel de los recuerdos

de hechos reales no está claro, los positivos pueden ser protectores para los pacientes frente a la ansiedad y los síntomas de estrés postraumático. (160) Sin embargo, la cantidad de recuerdos angustiantes son un factor significativo para su desarrollo (157).

Por otro lado, un funcionamiento cognitivo adecuado después del alta de la UCI se asoció significativamente con no tener recuerdos negativos de la experiencia en cuidados intensivos (161). Por lo tanto, los recuerdos agradables pueden disminuir el impacto de la angustia del paciente, presumiblemente evitando que el estrés se vuelva traumático, y reduciendo el riesgo concomitante de problemas psicológicos posteriores, como el trastorno de estrés postraumático. Los pacientes sin recuerdos de la UCI presentaron mayores tasas de secuelas cognitivas al egreso y al año de seguimiento en comparación con el grupo de pacientes que tuvo recuerdos de la UCI. Los pacientes sin recuerdos de la UCI tenían una mayor magnitud de deterioro cognitivo al tiempo de alta hospitalaria, pero no a 1 o 2 años de seguimiento (161).

**E2. Se recomienda la sedación ligera en el paciente crítico para disminuir el desarrollo de recuerdos asociados a trastorno de la senso-percepción (ilusiones o alucinaciones).**

Recomendación fuerte, nivel de evidencia moderado.

***Justificación:***

La memoria impactará dependiendo del tipo de recuerdo que se tenga (emocional, hecho real o delirante). Si el recuerdo es desagradable lo más probable es que afecte negativamente a la evolución cognitiva del paciente. Aunque no existe un único factor a modificar, el factor que más afecta es la estrategia de sedación y analgesia, sin olvidar la influencia que pudiera tener la presencia de delirium en todo este proceso (162). Por otro

lado, el no recordar producido por la sedación profunda persistente también puede generar un impacto negativo y entorpecer la evolución cognitiva del paciente. Por ende, las estrategias de sedación superficial actuales pueden favorecer una mejor calidad del recordar y recordarlo de una manera no desagradable (161). De esta manera, las experiencias positivas pueden equilibrar el impacto de las negativas y reducir el efecto de las impresiones negativas que pueden seguir a las experiencias angustiosas.

Se sugiere que el tiempo de recuperación de los pacientes de la UCI y el posterior bienestar psicológico pueden verse influenciados por recuerdos desagradables o angustiosos de la estancia en cuidados intensivos. Rattray y cols. en un estudio de 103 pacientes de seis UCIs, sobre ansiedad, depresión y síntomas relacionados con el estrés postraumático al egreso del hospital, encontraron una asociación significativa entre las percepciones de los pacientes sobre su experiencia en cuidados intensivos y su resultado emocional al alta hospitalaria (163). Ringdal y cols. incluyeron 153 pacientes traumatizados en un estudio multicéntrico y concluyeron que los pacientes con recuerdos delirantes tenían peor calidad de vida, desarrollaban más ansiedad y depresión en comparación con aquellos sin estos recuerdos (164).

Burry y cols. en un estudio prospectivo comparando protocolo de sedación versus protocolo de sedación más interrupción diaria, en donde usaron la herramienta de Memoria de la UCI para describir los recuerdos de hechos reales, emocionales y delirantes, encontraron que 3 días después del alta de UCI, el 28% de los pacientes informaron que no recordaban haber estado en la UCI. Paradójicamente, la mayoría de los pacientes tuvieron recuerdos específicos de su estancia, el 97% informó al menos una memoria de hecho real, el 90% al menos una memoria emocional, como ansiedad, confusión o incomodidad-dolor, y el 72%

informó al menos una memoria delirante, como alucinaciones o pesadillas. No se encontró relación entre los recuerdos delirantes y el delirium, la exposición al fármaco sedante o el nivel de sedación (82). Adicionalmente, encontraron que los pacientes incluidos en el grupo de interrupción diaria generalmente tenían recuerdos delirantes hasta 90 días después del alta. A pesar del uso de estrategias de sedación que priorizaron el manejo del dolor y la sedación ligera, un porcentaje notable de pacientes informó sobre el recuerdo del dolor y de miedo (82).

Aunque, actualmente, hay evidencia limitada e inconsistente, la influencia de la sedación en los recuerdos tiene un soporte moderado, la sedación profunda durante el tratamiento en la UCI a menudo se asoció con amnesia y recuerdos delirantes, mientras que la sedación superficial se asoció con un mayor riesgo de percibir las experiencias estresantes como más molestas (162). Esto sugiere que las estrategias para minimizar la sedación profunda y optimizar la sedación superficial deben continuar desarrollándose e implementándose. Diferentes estrategias de sedación como el uso de protocolos de sedación, interrupción diaria de la sedación y diversos agentes sedantes como midazolam, isoflurano, morfina y propofol han sido estudiadas para dilucidar su asociación con los recuerdos de la UCI, sin encontrarse una estrategia particular mejor o peor que otras. Sin embargo, estos estudios tenían tamaños de muestra relativamente pequeños con restricción para determinar diferencias significativas (165,166). Por lo tanto, se requiere de investigaciones adicionales que impliquen muestras de mayor tamaño y un control efectivo de las intervenciones relacionadas.



**E3. Se sugiere realizar un diario de la estancia en UCI del paciente crítico dentro de un plan integral a la rehabilitación neurocognitiva post UCI.** Recomendación condicional, nivel de evidencia bajo.

***Justificación:***

Debemos partir del hecho que el concepto de memoria es bastante complejo, y el impacto del recuerdo estará atado al tipo de memoria. En general, el paciente crítico a su egreso tiene una mezcla de los tipos de memorias (recuerdos) en mayor o menor grado, por lo cual, recordar es importante, pero que en lo posible que no sean recuerdos traumáticos. Pacientes críticos que han sobrevivido al alta de UCI refieren recuerdos perturbadores o períodos de amnesia que persisten durante meses después del alta (167).

Promover amnesia durante la estancia en UCI mediante sedación innecesaria quizás no sea la mejor estrategia, debido a que el paciente no podrá recordar toda su estancia y su memoria se convierte en un conjunto de fragmentos que reconstruyen su estadía en UCI. Lamentablemente, es inevitable que conserve memorias no placenteras o negativas, y nuestros esfuerzos deben ser dirigidos a que esos fragmentos deben estar compuestos por memorias no placenteras y por memorias placenteras o positivas, independiente del tipo de memoria. Si se logra balancear, o por lo menos enriquecer al paciente con algunas o varias memorias placenteras, muy probablemente impactaremos de manera positiva el desenlace cognitivo a corto y largo plazo.

Para rellenar estos períodos de amnesia se ha sugerido la realización de diarios durante la estancia en UCI, los cuales se describieron por primera vez en Dinamarca en los años ochenta. La familia y el personal de enfermería, mediante breves notas sobre los

acontecimientos diarios, pudieron facilitar al paciente conocer aspectos de su estancia en UCI, recuperando los recuerdos perdidos por la enfermedad y la amnesia inducida por la sedación, promoviendo la comprensión de la gravedad de su enfermedad (168).

Los diarios personales se han extendido a otros países, como Reino Unido, Noruega y Suecia. Su uso actualmente es irregular y su impacto, positivo o negativo, en la recuperación psicológica de los sobrevivientes después del alta, requieren más investigación (169). La evidencia sobre el uso de diarios en el paciente sugiere que el uso de los mismos actúa como una herramienta terapéutica, llena períodos de amnesia generalmente de forma positiva, y pueden ayudar a algunos pacientes a realizar una recuperación psicológica significativa. Una revisión de Teece y Baker, tras el análisis de tres temas (reclamar la propiedad del tiempo perdido, enfatizar la personalidad y miedo/frustración) demostró que la intervención diaria tuvo un impacto en gran medida positivo en la rehabilitación psicológica de los sobrevivientes. Sin embargo, algunos destinatarios pueden encontrar el contenido doloroso y emocional, por lo que los diarios deben ser usados con precaución y dentro de un plan integral de los cuidados del paciente crítico y post-crítico, no como una herramienta individual (170).

En una revisión de Cochrane, donde evaluaron tres estudios clínicos que utilizan estos diarios en busca de consolidar estos fragmentos de memoria, no brindan un respaldo sólido para usar rutinariamente estas herramientas, como un instrumento que impacte positivamente en el desenlace neurológico del paciente. Solo un estudio parece que redujo el síndrome de estrés postraumático en los familiares (171).

## **F. Sedación en paciente con SDRA y ECMO.**

## **¿Cuál es el manejo de sedación recomendado en pacientes adultos con síndrome de dificultad respiratoria aguda (SDRA)?**

**F1. En pacientes que presentan SDRA con  $\text{PaO}_2/\text{FiO}_2$  mayor o igual a 150 se recomienda seguir los lineamientos dados por la guía, sedación consciente o cooperativa siempre que sea posible, usando las recomendaciones para pacientes en ventilación mecánica, evaluando los niveles de sedación periódicamente con escalas y usar los protocolos de sedación guiados por enfermería. En pacientes que presentan trastornos de oxigenación moderado  $\text{PaO}_2/\text{FiO}_2 < 150$  y que requieren relajación muscular se sugiere sedación profunda. Recomendación fuerte, nivel de evidencia moderado.**

### **Justificación:**

El SDRA es un cuadro clínico que se caracteriza por presentar hipoxemia en cuyo manejo es usualmente necesario el uso de la ventilación mecánica, siendo esta la indicación del uso de sedación (172). El objetivo de la sedación es proporcionar una adaptación durante la ventilación mecánica controlada, mantener parámetros de ventilación protectora como volumen corriente bajo (6ml/kg) y tener presiones mesetas menores a 30 cmH<sub>2</sub>O. Permite mejor adaptación del paciente, reducir las asincronías ventilatorias y el consumo de oxígeno al disminuir la actividad espontánea muscular durante la hipoxemia. En el SDRA severo la sedación profunda mantiene el paciente con ventilación de alta frecuencia y en posición prona, siendo esta inevitable. Durante la fase inflamatoria del SDRA moderado a severo se sugiere sedación profunda y de ser necesario el uso de relajantes musculares. Esta práctica debe evitarse en el SDRA leve. A pesar de que existe evidencia sobre los beneficios la interrupción diaria de la sedación, sedación cooperativa y sedación basada en analgesia, no hay estudios en SDRA, se sugieren estas estrategias en el SDRA leve. (173)

El sevoflurane ha sido estudiado en un ensayo clínico piloto en un solo centro en donde se comparó con midazolam mejorando la  $\text{PaO}_2/\text{FiO}_2$  (promedio  $\pm$  SD,  $205 \pm 56$  vs.  $166 \pm 59$ , respectivamente;  $p = 0.04$ ) y los marcadores de lesión epitelial y algunos inflamatorios (151). La sedación de los pacientes que presentan SDRA y requieren soporte con oxigenación por membrana extracorpórea (ECMO) se describirá en la pregunta correspondiente.

### **¿Cuáles son las mejores estrategias de sedación en pacientes con soporte extracorpóreo (ECMO)?**

**F2 Se sugiere ajustar las dosis de los sedativos (propofol, midazolam o dexmedetomidina) debido a que su farmacocinética se ve alterada por los componentes del circuito. A la vez se sugiere usar ketamina para reducir las dosis de sedoanalgesia y vasopresores.** Recomendación condicional, nivel de evidencia bajo.

#### **Justificación:**

Algunos estudios sugieren que la farmacocinética de los sedantes en ECMO se ve alterada por los componentes del circuito. Se realizó una encuesta internacional de sedación encontrando que el cincuenta y ocho por ciento de los pacientes en ECMO tienen un requerimiento mayor de sedación comparado con otros pacientes críticamente enfermos, mientras que el 51% logró un nivel de sedación cooperativa. Se usó midazolam (79%), morfina (43%) y fentanil (45%). Los agonistas alfa-2 se prescribieron en 66% mientras que el propofol se usó con poca frecuencia (36%). (174)

Shekar K y cols. en un estudio retrospectivo encontró que la dosis de midazolam usada en ECMO aumentó en un promedio de 18 mg por día (intervalo de confianza del 95% 8.29 mg,  $p=0.001$ ), mientras que la dosis de morfina aumentó en 29 mg por día (95% de

confianza intervalo 4.53 mg,  $p=0.021$ ). El grupo veno-venoso recibió una dosis diaria de midazolam de 157 mg más alto que el grupo veno-arterial (intervalo de confianza del 95% 53.261 mg,  $p=0.005$ ). No se observó ningún aumento significativo en las dosis de fentanil a lo largo del tiempo (intervalo de confianza del 95% 1269, 4337  $\mu\text{g}$ ,  $p=0.94$ ). (175)

Se realizó una encuesta en 394 centros registrados, en pacientes que presentan falla ventilatoria aguda y necesidad de soporte con ECMO, en donde al 97% de los encuestados se administraron sedantes y analgésicos. El objetivo de la sedación fue "sedado" o "muy sedado" en el 59%, "tranquilo y cooperativo" en el 25% y "agitado" en 16%. Se utilizó la interrupción diaria de la sedación (51%) y un protocolo de sedación y analgesia (39%). Emplearon midazolam (48%) y propofol (19%). La mayoría de los encuestados informaron que usaron sedación de moderada a profunda. (176)

El uso de ketamina en pacientes con ECMO fue evaluado en un estudio de cohorte retrospectivo en donde se encontró que redujo la infusión de sedo-analgesia, sin alterar la escala de RASS. El efecto de la ketamina puede reducir las dosis de vasopresores. (177)

La sedación con agentes inhalatorios ha sido descrita en una serie pequeña de casos en pacientes con SDRA y soporte con ECMO. Se utilizó isoflurano mediante el sistema AnaConDa, logrando respiraciones espontáneas y mejoría en la función pulmonar. (178)

De Backer y cols. realizó un estudio retrospectivo en el cual buscaba caracterizar el tratamiento de sedación en pacientes con SDRA grave, tratados con ECMO. Después del inicio del ECMO, el 96% de los pacientes fueron sedados profundamente ( $\text{SAS} < 3$ ) con infusiones continuas de midazolam (49%), propofol (18%), o ambos (29%) y 98% recibían

infusiones de opioides (93% con fentanil). Después de la canulación, los pacientes fueron sedados profundamente durante un promedio de 6 días (IQR, 3-10) y posteriormente se realizó transición a sedación intermedia o ligera ( $SAS \geq 3$ ). Antes de la interrupción de ECMO, el 77% de los pacientes supervivientes tenían sedación intermedia y liviana, el 20% no recibía sedantes y el 9% no recibía sedantes opioides. (179) El requerimiento de agentes sedantes midazolam o equivalentes en ECMO en pacientes con SDRA severo, fue casi dos veces mayor que en los pacientes que no requieren ECMO, a las 6 horas se tenía una dosis de 118 mg con ECMO + SDRA (Rango intercuantil 48-225) vs 60 mg solo con SDRA (37-99,  $p=0.004$ ). (180)

## **G. Sedación en paciente con compromiso cardiovascular.**

**¿Cuál es el manejo de la sedación recomendado en pacientes adultos con inestabilidad hemodinámica?**

**G1. Se sugiere la ketamina como coadyuvante a la estrategia de sedación en el paciente hemodinámicamente inestable.** Recomendación condicional, nivel de evidencia bajo.

### **Justificación:**

A diferencia de otros sedantes y analgésicos, la ketamina es broncodilatador y tiene efectos hemodinámicos positivos (aumento en la presión arterial media, frecuencia cardiaca, presión de oclusión de la arteria pulmonar y resistencias vasculares sistémicas), haciéndolo una alternativa atractiva en pacientes críticamente enfermos. Tiene su efecto a través de la inhibición del receptor de N-acetil-D-aspartato y activación de las vías del dolor inhibitorias descendentes (181).

En una revisión sistemática, realizada por Pantawala y cols. (181) se observó que la ketamina produce impacto en la disminución de las infusiones de dopamina y norepinefrina. Adicionalmente, disminuyó los requerimientos de opiáceo. Se debe iniciar una infusión continua a una dosis de 1 to 2 mg/kg/min (0.06-0.12 mg/kg/h) y se puede titular según necesidad hasta 10 a 20 mg/kg/min. Se debe tener cuidado con su uso en pacientes con falla cardiaca y enfermedad coronaria debido a sus efectos hemodinámicos que llevan a un aumento del consumo miocárdico de oxígeno en un 50%. (182).

**G2. Se recomienda usar con precaución agentes sedantes en pacientes con inestabilidad hemodinámica.** Recomendación fuerte, nivel de evidencia moderado.

#### **Justificación:**

En el meta-análisis de Wang y cols. la clonidina no se asoció con una disminución de la duración de la ventilación mecánica, a pesar de un descenso en el uso de narcóticos. Además se observó con un aumento en la incidencia de hipotensión clínicamente significativa (RR 3.11, IC95% 1.64 - 5.87) (183). La dexmedetomidina, ha ganado terreno en la analgo-sedación de los pacientes críticamente enfermos. Según un meta análisis realizado por Constantin y cols. (86), cuando se comparó la dexmedetomidina con lorazepam, midazolam y propofol, esta presentó una incidencia mayor de bradicardia e hipotensión, aunque se ha observado disminución en 48 horas de la estancia en cuidado intensivo, duración de la ventilación mecánica, incidencia de delirium y mejoría en la microcirculación (184). Los principales factores de riesgo asociados a hipotensión y bradicardia son la edad avanzada, la tensión arterial en el límite inferior (presión arterial sistólica menor de 100 mmHg o presión arterial media menor de 70 mmHg) y el uso de bolo o dosis de carga. Además, la frecuencia en la asociación entre el uso de la dexmedetomidina e hipotensión

arterial se ha determinado entre un 4% como definitivos y 76% como probable (185). Por lo cual, ante esta variabilidad de datos, no se podría recomendar el uso sistemático de este medicamento en pacientes hemodinámicamente inestables.

En contraste, en el meta análisis de Lin y cols. el uso de la dexmedetomidina se asoció con aumento en el riesgo de bradicardia pero sin diferencia en el riesgo de hipotensión cuando se compara con otros sedantes, incluso se asoció con disminución en el riesgo de taquicardia ventricular e hiperglucemia (186).

**¿En pacientes con enfermedad coronaria,Cuál es el manejo de la sedación más adecuado?**

**G3. En pacientes con síndrome coronario agudo, se sugiere el uso de dexmedetomidina para sedación.** Recomendación condicional, nivel de evidencia bajo.

**Justificación:**

Aunque no existen estudios clínicos controlados en los cuales se evalué la mejor estrategia de sedo analgesia en pacientes con síndrome coronario agudo, la dexmedetomidina es un fármaco que produce disminución en la tensión arterial y frecuencia cardiaca, por lo tanto reduce la tasa metabólica del corazón y el consumo miocárdico de oxígeno, lo cual tiene un efecto protector. Soliman y cols. (187), (187), en pacientes de alto riesgo de cirugía vascular aórtica, encontraron disminución de la incidencia de isquemia miocárdica en el grupo de pacientes que fueron sedados durante la intervención quirúrgica. Como dato interesante, estos pacientes presentaron mejor estabilidad hemodinámica requiriendo menos nitroglicerina y norepinefrina en la intervención quirúrgica. Ji y cols. (188), también



observaron con el uso de la dexmedetomidina reducción en las complicaciones y mortalidad de los pacientes sometidos a cirugía cardíaca con bypass.

**G4. En pacientes en postoperatorio de revascularización miocárdica, se sugiere el uso de dexmedetomidina como fármaco de elección para la sedación.** Recomendación fuerte, nivel de evidencia alto.

**Justificación:**

En un estudio retrospectivo monocéntrico, realizado por Geriach (189) la incidencia de hipotensión arterial con dexmedetomidina fue hasta en un 42.8%. Cuando se realizó un análisis multivariado, la incidencia hipotensión se asoció a la historia de enfermedad coronaria, a la gravedad de la enfermedad (APACHE II) y a la presión arterial baja de base. Un meta-análisis de once ensayos clínicos realizado por Lin y cols. (186) encontró una asociación entre el uso de dexmedetomidina y disminución en los días de ventilación mecánica (MD -1.39 IC95% -2.04 a -0.74) y menor riesgo de complicaciones post operatorias, incluyendo delirium (RR 0.36 IC95% 0.21,0.64 -1.10) cuando se comparó con otros sedantes. Similares resultados favorables en el postoperatorio de cirugía cardíaca fueron encontrados en otros estudios de Ji y cols. reduciendo significativamente la tasa de mortalidad hospitalaria, a 30 días y un año (190).

**G5. Se sugiere tener precaución con el uso de la dexmedetomidina y los alfa-2 agonistas, ya que tienen riesgo de producir hipotensión arterial y bradicardia.** Recomendación condicional, nivel de evidencia moderado.

**Justificación:**

Duncan y cols. (191), en un meta-análisis del Grupo Colaborativo Cochrane, en el cual se analizaron 17039 pacientes, sobre el uso de alfa agonistas para la prevención de complicaciones en procedimientos quirúrgicos, documentaron el riesgo de producir hipotensión arterial y bradicardia en el subgrupo de la dexmedetomidina. Sin embargo, fueron más importantes estas complicaciones con otros alfa-2 agonistas como la clonidina y Mivazerol.

**¿Cuáles son las estrategias recomendadas para la analgesia y sedación durante la cardioversión eléctrica?**

**G6. Se recomienda el propofol y el midazolam como medicamentos de elección para la realización de cardioversión eléctrica.** Recomendación fuerte, nivel de evidencia moderado.

**G7. La dosis de propofol sugerida va desde 0.5 mg/kg hasta 1 mg/kg para pasar en 30 a 60 segundos, la adición de un opiáceo (Alfentanil 5 mcg/kg, Fentanil 0.5 mcg/kg, Remifentanil 0.25 mcg/kg) a dosis baja es una alternativa segura y no se asocia a mayores complicaciones.** Recomendación condicional, nivel de evidencia moderado.

**G8. El Etomidato parece ser similar al propofol durante la cardioversión eléctrica, sin embargo, se asocia a mayor tasa de eventos adversos por lo cual se considera de segunda línea. El midazolam es efectivo durante la cardioversión eléctrica, sin embargo, requiere vigilancia durante mayor tiempo pos cardioversión y debe estar disponible el flumazenil como antídoto.** Recomendación condicional, nivel de evidencia bajo.

**G9. El agente farmacológico elegido puede ser administrado por un médico con adecuado equipo y entrenamiento en el manejo de la vía aérea. En este escenario el midazolam es el medicamento de elección.** Recomendación condicional, nivel de evidencia moderado.

**G10. Se sugiere la administración de dexmedetomidina a dosis de 1 mcg/kg 10 minutos antes de la administración de un agente sedante para disminuir la recidiva de arritmias en las primeras 24 horas.** Recomendación condicional, nivel de evidencia bajo.

#### **Justificación:**

El fármaco ideal para la realización de una cardioversión eléctrica debe producir sedación profunda, rápida recuperación, estabilidad cardiovascular, sin depresión respiratoria y algún grado de analgesia, este medicamento no existe. Numerosos agentes anestésicos y sedantes se pueden usar para este propósito y no siempre son administrados por un anestesiólogo. El propofol es el medicamento más estudiado en este escenario, dado su rápido inicio de acción, excelente efecto anestésico y corta vida media (192). Una revisión sistemática de 2015 mostró que la mayoría de estudios aleatorizados incluye entre sus protocolos el uso de esta medicación (192). La dosis de propofol recomendada va desde 0.5 hasta 1 mg/kg, con dosis repetidas de 0.5 mg/kg para lograr metas de sedación profunda (193,194). La adición de un opiáceo a dosis baja (Alfentanil 5 mcg/kg, Fentanil 0.5 mcg/kg, Remifentanil 0.25 mcg/kg) se asociaba con adecuada sedo analgesia durante la cardioversión eléctrica, con cambios hemodinámicos similares, mayor proporción de depresión respiratoria con remifentanil y mayor tiempo de recuperación con fentanil (195). El Etomidato no ha demostrado ser superior al propofol y si se asocia a una mayor tasa de mioclonías, sin embargo puede ser una alternativa al propofol en pacientes con hipotensión dado su

estabilidad hemodinámica (194,196). La administración de dexmedetomidina a 1 mcg/kg 10 minutos antes de la administración de propofol disminuye el recuerdo de la cardioversión eléctrica y se asocia a menores tasas de recidiva de la arritmia en las siguientes 24 horas (193). El midazolam es un medicamento efectivo para la sedación durante la cardioversión eléctrica, la dosis es muy variable y debe ser titulada, su uso se asocia con altas tasa de satisfacción por parte del paciente. Puede requerir la administración de flumazenil para revertir la depresión respiratoria, se ha demostrado además que es seguro y puede ser administrado por médicos no anestesiólogos sin aumento de las complicaciones (197,198).

## **H. Sedación en paciente neuro- crítico.**

**¿Cuál es el manejo de sedación recomendado en pacientes adultos con hipertensión endocraneana?**

**¿Cuál es el manejo de sedación recomendado en pacientes adultos con hipertensión endocraneana?**

**H1. Se recomienda aplicar una estrategia de sedación a todos los pacientes con hipertensión endocraneana enfocada en metas de protección cerebral.**

Recomendación fuerte, nivel de evidencia moderado.

### **Justificación:**

La hipertensión endocraneana es una condición grave y potencialmente letal, que debe ser manejada de forma óptima desde los primeros minutos. La sedación adecuada hace parte de las recomendaciones generales de nivel cero, es decir, que deben ser aplicadas a todos los pacientes en quienes se evidencien signos clínicos compatibles, se documente mediante

neuromonitoreo o se sospeche esta entidad (199) 201. La estrategia de sedación a elegir debe estar encaminada a ofrecer protección cerebral en términos de efectos fisiológicos favorables en: control de la presión intracraneal, tasa metabólica cerebral, umbral convulsivo y mantenimiento de la autorregulación vascular cerebral y la presión de perfusión cerebral con mínimos efectos sistémico (200–205). Aunque no se cuenta con estudios clínicos recientes para este tema, la sedación adecuada hace parte del estándar de manejo de los pacientes con hipertensión endocraneana con amplia plausibilidad biológica, siempre que se mantenga un volumen intravascular efectivo acertado para prevenir los cambios hemodinámicos sistémicos propios de los fármacos sedantes con el respectivo cambio en la presión intracraneal.

La elección del fármaco inicial tiene impacto en el pronóstico del paciente neurocrítico. Cornelius y cols (206) realizaron un estudio retrospectivo de los pacientes con sospecha de hipertensión intracraneal que fueron intubados y sedados previo al ingreso a la UCI, evidenciando que los pacientes que recibieron ketamina presentaron una tasa de mortalidad menor que aquellos que recibieron otro tipo de sedantes. El paradigma del uso de la ketamina en pacientes neurocríticos y en especial en aquellos con sospecha de hipertensión endocraneana viene cambiando, pues se ha evidenciado en varios estudios que la ketamina no aumenta la presión intracraneal ni el flujo sanguíneo cerebral siempre que los niveles de Presión de dióxido de carbono ( $\text{PaCO}_2$ ), se mantengan controlados; se presentan menos fluctuaciones en los valores de presión intracraneal, y las constantes hemodinámicas sistémicas se mantienen estables por lo que se considera que la ketamina puede ser incluida en la estrategia de sedación de los pacientes neurocríticos con un aceptable margen de seguridad (207–213)

El propofol es otra estrategia que puede ser aplicada a los pacientes con hipertensión endocraneana, pues disminuye el consumo metabólico cerebral de oxígeno, aunque también el flujo sanguíneo cerebral (214). Tiene una vida media corta, lo cual lo hace un medicamento con propiedades deseables para aquellos casos en los que se pueda evaluar neurológicamente de forma rápida (215). Sin embargo, tiene efectos secundarios que se deben conocer y evitar en los pacientes neurocríticos: disminuye la presión intracraneal, pero este efecto es más notable en pacientes hipovolémicos, generando hipotensión sistémicas y con ello disminución de la presión de perfusión cerebral (216); disminuye los niveles de catecolaminas y puede inducir vasodilatación por esta vía (217), y se debe evitar administrar infusiones mayores a 4 miligramos/kilo/hora durante más de 48 horas para prevenir la aparición del síndrome de infusión de propofol (218). En los casos en los que no esté disponible o se contra indique el uso de propofol, se podría tomar como alternativa benzodiacepinas de acción corta como el midazolam (219), el cual tiene efectos en la hemodinamia cerebral similares a los del propofol (220), y como opción previo a procedimientos rutinarios que pueden generar picos de hipertensión endocraneana como la succión traqueal (221).

La dexmedetomidina es un agonista del adrenoreceptor  $\alpha_2$ , generando disminución de la actividad simpática caracterizada por bradicardia, ansiólisis, sedación, además de un efecto analgésico a nivel espinal que resulta actuando como ahorrador de opioides (222). Los trabajos realizados con dexmedetomidina en pacientes neurocríticos presentan resultados diversos y con alto riesgo de sesgos, sin embargo, se ha evidenciado que su uso en conjunto con otros sedantes como midazolam o propofol, resulta en disminución de los requerimientos

de las dosis totales de los medicamentos para este fin, lo cual favorece a una menos exposición de a efectos adversos con las dosis elevadas de las infusiones de sedantes, esto sin efectos negativos severos en la hemodinamia sistémica ni cerebral, aunque los datos aún son heterogéneos (217,223–227). Toda estrategia de sedación en pacientes con hipertensión endocraneana debe ir acompañada de una estrategia de analgesia, y estas a su vez, idealmente deberían estar orientadas por protocolos institucionales (228).

**H2. Se sugiere reservar el uso de barbitúricos como el tiopental sódico o el pentobarbital solo a los casos de hipertensión endocraneana refractaria a otras medidas terapéuticas.** Recomendación condicional, nivel de evidencia bajo.

**Justificación:**

Los barbitúricos disminuyen el flujo sanguíneo cerebral y el metabolismo cerebral en una cuantía directamente proporcional a la dosis administrada, hasta lograr una abolición de la actividad cerebral. La disminución de la PIC es secundaria a su efecto sobre el flujo sanguíneo cerebral, la cual, se produce por una reducción del metabolismo cerebral, siempre y cuando la hemodinámica cerebral y el acoplamiento del flujo sanguíneo cerebral/consumo de oxígeno se mantenga. En los trabajos más recientes, se ha evidenciado que el efecto neto en mortalidad aún es debatible, y aunque en una proporción importante de los casos se logra el control de la hipertensión endocraneana, este efecto es mayor con tiopental que con pentotal, pero globalmente el 25% de los paciente pueden presentar episodios de hipotensión clínicamente relevante, lo cual ensombrece los efectos en el control de la presión intracraneal (229–232). En los casos de hipertensión endocraneana que no responden a otras medidas terapéuticas incluyendo osmotherapia, se podría incluir un barbitúrico dentro de la estrategia

de sedación con predilección por tiopental sobre pentotal sódico previa verificación del estado de euvoemia y con seguimiento hemodinámico estricto.

**H3. No se recomienda la interrupción diaria de la sedación en los pacientes con hipertensión endocraneana.** Recomendación condicional, nivel de evidencia bajo.

**Justificación:**

A diferencia de la población general que ingresa a las Unidades de Cuidados Intensivos en quienes la interrupción diaria de la sedación se ha asociado a mejores desenlaces en términos de menor tiempo en ventilación mecánica, estancia en UCI y en hospitalización, en los pacientes neurocríticos estas potenciales ventajas no se han establecido y podrían asociarse a un aumento en los riesgos para el paciente. Anifantaki y cols (233), realizaron un ensayo controlado aleatorizado con 97 pacientes en ventilación mecánica, con un análisis del subgrupo de los pacientes que ingresaron con lesión cerebral (38 pacientes), sin evidenciar diferencias estadísticamente significativas en mortalidad, tiempo de estancia en UCI ni en el tiempo en ventilación mecánica. Skoglund y cols (234), evaluaron la interrupción de la sedación en 21 pacientes con hemorragia subaracnoidea o trauma craneoencefálico, encontrando elevación de la presión intracraneal en el 40% de los pacientes, asociándose esto con disminución de la presión de perfusión cerebral en muchos de los casos. Helbok y cols (235), evaluaron el test de despertar en la unidad de cuidado intensivo neurológico, evidenciando disminución significativa de la presión tisular de oxígeno cerebral, elevación de la presión intracraneal, agitación, desaturación sistémica y tendencia a distrés metabólico cerebral. Este último punto fue evaluado más recientemente por Skoglund y cols (236), en 17 pacientes con trauma craneoencefálico y monitoreo multimodal incluyendo micro diálisis, en quienes no evidenciaron diferencias en el metabolismo cerebral a pesar de mantenerse la



constante de elevación de la presión intracraneal durante la interrupción de la sedación. La interrupción de la sedación en pacientes neurocríticos debe reservarse a aquellos pacientes estables, con niveles de presión intracraneal y de presión de perfusión cerebral que se mantengan en metas, normotérmicos, y sin convulsiones (237).

### **¿Cuál es el manejo de sedación recomendado en pacientes adultos con trauma craneoencefálico severo?**

**H4. Se sugiere utilizar medicamentos de vida media corta y de poca acumulación (propofol, dexmedetomidina y remifentanil) que permitan evaluaciones neurológicas frecuentes.** Recomendación condicional, nivel de evidencia bajo.

#### **Justificación:**

Lograr un equilibrio entre el plano adecuado de sedación y el periodo de vigilia para valoración clínica en el paciente que requiere evaluación frecuente del estado neurológico no siempre se alcanza de forma fácil con un solo medicamento y a la fecha no se ha demostrado clara superioridad de un agente sedante sobre otro (238), por lo que con frecuencia se debe recurrir a estrategias de sedación multimodal, en la que se combina más de un medicamento con vida media y de eliminación cortas, con poca acumulación para obtener de forma rápida la remisión de los efectos farmacológicos de la estrategia aplicada y así objetivar el examen neurológico (239)

Los medicamentos con mayor frecuencia de uso para este fin son la dexmedetomidina (226), el propofol (215) y el remifentanil (95,239,240), pues se acercan a las características farmacodinámicas requeridas para este fin. Para la elección del agente principal debe considerarse el contexto clínico del paciente, y el balance entre sedación con analgesia

(remifentanil>dexmedetomidina), y sedación (propofol: no provee analgesia), la necesidad de aplicar periodos con sedación profunda, y lograr el adecuado control del dolor (241). La combinación de estos medicamentos puede proveer de forma adecuada el acierto en las metas individualizadas, con la ventaja de una demanda menor en las dosis totales de cada uno de los medicamentos, exponiendo al paciente a una menor probabilidad de efectos secundarios farmacológicos. Se sugiere implementar protocolos de sedación centrados en el paciente (242–244)

**¿En cuales pacientes que requieran sedación está indicado el uso de dispositivos de monitorización de la actividad cerebral?**

**H5. Se recomienda usar monitorización electrónica de actividad cerebral frontal en pacientes bajo efectos de relajación neuromuscular para evitar infra y sobre-sedación.**

Recomendación fuerte, nivel de evidencia moderado.

**Justificación:**

Las escalas clínicas de sedación/agitación son deficientes en aquellos pacientes bajo sedación profunda y, sobre todo, en pacientes con bloqueo neuromuscular dado que las escalas se basan en la respuesta ocular y motora a estímulos. Es en estos casos en los que un método objetivo para controlar la sedación puede facilitar un ajuste de dosis más apropiado de fármacos sedantes (245). Las herramientas electrónicas de monitorización cerebral continua, podemos considerarlas como aquellas que evalúan predominantemente el estado hipnótico basadas en el electroencefalograma frontal, entre las cuales se encuentran el Índice

Bispectral® (BIS), el Narcontrend Index® (NI), el Patient State Index (PSI) de Sedline-Masimo® y el Neurosenses WAV CNS®.

El uso del BIS puede ser un diferenciador entre sedación profunda óptima y sedación excesiva. Sin embargo, en la sedación superficial puede generar valores erróneos por la interferencia originada desde la actividad muscular frontal (245,246). Es importante subrayar que la sedación por debajo de 40 y el aumento de la tasa de supresiones (porcentaje de EEG isoelectrico) se ha asociado con un aumento de la mortalidad (247).

Wang y cols. evaluaron el nivel de sedación profunda en 90 pacientes críticos ventilados no neurológicos, y compararon el uso de BIS (pre y post-estímulo) y RASS. Encontraron que un BIS basal (pre-estímulo) menor de 50 y un BIS estimulado alrededor de 80 tuvo una sensibilidad del 92% para detectar un puntaje RASS < -3. Los autores proponen el uso combinado de BIS basal de 50 y BIS estimulado de 80 por ser indicadores fuertes de sedación profunda en pacientes ventilados mecánicamente (246).

Aramchandani y cols. encontraron que, para una sedación adecuada, RASS de 0 a -3, el valor medio de BIS era 56 (rango 42 - 89). Un valor de BIS de 70 tenía una sensibilidad del 85% y especificidad del 80% para diferenciar la sedación adecuada (RASS 0 a -3) de inadecuada (RASS +4 a +1). Estos resultados sugieren que el BIS se correlaciona bien con el RASS cuando se evalúa el nivel de sedación en pacientes críticos en ventilación mecánica (245).

Murray y cols. en su trabajo de guías de práctica clínica de BNM en el paciente crítico, no hacen ninguna recomendación sobre el uso de parámetros derivados del

electroencefalograma (BIS, Entropia) como una herramienta para medir la sedación durante la administración continua de NMBA por evidencia insuficiente (248).

West y cols. en un estudio observacional usaron el Neurosense ®, monitor cerebral bilateral de última generación, diseñado con índices independientes para cada hemisferio cerebral, y lo compararon con el uso de RASS, encontraron que los pacientes profundamente sedados tenían una mayor prevalencia de supresión de la actividad eléctrica, (indicador de sedación profunda), con una variabilidad mayor a los valores reportados por el Neurosense, sin encontrar variaciones similares en el RASS. Esto resalta las limitaciones del RASS como una medida independiente de la intensidad de sedación profunda, y sugiere un beneficio potencial de la monitorización cerebral continua adjunta en este escenario (249). A pesar de que el RASS es muy confiable, este puede ser deficiente en casos de sedación profunda y pacientes con bloqueo neuromuscular. El uso de un método objetivo para controlar la sedación, como BIS, en tales situaciones puede conducir a un uso más apropiado y juicioso de los medicamentos sedantes (245,250).

**H6. Se sugiere el uso de monitorización electrónica de actividad cerebral frontal para reducir la dosis de agente sedante en pacientes con sedación profunda.**  
Recomendación condicional, nivel de evidencia bajo.

***Justificación:***

Olson y cols. estudiaron 300 pacientes en ventilación mecánica con diferentes esquemas de sedación (midazolam, propofol, dexmedetomidina y opioides) y evaluaron el nivel de sedación con RASS y BIS. El uso de BIS se asoció con reducción en la dosis de medicamentos cuando los pacientes fueron sedados con propofol (1.61 mg/kg/h vs.

1.77mg/kg/h;  $p < 0.0001$ ), agentes narcóticos como fentanilo (54.73 mcg/h vs. 66.81 mcg/h;  $p < 0.0001$ ) e hidromorfona (0.97mg/h vs. 4.00mg/h;  $p < 0.0001$ ), comparado con el uso de RASS. En contraste, los pacientes sedados con dexmedetomidina recibieron dosis más altas (0.46 mcg/kg/h vs. 0.33 mcg/kg/h;  $p < 0.0001$ ), lo mismo que con lorazepam (4.13 mg/h vs. 3.29 mg/h  $p < 0.0001$ ) y midazolam (3.73 mg/h vs 2.86 mg/h;  $p < 0.0001$ ), cuando el nivel de sedación fue guiado por BIS comparado con RASS. No hubo diferencias en la estancia en UCI, estancia hospitalaria y duración de ventilación mecánica en los grupos ( $p > 0.05$ ) (251).

Le Roux y cols. en su Consenso Internacional de Monitoria Neurológica Multimodal recomiendan monitorizar el nivel de sedación con una escala validada y confiable, como la Escala de Sedación-Agitación (SAS) o la Escala de Sedación de Agitación de Richmond (RASS), y proponen el uso de monitoria de EEG procesado (BIS, Entropía) para reducir las dosis del fármaco sedantes y acelerar el tiempo de despertar en pacientes seleccionados. Esta última recomendación con baja calidad de evidencia (252).

La monitoria electrónica de la actividad cerebral frontal se ha utilizado también como herramienta pronóstica posterior a paro cardiorrespiratorio, como marcador de muerte encefálica, como monitorización en pacientes neurocríticos y/o como indicador del grado de encefalopatía hepática. Estas indicaciones van más allá de los objetivos de estas recomendaciones, existiendo en general escasa evidencia publicada.

**H7. Se sugiere el uso de escalas clínicas validadas para valorar el nivel de sedación/agitación en el paciente crítico en sedación ligera y sin bloqueo neuromuscular.**

Recomendación condicional, nivel de evidencia muy bajo.

**Justificación:**

En la valoración del nivel de sedación/agitación, las escalas clínicas que evalúan la respuesta a estímulos, como las escalas RASS o SAS, no han sido superadas por otras herramientas no clínicas (electrónicas) en la mayoría de los pacientes críticos (251). En ausencia de bloqueo neuromuscular (BNM), la presencia de actividad electromiográfica del músculo frontal, por cualquier motivo, es una causa importante de interpretación errónea de la puntuación del Índice Biespectral (BIS), por lo tanto, su valor es incierto para el control de la sedación en pacientes que no reciben bloqueo neuromuscular (253). Además, el uso de BIS ha mostrado una variedad de resultados en los diferentes estudios, probablemente porque: a) se usan diferentes estrategias de sedación (no comparables entre ellos), b) compara diferentes tipos de pacientes con diferentes condiciones fisiológicas y co-morbididades c) influye la presencia o no de bloqueantes neuromusculares (BNM) (245,246). En pacientes que no reciben BNM, la sedación clínicamente aceptable puede producir una amplia gama de valores en el BIS (254).

El análisis de una gran base de datos de señales de electroencefalograma procesadas de 44 pacientes de la UCI que recibían sedación continua (pero no recibieron BNM) mostró que estos dispositivos no podían discriminar entre la sedación ligera, moderada y profunda, y la puntuación no se alteró con la administración de bolos de drogas sedantes antes de la succión traqueal (255). Arbor y cols. estudiaron 40 pacientes no paralizados y encontraron una superposición extensa de los valores de BIS en cada categoría de escala de agitación y sedación (SAS), aunque observaron una correlación BIS/SAS positiva ( $r = 0.252$ ;  $p < 0.001$ ) (256). Messner y cols. estudiaron tres voluntarios despiertos que no estaban recibiendo sedantes u opiáceos, y encontraron una reducción significativa en la puntuación del BIS después de la administración de un BNM, con puntaje de BIS que no detectó conciencia en

sujetos completamente paralizados (257). De forma similar, en otros estudios los pacientes que recibieron sedación tuvieron una reducción significativa en los puntajes de electroencefalograma procesados después de la administración de un BNM (258–260). Dasta y cols. registraron la puntuación del BIS en 10 pacientes que recibían infusión continua de sedante, opiáceo y BNM durante un período de estimulación externa mínima y observaron una amplia gama de valores de BIS, a pesar de la mínima interferencia electromiográfica (261). Shetty y cols. realizaron una revisión sistemática, no encontrando pruebas suficientes del uso de BIS sobre los desenlaces clínicos (estancia en la UCI, duración de ventilación y eventos adversos) con una evidencia de baja y muy baja calidad derivada de un número limitado de estudios. Adicionalmente, concluyen que encuentran pruebas insuficientes sobre los efectos del uso de BIS en comparación con la evaluación clínica de la sedación en adultos críticamente enfermos en ventilación mecánica (262).

## **Sección 3. ANALGESIA**

### **A. Beneficios y estrategias del adecuado manejo del dolor del paciente en UCI**

**¿Cuál es el beneficio de usar protocolos de analgesia?**

**A1. Se recomienda el uso de protocolos de analgesia y sedación basada en analgesia para el adecuado control del dolor de todos los pacientes críticos que ingresan a la UCI. Recomendación fuerte, nivel de evidencia moderado.**

**A2. Se recomienda la educación y capacitación continua del personal al cuidado del paciente (enfermeras, intensivistas, terapeutas) acerca del protocolo y las opciones de**

**tratamiento disponibles en la institución.** Recomendación fuerte, nivel de evidencia moderado.

### **Justificación:**

La implementación de protocolos para el manejo del dolor ha mostrado ser seguros y efectivos. Disminuyen significativamente el dolor postoperatorio (263), el riesgo de resultados adversos, ayudan a mantener las habilidades funcionales, el bienestar físico y psicológico tanto del paciente como de su familia, mejorando incluso la calidad de vida. También han demostrado un mayor uso de escalas que valoran la presencia de dolor, así como el seguimiento y uso adecuado de dosis de analgésicos. Con el advenimiento de los protocolos de sedación basados en analgesia, se ha logrado demostrar reducción en la aparición del delirium, también justificado por menor uso de benzodiacepinas, menos días en el ventilador y uso reducido de sedantes en infusión continua. Así como menor tiempo de estancia en UCI y en hospitalización (26).

Los protocolos de analgesia han sido ampliamente adoptados en el manejo del paciente crítico, ya que su efectividad en el adecuado control del dolor y mejoría de los resultados clínicos son contundentes (264)(265)(266)(267). El manejo de dolor hace parte fundamental del protocolo ERAS (*Enhanced Recovery After Surgery*) que ha mostrado ser eficiente en mejorar los resultados, garantizando una recuperación funcional más rápida sobre todo en cirugía colorrectal y hepática(268) (269). La educación al paciente dentro del protocolo, permite disminuir el riesgo de efectos adversos y mejora la efectividad del tratamiento del dolor agudo perioperatorio (264)(270).



Para su implementación es importante educar y capacitar al personal nuevo y re-educar periódicamente a todos los que estén involucrados en la atención del dolor, para garantizar la adherencia y conocimiento acerca de las modificaciones o adiciones que se realicen a los protocolos(264).

El manejo inadecuado del dolor ha mostrado diversas complicaciones. El subtratamiento lleva a mayor tiempo en ventilación mecánica, aumento de estancia en UCI, complicaciones tromboembólicas y pulmonares, así como mayor número de extubaciones no planeadas, retiro de catéteres, asincronía paciente – ventilador, agitación, delirium y mayor incidencia de dolor crónico. Por su parte, el manejo exagerado ha mostrado aparición de trastorno de estrés postraumático, deterioro cognitivo, prolongación de ventilación mecánica, neumonías asociadas al ventilador, mayor presencia de úlceras de presión, lesión cerebral, retención urinaria, disminución del tránsito intestinal y alteraciones del sueño (264).

El uso de protocolos ha mostrado mantener las habilidades funcionales, el bienestar físico y psicológico, reduce la profundidad de la sedación y el tiempo de ventilación controlada, minimizando la aparición de delirium, aumentando la seguridad y calidad de vida del paciente (265)(266)(267)(271). Uno de los protocolos más recientemente estudiados es el *bundle ABCDEF*, conocido como “ICU Liberation”, el cuál reúne diferentes estrategias que buscan mantener al paciente activo y despierto, en contacto frecuente con la familia, quienes forman parte del equipo cuidador con el objetivo de mantenerlos cognitivamente estimulados, disminuyendo situaciones que amenacen su autoestima y dignidad humana (271).

Otros beneficios descritos son la mejora en el monitoreo, evaluación y adecuación de la dosis a las necesidades del paciente (272) (273) con un nivel, en general, más ligero de sedación, menos uso de benzodiacepinas y de sedantes en infusión continua; disminuyendo

el tiempo en ventilación mecánica, la aparición de delirium, agitación, estancia en UCI y hospitalización(31) (274) (1) (275) (3) (276). Solo un estudio ha mostrado que el uso de protocolos para el manejo de la sedación, la analgesia y el delirium permite ahorros de casi \$ 1000 US por hospitalización. (6)

### **¿Cuáles son las estrategias de analgesia en el paciente crítico?**

**A3. Se recomienda siempre la evaluación del dolor mediante escalas según las condiciones del paciente.** Recomendación fuerte, nivel de evidencia moderado.

**A4. Se recomienda brindar educación clara acerca de la evaluación, la intervención, las metas y los efectos secundarios de la terapia que se va a instaurar.** Grado de recomendación: fuerte. Recomendación fuerte, nivel de evidencia bajo.

**A5. Se sugiere el uso de analgésicos opioides como parte de unas de las primeras línea de tratamiento analgésico en dolor de origen no neuropático.** Recomendación condicional, nivel de evidencia moderado.

**A6. En caso de requerir opioides, se sugiere usar la menor dosis posible para mantener el paciente confortable.** Recomendación condicional, nivel de evidencia bajo.

**A7. Se recomienda la evaluación periódica de la presencia de dolor para el ajuste adecuado de las dosis.** Recomendación fuerte, nivel de evidencia moderado.

**A8. Se recomienda la administración de analgésicos antes de realizar procedimientos que exacerben el dolor.** Recomendación fuerte, nivel de evidencia moderado.

**A9. Se sugiere el uso de medidas no farmacológicas como musicoterapia, *mindfulness*, electroestimulación y masajes como terapia coadyuvante.** Recomendación fuerte, nivel de evidencia moderado.

**A10. Se sugiere la adopción de estrategia multimodal y/o *bundle* ABCDEF para la promoción de la activación temprana del paciente crítico en la UCI.** Recomendación fuerte, nivel de evidencia moderado.

**Justificación:**

Las estrategias incluyen en primera medida la valoración adecuada de la presencia de dolor mediante escalas fácilmente aplicables y compatibles con las condiciones individualizadas del paciente.

Según las necesidades, la evaluación puede ir seguida de:

- **Educación** acerca de la evaluación, la intervención, las metas y los efectos secundarios de la terapia que se va a instaurar
- **Analgésicos** según la disponibilidad de uso por vía oral, enteral o intravenosa
- **Técnicas multimodales** (administración de 2 o más medicamentos que actúan en diferentes vías)
- Uso de **opioides sistémicos** intermitentes o en infusión continua
- **Técnicas analgésicas regionales**
  - central (truncular central)
  - periféricas (bloqueos e infiltración de anestésicos locales)
- **Medidas no farmacológicas**

Gran parte de los pacientes críticos se encuentran en situaciones clínicas con imposibilidad para la adecuada comunicación con su entorno, lo que dificulta conocer su estado de comodidad, sus quejas y percepciones acerca de la enfermedad. Existen múltiples herramientas que permiten una valoración confiable acerca de la presencia de dolor. Sin embargo, no existe una escala universalmente aceptada. La escala verbal numérica es la más

usada para quienes pueden comunicarse, mientras que, en pacientes bajo intubación oro traqueal la escala de dolor conductual (por sus siglas en inglés: *BPS. Behavioural pain scale*) y la herramienta de observación del dolor crítico (por sus siglas en inglés: *CPOT. Critical-Care Pain Observation Tool*) se consideran las más válidas y confiables (277) (278). Lo importante es usar una herramienta fácil de aplicar, que objetivise (materialice o verbalice) el dolor del paciente.

Es importante conocer las condiciones y necesidades individuales de cada paciente para realizar la evaluación y el seguimiento de la terapia instaurada. El control del dolor debe ir acompañado de una conversación periódica del prestador, el paciente y la familia junto con la adherencia a los protocolos institucionales (279).

Brindar adecuada educación, conocer los objetivos de tratamiento del paciente, la vía de administración disponible, lo que le genera temor y lo que le disminuye el dolor, permite realizar una intervención personalizada y ajustada(274) (280). Monitorizar la eficacia, los signos de toxicidad y las reacciones adversas a los medicamentos, permiten un mejor control de dolor, disminuye el porcentaje de riesgo asociado al contacto con nuevos analgésicos e influye positivamente en los resultados clínicos(1) (281).

Los procedimientos que se llevan a cabo en una UCI tienen riesgos potenciales inherentes a la atención del paciente los cuales exacerban el dolor; dentro de los más reconocidos se encuentran la punción arterial, el retiro de tubo de tórax o drenes de heridas(282) e incluso el solo movimiento en la cama puede generar ansiedad en el paciente. Estudios han demostrado que, dependiendo el procedimiento, el ofrecer una explicación apropiada, administrar analgésicos como la morfina o el ketorolaco o el uso de técnicas no farmacológicas previo a su realización logran atenuar el dolor peri-procedimental(283)(284).

Los opiáceos intravenosos son los analgésicos de primera línea para el tratamiento del dolor no neuropático, esto con el fin de reducir el uso de sedantes como propofol y midazolam que dificultan la interacción activa del paciente con su entorno, retrasando la rehabilitación y aumentando el riesgo de delirium(26) (285). La adición de analgésicos no opiáceos como acetaminofén, gabapentinoides, clonidina, dexmedetomidina, infusiones de ketamina o lidocaína reducen la cantidad total de opioide(242).

La estrategia *eCASH* y el *bundle ABCDEF* tienen como objetivo la minimización del uso de opioides y benzodiacepinas en un enfoque de analgesia multimodal que le permita al paciente sentirse cómodo con mínimas o nulas cantidades de sedación siempre y cuando las condiciones clínicas lo permitan; que, junto con el uso de otras maniobras no farmacológicas disminuyen el desacondicionamiento y aumentan la reactivación temprana del paciente(4) (271).

Si bien, la analgesia epidural es otra estrategia dentro del enfoque multimodal para el control del dolor que ha mostrado resultados positivos en manejo de dolor perioperatorio, las publicaciones en UCI se limitan a reportes de caso, estudios de corte o recomendación de expertos(286).

Dentro de las opciones de medidas no farmacológicas, se encuentra la estimulación eléctrica transcutánea que en UCI ha sido estudiada para mejorar la rehabilitación muscular, y el manejo de dolor postoperatorio de cirugía cardíaca(287), de próstata(288), tórax y laparoscopia(289), con resultados prometedores en costo-efectividad hasta hace aproximadamente 5 años, sin evidencia de su uso en recientes estudios. El masaje sumado a manejo farmacológico en cirugía cardíaca ha mostrado disminución en la intensidad del

dolor(290). La musicoterapia mejora la calidad del sueño, el control del dolor y reducción del tiempo en ventilación mecánica(291) (292,293)

**¿Cuáles son los beneficios de optimizar el uso de opioides en pacientes críticos y quienes son los que más se benefician?**

**A11. Recomendamos que se usen las menores dosis de opioides para conseguir el objetivo terapéutico y sólo por el menor tiempo necesario.** Recomendación fuerte, nivel de evidencia moderado.

### **Justificación:**

Existe una creciente preocupación internacional por el sobre uso de opioides y un llamado a intentar racionalizar su uso (guía CDC). Además, nuevas evidencias muestran que: a) el uso de bolos menores de morfina (2.5 mg vs. 7.5 mg) pueden ser igual de efectivos (294) , b) que el uso de opioides de vida media de contexto menor pueden reducir la estancia en UCI y en el ventilador (285), c) que la asociación de acetaminofén, (295) dexmedetomidina o gabapentin (296) pueden optimizar la terapia, y el uso de lidocaína puede ser una buena alternativa analgesia en ciertos casos (297), y d) que la angustia tiene una asociación mutua con el dolor en pacientes críticos (298). Dentro de las estrategias para disminuir el uso de opioides y sus riesgos en el paciente grave se han descrito: a) el uso de escalas para ajustar las dosis a los objetivos terapéuticos de la analgesia, b) evitar las dosis excesivas, c) limitar, en lo posible, los días de tratamiento, d) definir en cada caso el fármaco y la forma de administración, en bolos o en infusión, e) reducir progresiva y gradualmente los opioides, f) valorar el manejo multifactorial del dolor con el empleo de terapias no farmacológicas como tratamientos físicos, y tratamiento conductual, o g) con analgésicos no

opioides como acetaminofén, o dexmedetomidina, o ciertos medicamentos “adyuvantes” como antidepresivos o anticonvulsivantes (13).

**¿Cuál es la estrategia para el manejo del dolor del paciente críticamente enfermo que no tiene soporte ventilatorio?**

La estrategia general para manejar el dolor en pacientes críticamente enfermos no intubados es hacer una evaluación adecuada del dolor y utilizar un enfoque analgésico multimodal para reducir el uso de opiáceos y sus efectos secundarios. Por lo tanto:

**A12. Se recomienda el monitoreo rutinario del dolor en la UCI, evaluado por una herramienta validada, con los objetivos de mejorar el manejo del dolor y el uso más eficiente de los analgésicos.** Recomendación fuerte, nivel de evidencia moderado.

**A13. Se recomienda estratificar a los pacientes según su tipo de dolor (p. ej., Agudo, subagudo, crónico, neuropático o no neuropático) e intensidad (p. ej. leve 0-3, moderada a grave > 4/10) de su dolor, así como su exposición previa a los opiáceos (p. ej., primera ocasión versus tolerante) para elegir la opción terapéutica más adecuada (ver abajo).** Recomendación fuerte, nivel de evidencia moderado.

**A14. Se recomienda el uso de analgesia multimodal con el propósito de controlar el dolor en el paciente crítico sin ventilación mecánica y reducir el uso de opiáceos en esta población** Recomendación fuerte, nivel de evidencia moderado.

***Justificación:***

Los pacientes críticamente enfermos sufren y reportan dolor en todo momento en la UCI. Se puede producir un dolor moderado a severo durante algunos procedimientos (p. Ej., Cuidado de heridas, inserción de sonda de catéter o toracostomía), durante la movilización en presencia o no de fracturas u otras lesiones agravantes (299), e incluso durante el reposo, el cual se ha reportado hasta en el 50% de los pacientes (300,301). Por lo tanto, la evaluación y el control del dolor cada hora en la UCI se han convertido en una práctica estandarizada supervisada por la *Joint Comission* en EE. UU. (302). Una revisión sistemática reciente indicó que las evaluaciones periódicas del dolor, no solo ayudaron a lograr un mejor control del dolor, sino también, generaron un uso más eficiente de analgésicos y sedantes (270).

Se puede obtener un control adecuado del dolor con una combinación de analgésicos orales o intravenosos (opioides y no opiáceos), bloqueos regionales cuando esté indicado, otros medicamentos adyuvantes como ketamina o lidocaína intravenosa y otras terapias complementarias (181,303–307). Este enfoque se llama analgesia multimodal; la combinación estratégica de medicamentos y modalidades alternativas puede ayudar a reducir los efectos secundarios de cada uno de ellos por separado (por ejemplo, reducir el uso de opioides combinándolos con antiinflamatorios puede ayudar a reducir la depresión respiratoria) (286,308,309). La lista de posibles efectos secundarios de los opioides incluye, entre otros, supresión inmunitaria, íleo, estreñimiento, tolerancia analgésica o hiperalgesia, abstinencia y otros. El objetivo de la evaluación adecuada, incluido el tipo de dolor (neuropático o no, agudo o no), y la intensidad del dolor (leve 0-3, moderado a severo > 4-10), es elegir adecuadamente el analgésico correcto y su dosis o la mejor combinación de analgésicos.

## **B. Analgesia en paciente con Compromiso cardiovascular.**



## ¿Cuál es el manejo del dolor en pacientes con enfermedad coronaria?

**B1. Se recomienda evitar el uso de morfina de forma rutinaria en pacientes con infarto agudo de miocardio.** Recomendación fuerte, nivel de evidencia moderado.

### *Justificación:*

Desde principios del siglo XX la morfina ha jugado un papel central en la estrategia de control del dolor en el paciente con infarto agudo de miocardio (IAM), en relación con sus efectos en la presión arterial, la frecuencia cardíaca, la ansiedad y la demanda de oxígeno miocárdico; esto basado en las conclusiones del trabajo realizado por Thomas y cols. en 1965 (310). Sin embargo, actualmente la evidencia no apoya estas ventajas. En 2005 Meine y cols. (311) publicaron los resultados de un análisis retrospectivo del registro nacional de pacientes con IAM sin elevación del ST (SEST), en 443 hospitales en los Estados Unidos entre enero de 2001 y junio de 2003 recolectando 57.039 pacientes. Encontraron que los pacientes que recibieron morfina presentaron mayor riesgo de morir (OR: 1.48 IC95%: 1.33-1.64), que los pacientes que no la recibieron, mayor riesgo de shock cardiogénico y de insuficiencia cardíaca congestiva. En contraparte, en 2016 Puymirat y cols. (312), evaluaron las complicaciones intrahospitalarias del uso de morfina pre hospitalaria en pacientes con IAM con y sin elevación del ST derivados del registro francés durante 2010, incluyendo datos de 4169 pacientes sin evidenciar diferencias en desenlaces adversos especialmente en pacientes con elevación del ST.

A pesar de esta evidencia “conflictiva”, la preocupación de la decisión radica en los estudios de farmacodinamia y farmacocinética, en referencia a las interacciones de la morfina con los antiagregantes plaquetarios. Parodi y cols. (313), en el estudio RAPID aleatorizaron

50 pacientes con IAM-CEST para recibir Prasugrel o ticagrelor, evaluando la reactividad plaquetaria residual como indicador de la efectividad del antiagregante. Identificaron que el uso de morfina se asoció con retardo en el inicio de la actividad antiplaquetaria de forma independiente en los dos grupos (OR: 5.29 IC95%: 1.44-19.49). Montalescot y cols. (314), en un ensayo controlado aleatorizado que comparó el ticagrelor prehospitario vs intrahospitalario, en pacientes con IAM-CEST, con el objetivo primario de identificar mejoría en la reperfusión coronaria, encontraron que el subgrupo de pacientes que no recibieron morfina presentó descenso del segmento ST al administrar ticagrelor pre hospitalario de forma más eficaz que aquellos que recibieron morfina. Hobl y cols. (315), en un ensayo controlado aleatorizado, compararon específicamente las interacciones entre morfina y clopidogrel, por medio de espectrometría de masas y pruebas de función plaquetaria en 24 sujetos, sanos que recibieron una dosis de carga de 600 miligramos de clopidogrel, más morfina o placebo. Se evidenció como la administración de morfina retrasó la absorción del clopidogrel, disminuyó los niveles plasmáticos de su metabolito activo y mayor agregación plaquetaria residual que el grupo placebo, sugiriendo que esto podría explicar el fallo terapéutico en pacientes susceptibles. Posteriormente el grupo de Parodi y cols. publican un análisis exploratorio con datos de tres ensayos clínicos en pacientes con IAM-CEST que recibieron Prasugrel o ticagrelor más morfina, en el que se identificó que la reactividad plaquetaria residual fue más alta en el grupo que recibió morfina independiente del antiagregante plaquetario (53% vs 29%), infiriendo asociación entre el uso de morfina y el retraso en el inicio de acción biológica de los antiagregantes plaquetarios (316). Más reciente, Kubica y cols. (317), en el ensayo clínico aleatorizado, doble ciego IMPRESSION, compararon los efectos de la morfina vs placebo en 70 pacientes con IAM quienes recibieron

dosis de carga de ticagrelor, de nuevo evidenciando retraso en el inicio de acción del antiagregante plaquetario en el grupo que recibió morfina.

**B2. Se recomienda hacer uso de estrategias para el control del dolor alternativas a la morfina en pacientes con infarto de miocardio, incluyendo el uso de los nitratos y beta bloqueadores.** Recomendación fuerte, nivel de evidencia moderado.

***Justificación:***

El dolor torácico en el paciente con IAM está relacionado con la isquemia de los territorios comprometidos, por lo tanto, las estrategias de reperfusión son el componente más importante en el tratamiento en pacientes con IAM-CEST e IAM-SEST de alto riesgo. En pacientes con IAM-SEST de bajo riesgo, el uso de beta-bloqueadores (BB), y nitratos logran control de los síntomas asociados a la isquemia (318). Everts y cols. (319), realizaron un ensayo controlado, aleatorizado, doble ciego comparando morfina contra metoprolol endovenoso, como estrategias para el control de dolor en pacientes con IAM. Aunque se logró control del dolor en una proporción más alta en el grupo en el que se aplicó morfina durante los primeros 80 minutos, posteriormente no se evidenció diferencia entre los grupos durante las 24 horas del periodo de observación, ni se identificaron diferencias en mortalidad estadísticamente significativas.

La nitroglicerina fue evaluada en un estudio retrospectivo en pacientes con dolor torácico en el escenario prehospitalario (320). 1662 pacientes recibieron nitroglicerina sublingual, en quienes la calificación del dolor mejoró de 6.9 a 4.4 y el 10 % registró total control del dolor. Los nitratos y los BB pueden mejorar el dolor y los síntomas asociados con la isquemia miocárdica en ausencia de contraindicaciones, y están incluidos dentro de las

estrategias recomendadas para disminuir el dolor torácico en pacientes con IAM en las guías de las Sociedades Americana y Europea del Corazón (318,320).

**B3. Se sugiere restringir el uso de morfina en pacientes con infarto agudo de miocardio con elevación del ST en casos de persistencia de dolor severo ( $VAS \geq 7$ ), a pesar del inicio de terapias anti isquémicas y antitrombóticas.** Recomendación condicional, nivel de evidencia bajo.

***Justificación:***

En consideración a los hallazgos referidos previamente en el efecto de la morfina en el retraso del inicio de acción biológica de los antiagregantes plaquetarios, Conti y Parodi (321,322), en dos revisiones editoriales independientes consideran que la morfina debería reservarse a aquellos casos en los que el paciente persiste con dolor torácico severo (definido como una calificación mayor o igual a 7 en la escala numérica del dolor) y donde ya se haya usado una estrategia inicial basada en la administración temprana de ácido acetilsalicílico, medicamentos anti isquémicos, beta bloqueadores, nitratos y, en ocasiones acetaminofén endovenoso. Se resalta nuevamente que, la reperfusión es la estrategia definitiva para el control del dolor torácico en el paciente con IAM, pues se debe resolver la isquemia miocárdica. Parodi propone un algoritmo de manejo del dolor torácico en pacientes con IAM-CEST el cual se presenta en la figura 1. (321).

**B4. Se sugiere el uso de acetaminofén como estrategia analgésica en los pacientes hipertensos con riesgo cardiovascular.** Recomendación condicional, nivel de evidencia bajo.

***Justificación:***

El acetaminofén se ha evaluado objetivamente en pocos escenarios de pacientes con enfermedad cardiovascular. Fulton y cols. (323), realizaron un análisis retrospectivo de una cohorte de 24.496 pacientes hipertensos mayores de 65 años en el Reino Unido, de los cuales 10.878 recibió acetaminofén sin evidenciar asociación con eventos cardiovasculares mayores infarto de miocardio (RR 0.98; IC95% 0.76-1.27), accidente cerebrovascular (RR 1.09; IC95% 0.86-1.38), u otros eventos cardiovasculares (RR 1.17; IC95% 0.99-1.37), por lo que parece que el acetaminofén podría ser seguro en este grupo de pacientes.

**B5. Se sugiere evitar el uso de AINE como estrategia analgésica de uso prolongado en los pacientes hipertensos crónicos con enfermedad coronaria.** Recomendación condicional, nivel de evidencia bajo.

***Justificación:***

En un análisis *post hoc* del estudio INVEST (INternational Verapamil-Tandolapril Study), en el grupo de pacientes con historia de hipertensión arterial y enfermedad coronaria, el uso crónico de Anti Inflamatorios No Esteroideos (AINE), se asoció a un aumento estadísticamente significativo en el riesgo de muerte de origen cardiovascular (RR 2.26; IC95% 1.70-3.01;  $p=0.0001$ ). Por lo que se recomienda evitar esta estrategia en los pacientes que requieran manejo farmacológico del dolor crónico o de uso prolongado (324).

## **¿Cuál es el manejo de la analgesia recomendado en pacientes adultos con inestabilidad hemodinámica?**

**B6. Se sugiere usar ketamina como parte de las estrategias analgésicas para el paciente con inestabilidad hemodinámica.** Recomendación condicional, nivel de evidencia moderado.

### ***Justificación:***

En un **meta-análisis** de ensayos clínicos y observacionales de pacientes con trauma, se evidenció que la ketamina fue el medicamento aplicado para sedo-analgesia con menor proporción de eventos de hipotensión, incluso en combinación con morfina. Adicionalmente esta combinación presentó un control del dolor más eficaz que la ketamina sola. Desde el punto de vista hemodinámico, se ha encontrado una tendencia al aumento en la presión arterial media, y los efectos hemodinámicos cerebrales parecen ser mínimos (181,325). La ketamina en dosis *analgésicas* apropiadas, bajo vigilancia clínica de síntomas disociativos, parece ser una estrategia segura en pacientes con inestabilidad hemodinámica, y parece disminuir la necesidad de vasopresores y de opioides en el paciente críticamente enfermo.

**B7. Se sugiere precaución con la aplicación de acetaminofén endovenoso en pacientes con inestabilidad hemodinámica.** Recomendación condicional, nivel de evidencia bajo.

### ***Justificación:***

Kelly y cols. (326), en un estudio aleatorizado determinaron la proporción de incidencia de hipotensión en 50 pacientes que recibieron acetaminofén endovenoso u oral (2.94; IC95% 0.97-8.92:  $p=0.06$ ). Aunque no es clara la causa de este efecto, el paciente inestable en la Unidad de Cuidados Intensivos puede presentar cambios en el volumen de distribución, la

capacidad de aclaramiento de fármacos, compromiso en la función hepática entre otros. Sin embargo, es posible que esté en relación con el pico plasmático y con la velocidad de administración. Aunque se requieren más estudios, se sugiere administrar con precaución a los pacientes con inestabilidad hemodinámica.

### **C. Analgesia en paciente con sepsis y shock séptico.**

#### **¿Cuál es el manejo de la analgesia recomendado en pacientes adultos con sepsis y shock séptico?**

Dos grupos de trabajo internacionales sobre sepsis (2004, 2012) no hicieron recomendaciones específicas para el manejo del dolor en el paciente séptico. Solo se realizaron recomendaciones para la sedación y el bloqueo neuromuscular debido a que hacen falta estudios que aborden el tema de la analgesia.

La estrategia general para manejar el dolor en pacientes críticamente enfermos sépticos es hacer una evaluación adecuada del dolor y utilizar un enfoque analgésico multimodal para reducir el uso de opiáceos y sus efectos secundarios. Por lo tanto:

**C1. Se recomienda el monitoreo rutinario del dolor en la UCI, evaluado por una herramienta validada, con los objetivos de mejorar el manejo del dolor y el uso más eficiente de los analgésicos.** Recomendación fuerte, nivel de evidencia moderado.

**C2. Se sugiere estratificar a los pacientes según su tipo de dolor (p. Ej., Agudo, subagudo, crónico, neuropático o no neuropático) e intensidad (leve 0-3, moderada a grave > 4/10) de su dolor, así como su exposición previa a los opiáceos (p. ej., primera**

**ocasión versus tolerante) para elegir la opción terapéutica más adecuada (ver abajo).**

Recomendación condicional, nivel de evidencia moderado.

**C3. Se sugiere el uso de analgesia multimodal con el propósito de controlar el dolor en el paciente crítico sin ventilación mecánica y reducir el uso de opiáceos en esta población.** Recomendación condicional, nivel de evidencia moderado.

#### **Justificación:**

En 2004, Vender y cols. publicaron una revisión basada en la evidencia sobre el uso de sedación, la analgesia y el bloqueo neuromuscular en sepsis (327). Concluyeron que no había sedantes o analgésicos preferidos en esta población de pacientes. En 2013, Dellinger y cols. y en 2017 Rhodes y cols. publicaron las guías internacionales, basadas en evidencia, para el manejo de pacientes con sepsis grave y shock séptico (328,329). Este equipo de trabajo solo proporcionó recomendaciones para la minimización de la sedación y la eliminación de los bloqueantes neuromusculares, con la excepción de aquellos pacientes con hipoxemia grave y SDRA inducido por sepsis durante 48 horas.

El uso de analgesia epidural para pacientes con sepsis sometidos a laparotomía se ha estudiado en el Reino Unido (330). Los autores encontraron que solo el 2% de los hospitales encuestados tenían pautas para el uso de analgesia epidural en la sepsis. Entre los anestesiólogos que usaron analgesia epidural, el 82% lo usaría en pacientes sin signos de respuesta inflamatoria sistémica. Se plantearon serias preocupaciones sobre su uso, dados los riesgos de absceso epidural y la posibilidad de causar una mayor inestabilidad hemodinámica. Sin embargo, recientemente se ha sugerido el uso de la analgesia epidural torácica como posible beneficio en pacientes con pancreatitis aguda (331), e incluso se ha utilizado en



pacientes sépticos (332). En un estudio observacional reciente, Jabaudon describió 121 pacientes, de los cuales el 60% cumplía los criterios de sepsis, el 42% de sepsis grave y el 22% de shock séptico (332); esta serie tuvo un 0.8% de absceso epidural y un 8% de complicaciones de hipotensión asociada a la analgesia epidural. Esta práctica no parece apropiada en pacientes sépticos críticamente enfermos, aunque sean pacientes quirúrgicos o no.

No está claro si algunos opiáceos tienen asociaciones con una mejor analgesia y una menor mortalidad. Un estudio muy pequeño y retrospectivo, publicado como un capítulo en un libro de terapia antibiótica, comparó el fentanilo con sufentanilo en dos grupos de 12 pacientes con shock séptico, y reportaron posibles beneficios del sufentanilo, sin embargo, estos hallazgos deben ser corroborados (333).

## **D. Analgesia en paciente con SDRA y ECMO.**

**¿Cuál es la estrategia del manejo analgésico recomendada en pacientes adultos con SDRA?**

En general, la mejor estrategia para proporcionar analgesia en pacientes con SDRA es usar un abordaje multimodal para reducir la utilización de opiáceos y sedantes, y considerar las recomendaciones hechas para pacientes que requieran ECMO.

**D1. Se recomienda el uso de opioides (con especial consideración por remifentanil) para proporcionar analgesia en el dolor agudo. Realizando los ajustes de las dosis de acuerdo con la etapa del proceso patológico y las necesidades específicas de los pacientes con SDRA grave. Recomendación fuerte, nivel de evidencia moderado.**

**D2. Se sugiere evitar dosis altas de remifentanil para prevenir la controvertida hiperalgesia asociada con su uso.** Recomendación condicional, nivel de evidencia bajo.

**Justificación:**

Las guías de manejo de pacientes adultos con síndrome de dificultad respiratoria aguda de la Sociedad Europea, la Sociedad de Medicina de Cuidados Críticos (en inglés, SCCM) y la Sociedad Torácica Americana (en inglés, ATS) no abordaron esta pregunta (334). En general, esta población de pacientes entra en la categoría de pacientes críticamente enfermos con ventilación mecánica, por lo tanto, se manejan como tales. Sin embargo, los pacientes con SDRA con hipoxemia severa están expuestos a intervenciones como ECMO que requieren dosis más altas de analgésicos y sedantes (334). Olafson y cols. demostraron una diferencia significativa en los requerimientos de analgésicos y sedación en pacientes con SDRA secundario a neumonías bacterianas, en comparación con aquellos con neumonía viral ( $p=0.002$ ) y por H1N1 ( $p<0.001$ ) (335). Estos resultados apoyan la necesidad de la estratificación del paciente de acuerdo con una evaluación más completa del tipo de dolor en lugar de un enfoque o protocolo único.

Un meta-análisis reciente no mostró diferencias en los requerimientos de dosis de sedación y analgesia entre grupos de pacientes ventilados con volúmenes  $\leq 6$  cc / kg, 6-10 cc kg y  $\geq 10$  cc / kg, a pesar de que el grupo de volumen corriente inferior tuvo significativamente menos días de requerimiento del ventilador (336). Otra intervención en estos pacientes es el uso de bloqueadores neuromusculares (NMB) (337–339). Forel y cols. aleatorizaron a 36 pacientes usando sedación con midazolam en un rango de 3 a 30 mg / hora y analgesia con sufentanil de 10 a 150 microgramos / hora, para alcanzar un puntaje de

Ramsay de 6 antes de paralizar a los pacientes (337). Guervilly y cols. utilizaron un enfoque similar con midazolam y sufentanil. Cuando el objetivo de sedación no se logró, los autores utilizaron una infusión de ketamina para lograr el mismo puntaje de Ramsay (338). En un tercer estudio, Papazian y cols. aleatorizaron 340 pacientes a cisatracurio o placebo después de alcanzar una puntuación de Ramsay predeterminada de 6. Sin embargo, los autores no describieron la metodología (339), dado que estos fueron realizados por el mismo grupo, suponemos que utilizaron el mismo protocolo de sedo-analgesia. Estos estudios usaron sedación profunda y analgesia antes y durante la parálisis en las primeras etapas del SDRA con una mejoría en la supervivencia, e indican que pueden ser necesarias dosis altas de analgésicos mientras que no sea posible evaluar adecuadamente el dolor por el estado de parálisis muscular.

En relación con el uso de sufentanil como opioide preferido, y sabiendo que el remifentanil se asocia con una recuperación más rápida de la sedación y la analgesia (340), una de las limitaciones para su uso ha sido el aumento de los costos. Con respecto a esta preocupación, Al y cols. reportaron una disminución significativa en los costos totales de la UCI con una sedo-analgesia basada en remifentanilo en comparación con la analgesia y sedación convencional para pacientes con ventilación mecánica (341). Los autores, utilizando un modelo de Markov, encontraron una diferencia en costos de 1.474 euros. También encontraron una diferencia en el promedio de tiempo de estancia en UCI de 7.6 días en el grupo de remifentanilo versus 8.5 días en el grupo de sedación/analgesia convencional. En un metanálisis reciente, Zhu y cols. analizaron el resultado de 23 estudios controlados aleatorizados y encontraron que, en comparación con otros opiáceos, el remifentanilo se asoció significativamente con una reducción en: a) días en ventilación (diferencia de

promedios -1.46; IC del 95%, -2.44 a -0.49; I2 89%), b) tiempo hasta la extubación después del cese de la infusión (diferencia de promedios -1.02, IC 95%, -1.59 a -0.46; I2 96%), y c) tiempo de estancia en UCI (diferencia de promedios -0.10; IC del 95%, -0.16 a -0.03; I2 85%) (90).

Los opioides se han asociado con efectos colaterales como dependencia y adicción (342). Recientemente se ha reportado que se pueden inducir tolerancia aguda e hiperalgesia (342). Sin embargo, no hay suficiente evidencia sobre la frecuencia e importancia de la hiperalgesia ni mucho menos sobre su impacto clínico (97,343). Como la presentación de la hiperalgesia es dosis y tiempo dependiente, es fundamental monitorizar los efectos de esta medicación pues si bien las dosis en UCI son menores, el tiempo es mucho más prolongado que en anestesia (97,343). Tal monitoreo es más importante cuando se sobrepasan dosis de 0.25 microgramos/kg/min (97,342,343). En este caso se sugiere asociar otra medicación para lograr las metas de sedo-analgesia (97,342,343).

### **¿Cuál es la estrategia del manejo analgésico recomendada en pacientes en ECMO?**

**D3. Se sugiere evitar el uso de analgésicos lipofílicos (por ejemplo Fentanil) debido al grado de atrapamiento por el circuito.** Recomendación condicional, nivel de evidencia bajo.

**D4. Se sugiere el uso de analgésicos preferiblemente no lipofílicos (por ejemplo, morfina).** Recomendación condicional, nivel de evidencia bajo.

**D5. Se sugiere ajustar las dosis de analgésicos en función del tiempo en ECMO, si los circuitos son nuevos o viejos, y si el ECMO es veno-venoso o veno-arterial.** Recomendación condicional, nivel de evidencia bajo.

**Justificación:**

En general, la mejor estrategia para proporcionar analgesia en pacientes en ECMO es evitar los analgésicos lipófilicos (p. Ej., Fentanil) debido al grado de atrapamiento por el circuito y/o a la necesidad de vigilar estrechamente el dolor de los pacientes para ajustar la dosis durante el tiempo y el tipo de ECMO (VV o VA).

Estudios recientes han identificado un desafío significativo para lograr niveles terapéuticos de medicamentos mientras se usa la oxigenación por membrana extracorpórea (en inglés, ECMO), incluidos analgésicos, sedantes, antibióticos y otros (344,345). En un experimento ex vivo, Shekar y cols. describieron cómo el fentanil, un opiáceo lipofílico, quedó atrapado por el circuito hasta en un 97% en comparación con la morfina no lipofílica atrapada en solo el 3% en un período de 24 horas (344). Los sedantes también se vieron afectados significativamente con una caída del 100% en los niveles de midazolam. En otro estudio, Shekar y cols. demostraron cómo los pacientes en ECMO aumentaron los requerimientos de sedación y analgésicos a lo largo del tiempo (345). Mostraron una disminución en los niveles plasmáticos de morfina de hasta 20%, con un aumento significativo en las dosis en comparación con los requisitos pre-ECMO.

En un estudio usando un modelo in vitro, Wagner y cols. mostraron que los niveles de dexmedetomidina disminuyeron significativamente, lo que indicó que es necesario un ajuste de dosis durante el tiempo del soporte, esto es muy probable que sea secundario a la

absorción por los tubos de cloruro de polivinilo (PVC) (346). Shekar y cols. en un estudio retrospectivo de 29 pacientes en ECMO [13 veno-venosa (VV) y 16 veno-arterial (VA)], también mostraron un aumento en las dosis de midazolam (18 mg;  $p=0.001$ ) y morfina (29 mg;  $p=0.02$ ) a lo largo del tiempo. De forma interesante, los pacientes en ECMO VV necesitaron dosis más altas en su estudio (175); DeGrado y cols. corroboraron este hallazgo (347). En un estudio observacional prospectivo de 32 pacientes en ECMO (17 VV y 15 VA), encontraron que los pacientes en ECMO VV requirieron dosis significativamente más altas de opiáceos y sedantes que con ECMO VA, 2.650 versus 6.000 microgramos de equivalentes de fentanil, y 34 versus 48 mg de equivalentes de midazolam, respectivamente. En este grupo, 10 pacientes tuvieron que cambiarse de fentanil a hidromorfona (9 en VV y 1 en VA).

Nigoghossian y cols. en un análisis multivariado de un estudio retrospectivo comparativo de pacientes ventilados versus pacientes en ECMO, encontraron que los pacientes que requieren dosis altas de fentanil y la edad (pacientes más jóvenes) se asociaron, independientemente, con una dosis aumentada de los requerimientos de sedantes máximos de 6 horas (180). Aunque algunos han sugerido que la ketamina podría reducir las dosis de opiáceos y sedantes durante el soporte con ECMO (177), un estudio aleatorizado reciente de 20 pacientes que intentó responder a esta pregunta, mostró que la adición de ketamina no redujo las necesidades analgésicas o sedantes (348). Todos estos estudios sugieren claramente que se deben hacer ajustes significativos a los medicamentos durante la terapia de soporte con ECMO, y que la elección del fármaco, el tiempo en ECMO y el tipo de soporte (VV o VA) también son importantes para lograr niveles terapéuticos adecuados.

## **E. Analgesia en paciente Oncológico y al final de la vida.**

## **¿Debe evaluarse la presencia de dolor en los pacientes al final de la vida con limitación del esfuerzo terapéutico (LET)?**

**E1. Se sugiere evaluar la presencia de dolor, agitación y dificultad respiratoria de modo protocolizado en los pacientes al final de la vida. En los pacientes que presenten dificultades para comunicarse sugerimos evaluar signos objetivos de dolor y dificultad respiratorios. Recomendación condicional, nivel de evidencia bajo.**

### **Justificación:**

El sufrimiento durante la atención de los pacientes irrecuperables al final de su vida en las Unidades de Cuidados intensivos es frecuente, llegando hasta el 20% (349). Este tema tiene implicaciones médicas, éticas y legales, por lo que diversas sociedades de Medicina Crítica han publicado Guías al respecto, buscando asegurar una atención sanitaria de calidad, que priorice detectar y evitar el sufrimiento (349–353). Treece y cols. (354) documentaron mayor satisfacción de los médicos y enfermeras al desarrollar un protocolo de limitación del esfuerzo terapéutico (349). El manejo adecuado del dolor comienza con el reconocimiento, la evaluación y el control del dolor.

Logrando el manejo adecuado del dolor comienza con el reconocimiento, la evaluación y el control del dolor (349). Los profesionales deben intentar obtener un autoinforme del paciente, pero además estar alertas a identificar las condiciones que puedan causar dolor y observar signos de sufrimiento (349,350,353,355), (Ej, taquipnea, taquicardia, diaforesis, uso de músculos accesorios, aleteo nasal, muecas, rigidez, temblor, cierre de los ojos, apretar los puños, verbalización del dolor y gemidos). Evaluar el dolor en el paciente que no puede comunicarse es una especial preocupación (356), ya que la incapacidad para

comunicarse no es rara en los últimos días de la vida (349,351). Diversas escalas objetivas se han propuesto para realizar esta evaluación, como la Escala Conductual del Dolor (BPS) o el Instrumento de Observación del Dolor en Cuidados Críticos (CCPOT), el Score de Agitación-Sedación (SAS) o la Escala de Ramsay para la Agitación-Sedación (RASS) se han usado para medir la agitación y la Escala de Observación del Distrés Respiratorio (RDOS), para objetivar la dificultad respiratoria (349,353).

**¿Cuál es el objetivo del tratamiento analgésico en los pacientes al final de la vida con limitación del esfuerzo terapéutico (LET)?**

**E2. Se sugiere que el objetivo del tratamiento farmacológico durante la LET busque prevenir y tratar el dolor y otros síntomas como la angustia o la dificultad respiratoria. Cuando se administre un tratamiento, se recomienda dejar registrada su justificación.**  
Recomendación condicional, nivel de evidencia muy bajo.

#### **Justificación:**

La limitación del esfuerzo terapéutico al final de la vida es hoy en día un proceso bien planificado (349–353), pero los pacientes pueden seguir presentando sufrimiento debido a disnea, dolor, acumulación de secreciones u otros síntomas (349). De acuerdo con la Organización Mundial de la Salud (OMS), los cuidados paliativos tienen como objetivo “prevenir y aliviar el sufrimiento, buscando la identificación, evaluación y tratamiento del dolor y otros tipos de angustia física, psicológica, emocional y espiritual” (357). Los médicos tenemos la obligación ética y legal de aliviar dichos síntomas y preparar a las familias para acompañar este proceso. Existe consenso en los expertos que se deben usar



medicamentos para tratar esos síntomas que causan sufrimiento, y para prevenirlos cuando esto sea posible (349–353) y que las razones para su indicación queden por escrito (350,353).

## **Sección 4. DELIRIUM**

### **A. Identificación, prevención y manejo del delirium.**

**¿Cuál es el beneficio a corto y largo plazo en el manejo adecuado del delirium en el adulto críticamente enfermo?**

**A1. Se recomienda el manejo adecuado del delirium ya que a corto plazo disminuye el tiempo de ventilación mecánica, trastornos cognitivos, estancia en UCI y hospitalaria; además a largo plazo se asocia con disminución en la mortalidad y mejor calidad de vida. Recomendación fuerte, nivel de evidencia alto.**

**A2. Se recomienda el uso de dexmedetomidina en infusión continua en pacientes con delirium hiperactivo en ventilación mecánica, ya que se asocia a mayor número de horas libre de ventilador en los primeros 7 días, extubaciones más tempranas y una resolución más rápida del delirium. Recomendación fuerte, nivel de evidencia moderado.**

#### **Justificación:**

Zhang y cols. en un meta-análisis de 2013 mostró una tasa de mortalidad más alta de pacientes en delirium que los pacientes no delirantes (OR: 3.22; IC del 95%: 2.30-4.52). Los pacientes delirantes tuvieron una mayor tasa de complicaciones, estancia más larga en la UCI y en el hospital, además pasaron más tiempo en la ventilación mecánica (358). Reade y cols.

en un estudio aleatorizado controlado multicéntrico en 15 UCIs de Australia y Nueva Zelanda, demostró que el uso de dexmedetomidina en infusión continua a dosis hasta de 1.5 mcg/kg/hora vs placebo se asoció a aumento de horas libres de ventilador al día 7 de la aleatorización, extubación temprana y más rápida resolución del delirium (135).

Chen y cols. en su meta-análisis mostró que la sedación a largo plazo con dexmedetomidina en adultos críticamente enfermos redujo la duración de la ventilación mecánica y la duración de la estancia en la UCI, pero no disminución en la mortalidad (145).

### **¿Cuál es el beneficio de usar estrategias de detección y manejo de delirium?**

**A3. Se recomienda la valoración diaria con una escala validada como CAM-ICU (the confusion assessment method for the intensive care unit) y ICDSC (intensive care delirium screening checklist) para la detección de delirium en pacientes críticamente enfermos con o sin ventilación mecánica, ya que esto se asocia a disminución de la mortalidad y estancia hospitalaria. Recomendación fuerte, nivel de evidencia moderado.**

**A4. Se recomienda intervenciones multicomponente (reducción de luz y ruido, cubrimiento de los ojos, orientación frecuente al paciente y provisión de música), en los pacientes críticamente enfermos con delirium para disminuir la duración en días e impactar en mejores desenlaces. Recomendación fuerte, nivel de evidencia moderado.**

### **Justificación:**

En las revisiones sistemáticas y meta-análisis de Gusmao y cols. (359), Van de Meeberg (360), Collinsworth (361), demostraron que la utilización del CAM-ICU (the confusion assessment method for the intensive care unit) y ICDSC (intensive care delirium screening checkliss) como estrategias válidas para la detección del delirium. Saber y cols. demostraron una sensibilidad del 80.0% (IC 95%: 77.1 -82.6%) y especificidad del 95.9% (95% IC: 94.8- 96.8%) para la detección de delirium por medio de la escala CAM-ICU. La sensibilidad y especificidad para el ICDSC fue de 74% (95% IC: 65.3- 81.5%) y 81.9% (95% IC: 76.7 -86.4%), respectivamente.

El meta-análisis de Van Vethuijsen y cols. mostró al CAM-ICU o ICDSC como herramientas de tamizaje para delirium en pacientes críticamente enfermos. Adicionalmente, debido a su alta especificidad, el CAM-ICU es también una excelente herramienta diagnóstica para el delirium. Esta información es relevante debido a que se debe usar rutinariamente una herramienta validada para monitorizar a los pacientes críticamente enfermos y en caso de diagnosticar delirium se debe realizar un algoritmo para establecer la causa y la estrategia terapéutica respectiva (362).

En el estudio de cohorte prospectivo de Luetz A y cols. encontraron asociación independiente entre adherencia al monitoreo del delirium y mortalidad hospitalaria en pacientes ventilados (363).

Luther en su revisión sistemática mostró que intervenciones multicomponente no farmacológicas (reducción de luz y ruido, cubrimiento de los ojos, orientación frecuente al paciente y provisión de música) generaban reducción del riesgo, incidencia y duración del delirium. Así mismo, de esta revisión, tres estudios demostraron reducción estadísticamente

significativa en la incidencia de delirium ( $p<0.003$ ,  $p<0.006$  y  $p<0.001$ ); dos estudios con disminución en la duración del delirium (364).

Las recomendaciones para la práctica incluyen incrementar el conocimiento del equipo multidisciplinario en delirium, a través de entrenamiento y educación y fomentando la revisión de medicamentos. Se necesitan más estudios sobre el potencial beneficio terapéutico de la melatonina y la terapia de luz, en el delirium. La melatonina puede ser una alternativa relevante a los sedantes-hipnóticos en adultos mayores y un incremento del contraste luz/oscuridad puede proveer beneficios terapéuticos reduciendo la susceptibilidad al delirium (364).

**¿Cuáles son las medidas farmacológicas y no farmacológicas más recomendadas para prevenir el delirium en el paciente crítico?**

**A5. Se recomienda realizar esfuerzos estructurales, organizacionales y de manejo médico para reducir la ansiedad, mejorar la adaptación, la comodidad del paciente, contribuir al adecuado control del dolor, la reorientación frecuente y la optimización del entorno con el fin de disminuir la aparición de delirium.** Recomendación fuerte, nivel de evidencia moderado.

**A6. Se recomienda intervención multimodal (reducción de luz y ruido, cubrimiento de los ojos, orientación frecuente al paciente y provisión de música) y la estrategia ABCDEF en pacientes críticamente enfermos.** Recomendación fuerte, nivel de evidencia moderado.

**A7. Se sugiere la integración de la familia con visitas no restringidas en la prevención del delirium dentro de las terapias no farmacológicas.** Recomendación condicional, nivel de evidencia bajo.

**A8. Se recomienda la utilización de dexmedetomidina en infusión continua a bajas dosis para prevención de delirium en POP de cirugía no cardíaca con alto riesgo de delirium.** Recomendación fuerte, nivel de evidencia alto.

**A9. Se recomienda en pacientes con ventilación no invasiva la administración de dexmedetomidina, para prevenir el delirium y disminuir la necesidad de intubación.** Recomendación fuerte, nivel de evidencia moderado.

**A10. Se sugiere el uso de haloperidol en la prevención de delirium en pacientes mayores de 75 años en posoperatorio de cirugía abdominal y ortopédica.** Recomendación condicional, nivel de evidencia moderado.

#### **Justificación:**

Luther en su revisión sistemática, mostró como intervenciones multicomponente no farmacológicas (MNI) tales como reducción de luz y ruido, cubrimiento de los ojos, orientación frecuente al paciente y provisión de música, mostraron el mayor valor cronoterapéutico en reducción de incidencia, riesgo y duración. Siendo la educación del equipo multidisciplinario un elemento clave, así como el manejo adecuado de la analgesia, la afectación iatrogénica del sueño, la comodidad del paciente, la reorientación terapéutica frecuente y optimización del entorno. En esta revisión, tres estudios mostraron reducción estadísticamente significativa en la incidencia de delirium con valores de  $p < 0.003$ ,  $p < 0.006$  y  $p < 0.001$ . Así mismo, dos estudios adicionales, mostraron disminución en la duración del delirium, el de Patel y cols. en el 2014 con un promedio de 3.4 días pre-intervención a 1.2 días post-intervención ( $p = 0.021$ ), y el de Guo y cols. en el 2015 que reportó un promedio de

28.1 h en el grupo MNI Vs 60.2 h en el grupo control ( $p<0.001$ ) (364,365).

Luther R y cols. Kluger C y cols. y Smithburger PL y cols. dan recomendaciones que incluyen incrementar el conocimiento del equipo multidisciplinario en delirium con una clara integración y capacitación a la familia para disminuir el delirium (366,367). El grupo de Su y cols. en un estudio aleatorizado, doble ciego, encontraron disminución en forma significativa en la aparición de delirium, en pacientes intervenidos con dexmedetomidina a dosis bajas, con respecto al grupo no intervenido, en pacientes en POP de cirugía no cardíaca. (118). El grupo de Abdelgalel EF y cols. en un estudio con pacientes en ventilación mecánica no invasiva, compararon tres grupos: el primero intervenido con dexmedetomidina a dosis de 0.2 a 0.7 mcg/k/min, el segundo con haloperidol a dosis de 0.5 mgr a 2 mgr/ hora y el tercero con solución salina como grupo placebo. Encontraron que la presencia de delirium fue menor en el paciente intervenido con dexmedetomidina. Así mismo, se encontró una mayor incidencia de intubación en los grupos con placebo y haloperidol (368).

Collet y cols. (369) en un estudio multicéntrico con 1260 pacientes, encontraron una ocurrencia de delirium del 25%, en los cuales los medicamentos más prescritos fueron el haloperidol en un 46% y dexmedetomidina en un 21%. Curiosamente, también recibieron benzodiacepinas un 36%. La presencia de delirium hiperactivo (OR 29.7 IC95% 12.9–74.5) y el soporte circulatorio (OR 2.6 IC 1.1–6.9), estuvieron asociadas con la administración subsecuente de haloperidol. El uso de haloperidol no se asoció, en este estudio, con aumento ni disminución de la mortalidad.

Fukata y cols. evaluaron el uso de haloperidol profiláctico en la prevención del delirium, en un estudio con 201 pacientes mayores de 75 años. Encontraron disminución de la incidencia de delirium (25% vs 18%) en pacientes en POP de cirugía abdominal y

ortopédica programada (370). Este efecto del haloperidol, no fue demostrado en un grupo de pacientes más jóvenes en alto riesgo de desarrollo de delirium (371).

**¿Cuáles son las medidas farmacológicas y no farmacológicas más recomendadas para el tratamiento del delirium en el paciente crítico?**

**A11. Se recomienda las estrategias ABCDEF y multimodales en el manejo de delirium en los pacientes críticamente enfermos.** Recomendación fuerte, nivel de evidencia moderado.

**A12. Se recomienda la dexmedetomidina para el manejo de pacientes con ventilación mecánica en delirium hiperactivo.** Recomendación fuerte, nivel de evidencia moderado.

**A13. Se sugiere la utilización de quetiapina en pacientes con delirium hipoactivo.** Recomendación condicional, nivel de evidencia bajo.

**A14. Se recomienda la utilización de dexmedetomidina en el paciente críticamente enfermo con delirium.** Recomendación fuerte, nivel de evidencia moderado.

#### **Justificación:**

Luther y cols. como se mencionó anteriormente, demostraron la importancia de las intervenciones multicomponentes no farmacológicas y estrategias ABCDEF (*Assessment, Prevention, and Management of Pain, Both Spontaneous Awakening Trials and Spontaneous Breathing Trials, Choice of Sedation and Analgesia, Delirium Assessment, Prevention, and Management, Early Mobility and Exercise, Family Communication and Involvement*) (372) (364).

Reade y cols. demostraron en un estudio de 74 pacientes, en los que se usó dexmedetomidina después del diagnóstico de delirium hiperactivo que disminuyó el tiempo



de ventilación mecánica en los primeros 7 días, y el tiempo en la resolución de delirium (135). Carrasco y cols. demostraron en un estudio de 132 pacientes en los cuales en 86 falló el manejo de delirium hiperactivo con haloperidol, que la dexmedetomidina es una alternativa efectiva para su manejo (373).

Michaud CJ y cols. realizaron un estudio observacional, comparativo con 113 pacientes, en los cuales 52 fueron intervenidos con quetiapina y 61 con medidas generales. EL grupo que recibió quetiapina, disminuyó en forma significativa los días del delirium hipoactivo (374).

## **B. Predicción del delirium**

**¿ Es posible predecir la aparición de delirium en el paciente crítico?**

**B1. Se recomienda el uso de los modelos E-PRE-DELIRIC y PRE-DELIRIC al ingreso y a las 24 horas de admisión respectivamente, para predecir el riesgo de aparición de delirium.** Recomendación fuerte, nivel de evidencia moderado.

**B2. Se recomienda el uso de las reglas de predicción NICE, el APREDEL-ICU, la herramienta AWOL y otros modelos basados en factores de riesgo, para predecir la aparición de delirium.** Recomendación fuerte, nivel de evidencia bajo.

### **Justificación:**

En la guía anterior (13) recomendamos el uso del PRE-DELIRIC (*PRE-diction of DELIRium in ICU patients*), un modelo predictivo multivariado, desarrollado y validado en

Países Bajos por Van den Boogaard cols (375) para predecir el riesgo de aparición de delirium en pacientes críticos, basado en diez factores de riesgo: edad, APACHE II, compromiso neurológico, tipo de paciente (quirúrgico, médico o traumatizado), infección, acidosis metabólica, uso de opioides, sedantes (benzodiazepinas o propofol), uremia y admisión urgente; con un AUROC (área bajo la curva ROC) de 0.87, superior a la de la valoración de los médicos y enfermeras, de 0.59. Posteriormente se realizó una recalibración del PRE-DELIRIC (376) en 8 hospitales de 6 países, de manera prospectiva en 1.824 pacientes, ajustando los 10 predictores y mejorando la predicción del riesgo, obteniendo un AUROC de 0.77.

Wassenaar cols. desarrollaron un modelo de predicción temprana con la información disponible en el momento de admisión (E-PRE-DELIRIC), realizando un estudio en 13 unidades de 7 países utilizando 9 predictores: edad, déficit cognitivo, consumo de alcohol, nitrógeno ureico, tipo de paciente, admisión de urgencia, presión arterial, uso de esteroides y falla respiratoria, con un AUROC de 0.76 (377). Estos modelos fueron comparados en otro estudio, aplicándolos de manera secuencial en dos pasos: al ingreso y a las 24 de admisión, encontrando un mejor desempeño del PRE-DELIRIC (AUROC 0.74 vs 0.68). Sin embargo, los intensivistas manifestaron preferir el E-PRE-DELIRIC por ser más factible de usar. También se encontró una mejoría en la sensibilidad en el grupo de bajo riesgo al hacer el cálculo de la probabilidad en dos pasos con ambos modelos (378). Éste mejor desempeño del PRE-DELIRIC también fue confirmado en una revisión sistemática (379).

Newman cols. (380) hacen una comparación de los modelos desarrollados como el de Inouye cols. (381) desde 1993 hasta el año 2013. La mayoría incluye como factores de

riesgo el déficit cognitivo previo, la edad, la severidad de la enfermedad y el deterioro de las actividades diarias. Douglas cols. desarrollaron y validaron la herramienta AWOL (*Age, World not, disOrientation and iLlness*) para predecir delirium en pacientes hospitalizados con edad mayor de 50 años, con un AUROC de 0.81 (382). Esta misma herramienta es utilizada por Brown y cols. en un estudio donde los pacientes con puntuación de cero, tuvieron una frecuencia de delirium de 5.5%, en contraste con los que alcanzaron 4 puntos, quienes tuvieron una frecuencia de 77.8%, con un AUROC de 0.83 (383).

En dos estudios, el primero en una UCI quirúrgica y el otro en una médica, se aplicó un sistema de predicción automática del delirium llamado APREDEL-ICU (*Automatic Prediction of Delirium in Intensive Care Units*), desarrollado en cohortes retrospectivas y luego validado prospectivamente, en donde una ventana emergente le informa a las enfermeras cuando hay un paciente con alto riesgo de delirium, haciendo que éstas inicien intervenciones más tempranas y apropiadas basadas en la evidencia para reducir el riesgo de delirium. Los factores de riesgo en los que se basa son: edad, medicamentos, nivel de conciencia, dependencia física, desequilibrio hídrico, presión arterial, glicemia, leucocitos, plaquetas, potasio, fósforo, magnesio, LDL y proteínas. El sistema, con una AUROC entre 0.81 y 0.93, consiguió mejorar entre las enfermeras el conocimiento sobre la prevención y manejo del delirium (384,385).

En el 2010, el Centro Nacional de Excelencia Clínica del Reino Unido (NICE) realizó una revisión sistemática y un meta análisis para factores de riesgo de delirium, identificando 6 factores de riesgo independientes: déficit cognitivo basal, discapacidad visual, gravedad de la enfermedad, fractura, infección y edad (2 puntos de corte) (386). Basándose en las reglas

NICE, que otorga una puntuación a cada uno de estos factores hasta sumar un máximo de 18 puntos, se han desarrollado y validado algoritmos de cálculo automático para predecir el riesgo de delirium: en el estudio de Rudolph cols. se analizó una cohorte retrospectiva de 27.625 pacientes y luego se hizo una validación prospectiva en 246 pacientes. En este estudio se utilizó el estadístico C para evaluar la capacidad de discriminación del algoritmo e-NICE para predecir la aparición de delirium, siendo éste de 0.81 en la fase retrospectiva y 0.69 en la prospectiva. El grupo de bajo riesgo, aquellos con  $\leq 2$  puntos, tuvo una incidencia de delirium de 14.9%, mientras que el de muy alto riesgo, con  $\geq 9$  puntos, tuvo una incidencia de 55%. (387). Halladay cols. en un estudio publicado en JAMA en el 2018 comparó un algoritmo NICE consolidado donde los factores de riesgo dominantes fueron el deterioro cognitivo, la infección, el nivel de sodio y la edad de 80 años o más, mostrando un AUROC de 0,91, mientras que el e-NICE obtuvo un AUROC de 0.81;  $p < 0.01$ . En el grupo de bajo riesgo, aquellos con  $\leq 2$  puntos, hubo una incidencia de delirium de 1.1%, mientras que en el de riesgo intermedio, entre 3-4 puntos, la incidencia fue de 27.7% y en el de alto riesgo, con 5-6 puntos, hubo una incidencia de 46.5%. (388).

Finalmente, en un estudio de 2017 realizado por Chen cols. desarrollaron y validaron un modelo de 11 factores: edad, APACHE-II, coma, cirugía de emergencia, ventilación mecánica, traumatismo múltiple, acidosis metabólica, antecedentes de hipertensión, delirium y demencia, y uso de dexmedetomidina. La ventilación y la historia de delirium previo fueron los más importantes factores de riesgo, con OR de 2.23 (IC 95% 1.23–4.05) y 3.6 (IC 95% 1.12–14.09), respectivamente, mientras que el uso temprano de dexmedetomidina se asoció con disminución en el riesgo con un OR de 0.57 (IC 95% 0.33–0.98). El modelo obtuvo un AUROC de 0.78 (389).

Actualmente existen páginas web que pueden ser consultadas y aplicaciones disponibles para iOS y Android que pueden ser utilizadas para hacer más fácil y rápido el cálculo de los puntajes basado en estos modelos. En el sitio web [evidencio.com](http://evidencio.com) están los modelos E-PRE-DELIRIC (<https://www.evidencio.com/models/show/981>) y PRE-DELIRIC (<https://www.evidencio.com/models/show/608>), donde introduciendo la información requerida en el modelo, éste arroja una probabilidad de desarrollar delirium.

El conocimiento previo de una mayor probabilidad de presentar delirium, debe hacer que se inicien intervenciones tempranas, basadas en la evidencia y centradas en el paciente, para disminuir el riesgo y evitar sus consecuencias, o al menos evitar aquellas intervenciones que empeoran el riesgo. A la fecha no hay estudios prospectivos que comparen un grupo donde se haga prevención basada en la predicción con otro grupo donde ésta no se haga, pero un estudio así tendría consideraciones éticas. Se requiere continuar los esfuerzos en reducir la incertidumbre con respecto a factores de riesgo, para mejorar los desenlaces del paciente crítico.

### **C. Déficit cognitivo persistente.**

**¿Cuáles son los factores de riesgo asociados con déficit cognitivo persistente?**

**C1. Se recomienda realizar una valoración de los factores de riesgo asociados a la aparición de déficit cognitivo persistente en los pacientes admitidos a la UCI.**

**Los principales factores de riesgo asociados a déficit cognitivo persistente son la presencia de delirium en la UCI y síntomas de estrés post-traumático durante los primeros 30 días del egreso.** Recomendación fuerte, nivel de evidencia bajo.

**Justificación:**

El deterioro cognitivo posterior a hospitalización en cuidado intensivo es un problema frecuente con incidencias reportadas ente un 4% y 66% en diversos estudios, con un deterioro en la calidad de vida del paciente que egresa de UCI, con un costo elevado para el sistema. En una revisión sistemática, publicada en 2018, analizando los factores de riesgo modificables, incluyendo 28 estudios, con distintas formas de evaluación del deterioro cognitivo, se encontró que el delirium es el principal factor de riesgo para presentar déficit cognitivo persistente. Respecto a la ventilación mecánica los hallazgos eran inconsistentes entre los distintos estudios. Solo 2 de 14 estudios analizados encontraron una asociación entre la ventilación mecánica y el desarrollo de deterioro cognitivo, y 12 de ellos no encontraron ninguna asociación. No se encontraron asociaciones entre el uso de analgésicos opioides o sedantes ni el uso de otros medicamentos como vasopresores, antipsicóticos o antidepresivos y el desarrollo del deterioro cognitivo (390).

Un estudio pequeño retrospectivo, de pacientes con SDRA, encontró una mayor tendencia a desarrollar un deterioro cognitivo en pacientes con glicemia mayores de 153 mg/dl (391). Al analizar el desarrollo de estrés agudo intrahospitalario, por medio de la lista de chequeo de estrés postraumático, se encontró que la presencia de síntomas de estrés agudo intrahospitalario era un factor de riesgo independiente para deterioro cognitivo persistente ( $p=0.03$ ) (392).

En una cohorte prospectiva multicéntrica, incluyendo 821 pacientes en UCI, se encontró una prevalencia del 6% de pacientes con alteraciones cognitivas en el momento de ingresar a la UCI. 74% desarrolló delirium durante su hospitalización. A los 3 meses un 40% tenía un desempeño 1.5 desviaciones estándar por debajo de la población general, utilizando la escala RBANS (Repeatable Battery for the Assessment of Neuropsychological Status) y un 26% estaba 2 desviaciones estándar por debajo de lo esperado. Una mayor duración del delirium se asociaba con una peor condición global de cognición a los 3 y 12 meses ( $p=0.001$  y  $p=0.04$ ), y peores funciones ejecutivas a 3 y 12 meses ( $p=0.004$  y  $p=0.007$ ), respectivamente. El uso de medicamentos sedantes o analgésicos no se asoció consistentemente con alteraciones en el desempeño (393).

Otro estudio de cohorte prospectivo analizando el fenotipo del delirium, encontró que el más común está asociado al uso de sedantes (63% días de delirium) y una mayor duración del delirium asociado a sedantes predijo una peor puntuación de cognición global de RBANS a los 12 meses, después de ajustar por co-variables (diferencia en la puntuación que compara 3 días vs 0 días: -4.03, IC 95% -7.80 a -0.26). De manera similar, las duraciones más prolongadas del delirium hipóxico (-3.76, IC del 95%: -7.16 a -0.37), el delirium séptico (-3.67, -7.13 a -0.22) y el delirium sin clasificar (-4.70, -7.16 a -2.25) también predijeron peor función cognitiva a los 12 meses, mientras que la duración del delirium metabólico no (1.14, -0.12 a 3.01) (394).

En un estudio de cohorte en 33 pacientes, enfocado en analizar los cambios cognitivos en pacientes con sepsis tanto a corto como largo plazo, a las 24 horas y al año del egreso de UCI, se encontró que los puntajes IQCODE (estado cognitivo previo), puntaje de APACHE II, niveles de IFN- $\gamma$  a la salida de UCI se asoció con un mal desempeño cognitivo, mientras

que un nivel educativo alto se asoció a un mejor desempeño. En menor grado, la dosis al primer antibiótico, dosis acumulada de haloperidol, y niveles medios de glicemia se asociaron a un menor desempeño. La mayoría de estos cambios mejoró en la evaluación al año (395).

En otro estudio se encontró que en pacientes sépticos, que desarrollaban delirium y síndrome de estrés postraumático tenían un menor desempeño en la función cognitiva (396).

### **¿Cuáles son las Estrategias para la prevención del déficit cognitivo persistente?**

**C2. Se recomienda la prevención y manejo del delirium como principal estrategia para disminuir la incidencia del déficit cognitivo persistente.** Recomendación fuerte, nivel de evidencia bajo.

**C3. Se Sugiere promover movilización temprana, disminución de sedantes, optimización del sueño y un adecuado soporte emocional y psicológico como estrategias asociadas a la disminución del déficit cognitivo persistente.** Recomendación condicional, nivel de evidencia bajo.

### **Justificación:**

Las intervenciones tempranas durante la estancia en UCI pueden tener impacto en la morbilidad psicológica y cognitiva de los pacientes. Estas medidas incluyen la movilización temprana, disminución de sedantes, estrategias para mejorar el sueño y proveer soporte emocional y psicológico (397).

La movilización temprana tiene efectos neuroprotectores al mejorar la transmisión sináptica, mejorar la función cognitiva y disminuir la depresión y la ansiedad. Estudios en donde se inicia rehabilitación con la bicicleta al lado de la cama del paciente en el día 5 de



UCI, mejoran su capacidad funcional al ejercicio y fuerza muscular (398). Algunos protocolos han propuesto iniciar terapia física y terapia ocupacional en los periodos de suspensión diaria de sedación, con mejores resultados funcionales al egreso hospitalario, menor incidencia de delirium y menos días de ventilación mecánica (399). Un estudio aleatorizado comparando pacientes con cuidado usual, terapia física precoz o terapia física más cognitiva en UCI no demostró una diferencia en la función cognitiva a los 3 meses (400).

El uso de protocolos de manejo que incluyan el uso racional de la sedación disminuyen la incidencia de delirium en la UCI (45). Intervenciones no farmacológicas como reducción del ruido y preservación del sueño se han aconsejado, pero no hay estudios fuertes que respalden su eficacia (401).

## **Sección 5. POBLACIONES ESPECIALES**

### **D. Pacientes con insuficiencia renal o hepática.**

**¿Qué medicamentos analgésicos y sedantes están indicados y contraindicados en pacientes con insuficiencia hepática?**

**D1. Se sugiere el uso de analgesia multimodal para el tratamiento del dolor postoperatorio en pacientes adultos con disfunción hepática o renal. *Recomendación condicional, nivel de evidencia bajo.***

#### **Justificación**

La administración de medicamentos analgésicos y sedantes en pacientes en cuidado intensivo con disfunción hepática y/o renal son desafiantes para los clínicos que manejan

dichos pacientes, haciéndose imperativo una monitoría cuidadosa para minimizar los potenciales eventos adversos, así que la farmacocinética y la farmacodinamia de estas sustancias deben ser entendidas para poder iniciar el manejo racional de la analgesia y la sedación de estos. (1) Los pacientes en la UCI pueden mostrar una amplia gama de disfunciones de órganos. La disfunción hepática se puede presentar en un número importante de pacientes críticos, que, sumado a la presencia de insuficiencia renal aguda, tienen una incidencia entre 7% y 23%. Alteraciones en la función hepática y renal puede alterar significativamente la farmacocinética (PK) y la farmacodinamia (PD) de las drogas, que pueden dar lugar a resultados adversos. (2)

Desafortunadamente no existen suficientes estudios, pues la mayoría de las recomendaciones se basan en reporte de casos, análisis retrospectivos y opiniones de expertos. Por lo que la escogencia de los fármacos y la titulación progresiva y cuidadosa de estos, es absolutamente necesaria mientras se producen documentos científicos de alta calidad. La denominada Analgesia multimodal, es definida como el uso de distintas variedades de medicaciones analgésicas( opioides, antiinflamatorios, inhibidores de NMDA ,anestésicos locales, bloqueos regionales etc.) , intervenciones que poseen diferentes mecanismos de acción en el sistema nervioso central y periférico (que también podría combinarse con intervenciones no farmacológicas) tienen un efecto aditivo o efecto sinérgico con un mejor alivio del dolor y menos efectos secundarios en comparación con intervenciones de modalidad única. (402)

**D2. No se sugiere el uso de AINES en pacientes con disfunción hepática.** *Recomendación condicional, nivel de evidencia bajo.*

## **Justificación:**

No existen guías basadas en la evidencia sobre el uso de analgésicos en pacientes con enfermedad hepática y cirrosis. Como resultado, el manejo del dolor en estos pacientes genera un malentendido considerable entre los profesionales de la salud, lo que lleva a un tratamiento insuficiente del dolor en esta población. Los AINES se metabolizan en gran medida por las enzimas CYP y la mayoría están altamente unidas a proteínas en el plasma (típicamente > 95%), de manera general a la albúmina. Por lo tanto, el metabolismo alterado y la biodisponibilidad de los AINES, que dan lugar a su nivel elevado en suero pueden tener efectos tóxicos y secundarios relevantes. Un importante mecanismo de efectos adversos inducidos por los AINES en pacientes con etapas avanzadas de cirrosis es la inhibición de la producción de prostaglandinas. El paciente cirrótico presenta frecuentemente insuficiencia cardíaca de alto gasto, con resistencia periférica disminuida, con activación del sistema renina-angiotensina-aldosterona, el sistema nervioso simpático y la liberación no osmótica de la hormona antidiurética (403,404)

Existen sistemas de puntuación del grado de enfermedad hepática que incluyen, Child's Score con Pugh's Modificado y el MELD score. Aunque estos sistemas de puntaje son útiles al evaluar la gravedad de la hepatopatía y predecir la mortalidad, no han sido validados como predictores en la respuesta de medicamentos utilizados. Aunque es razonable pensar que entre más grave el daño mayor la sensibilidad con el uso de sedantes y analgésicos, no por ello contraindicados absolutamente en el manejo del dolor agudo o crónico (403). Muchos de los pacientes cirróticos tienen disfunción renal asociada, gastritis, varices esofágicas con alto riesgo de sangrado así que la administración de AINES debe ser altamente restringida (405)

**D3. Se sugiere el uso de acetaminofén en el primer escalón para manejo de dolor agudo en pacientes cirróticos no alcohólicos en dosis 2-3 g/día. Recomendación condicional, nivel de evidencia bajo.**

**Justificación:**

En el año 2006, la *American Liver Foundation* (ALF) emitió recomendaciones para que las personas no excedan los 3 g/día de acetaminofén por un período prolongado de tiempo. Sobre la base de los datos de diferentes estudios y con las nuevas directrices de la FDA en mente, la recomendación actual para el uso a largo plazo de acetaminofén (> 14 días) en pacientes cirróticos (que no beben alcohol activamente) es una dosis reducida de 2 a 3 gr /24 horas.

Debido a su perfil de seguridad probado (cuando se administra en las dosis recomendadas) y la falta de efectos sedantes y la ausencia de nefrotoxicidad, el acetaminofén puede ser utilizado en pacientes con enfermedad hepática, no alcohólica incluida la cirrosis. (403–405)

**D4. Se sugiere evitar el uso de dipirona en pacientes cirróticos. Recomendación condicional, nivel de evidencia bajo.**

**Justificación:**

Por tener propiedades inductoras enzimáticas hepáticas e inhibición de las prostaglandinas, los vasodilatadores renales no se recomiendan. La dipirona es un analgésico, antipirético, espasmolítico y antiinflamatorio de amplio uso en Latinoamérica, proscrito por agencias regulatorias de referencia, por el riesgo de agranulocitosis y otras discrasias sanguíneas. La literatura reporta que la dipirona es eficaz como antipirético y para el manejo

del dolor agudo, crónico, posoperatorio, cólico renal y migraña. La prevalencia de agranulocitosis es de 0.03 al 0.5% en pacientes europeos y la incidencia de pacientes hispanos está alrededor de 0.38 casos por un millón de habitantes/año y aún menor en anemia aplásica. Algunos estudios proponen que la 4-metilaminoantipirina, su principal metabolito activo, inhibe ambas isoformas la ciclooxigenasa COX-1 y COX-2. (406).

En un estudio prospectivo aleatorizado con pacientes cirróticos de Zapater y cols en el 2015, la administración de dipirona demostró disminución de la concentración sérica y renal de PG-KetoPGF1 y PGE2 lo que puede comprometer el flujo renal en los pacientes con disfunción hepática (406)

**D5. Se sugiere el uso de tramadol a dosis de 25 mg cada 8 horas como segunda línea de tratamiento después del acetaminofén. Recomendación condicional, nivel de evidencia bajo.**

#### **Justificación:**

El tramadol es un analgésico sintético de acción central estructuralmente relacionado con la codeína y la morfina. Se convierte tanto por CYP3A4 como por CYP2D6 en O-desmetiltramadol, que también se metaboliza por CYP2D6; por lo tanto, en pacientes cirróticos con actividad enzimática disminuida, sus propiedades analgésicas pueden no estar completamente establecidas. No debe usarse concomitantemente con otros opioides. Se debe tener precaución al administrar tramadol a pacientes epilépticos porque puede reducir el umbral convulsivo. Tampoco, se debe combinar con otros medicamentos opioides como la morfina, los inhibidores selectivos de la recaptación de serotonina, los antidepresivos tricíclicos, porque puede precipitar el síndrome serotoninérgico.(405).

**¿Qué medicamentos analgésicos y sedantes están indicados y contraindicados en pacientes con insuficiencia Renal?**

**D6. Se sugiere el uso de Fentanil y la metadona como medicamentos seguros en pacientes con insuficiencia renal. Recomendación condicional, nivel de evidencia bajo.**

**D7. Se sugiere utilizar con precaución la Hidromorfona y Oxicodona reduciendo la dosis en pacientes con insuficiencia renal. Recomendación condicional, nivel de evidencia bajo.**

**D8. Se sugiere evitar el uso de codeína, hidrocodona, meperidina y morfina en pacientes con insuficiencia renal. Recomendación condicional, nivel de evidencia bajo.**

**Justificación:**

El fentanil y la metadona no tienen metabolitos activos y no son removidos por la diálisis. La hidromorfona y la oxicodona tienen metabolismo hepático y sus metabolitos activos son removidos por la diálisis. La codeína se metaboliza a morfina. Los metabolitos activos se acumulan y pueden inducir depresión de SNC e hipotensión. La hidrocodona tiene metabolitos activos que se acumulan, no hay datos de seguridad. La meperidina tiene metabolitos activos, la normeperidina se acumula y puede producir convulsiones. Los metabolitos activos se acumulan produciendo depresión respiratoria y convulsiones (407).

**D9. Se sugiere el uso de acetaminofén aumentando el intervalo de medicación a cada 8 horas, con dosis no mayores a un gramo cuando la tasa de filtración glomerular (TFG) es menor a 10 ml por minuto. Recomendación condicional, nivel de evidencia bajo.**

### **Justificación:**

El acetaminofén tiene propiedades analgésicas y antipiréticas. Se desconoce el mecanismo exacto de la acción del acetaminofén, aunque se sabe que actúa a nivel central. Se cree que aumenta el umbral al dolor, inhibiendo las ciclooxigenasas en el SNC, enzimas que participan en la síntesis de las prostaglandinas. Sin embargo, el acetaminofén no inhibe las ciclooxigenasas en los tejidos periféricos, por lo que carece de actividad antiinflamatoria. También parece inhibir la síntesis y/o los efectos de varios mediadores químicos que sensibilizan los receptores del dolor a los estímulos mecánicos o químicos.

Los efectos antipiréticos bloquean el pirógeno endógeno en el centro hipotalámico regulador de la temperatura, inhibiendo la síntesis de las prostaglandinas (407,408). En presencia de insuficiencia renal, los medicamentos que presentan el perfil farmacológico más seguro son: alfentanilo, buprenorfina, fentanilo, ketamina, paracetamol (excepto con analgésicos compuestos), remifentanilo y sufentanilo. Ninguno de estos libera una carga metabólica activa alta, ni sufre de un aclaramiento significativamente prolongado. El acetaminofén se puede utilizar a dosis de (409) :

- Si  $FG < 50$  ml/min: 500-650 mg/6 h.
- Si  $FG < 10$  ml/min: 500-650 mg/8 h.

**D10. Se sugiere la administración de tramadol para el manejo de dolor en dosis de 100 mg cada 12 h en pacientes con TFG estimada de 30 ml/min y a 50 mg cada 12 h cuando la TFG estimada sea menor a 10 ml/min. Recomendación condicional, nivel de evidencia bajo.**

### **Justificación:**

Tramadol es un analgésico opioide que también inhibe los receptores de serotonina y la recaptación de noradrenalina. Es extensamente metabolizado por el hígado; el 30% del fármaco original y el 60% de sus metabolitos activos son eliminados por la orina. También es eliminado considerablemente por la diálisis, y por lo tanto, debería ser administrado después de la hemodiálisis. (407,408)

Su dosis máxima prescrita a los pacientes con enfermedad renal crónica avanzada se sugiere que no exceda 100 mg por vía oral dos veces al día y 50 mg dos veces al día para pacientes en diálisis. El aumento de los niveles en sangre del compuesto puede inducir depresión respiratoria y reducir el umbral convulsivo. El tramadol tiene el potencial de inducir un síndrome serotoninérgico. (405).

**D11. Se sugiere evitar el uso de AINES en pacientes con insuficiencia renal.**

*Recomendación condicional, nivel de evidencia bajo.*

**Justificación:**

El tipo de toxicidad renal inducida por AINES más frecuente es aquella causada por efecto hemodinámico.

Los AINES tienen efectos nefrotóxicos directos, incluyendo vasoconstricción de la arteriola aferente, lo cual produce reducción de la filtración glomerular. Así mismo, pueden causar nefritis, síndromes nefróticos que comúnmente incluyen mínimos cambio de enfermedad, glomérulo-nefropatía membranosa, retención de agua y sodio, empeorando la hipertensión preexistente, reacciones alérgicas (que conducen a lesión túbulo-intersticial),



necrosis papilar y diversas alteraciones electrolíticas, incluyendo hiponatremia, hipercalcemia y acidosis tubular renal tipo IV (407,408,410).

## **E. Analgesia del paciente en posoperatorio de trasplante cardiaco, pulmonar, hepático y renal.**

**¿Cuáles son los medicamentos recomendados para la analgesia postoperatoria en pacientes trasplantados de pulmón, hígado o riñón?**

### **Trasplante de pulmón:**

**E1. Se sugiere el uso de analgesia en el postoperatorio de trasplante pulmonar con bloqueo paravertebral o con analgesia epidural torácica continua. Recomendación condicional, nivel de evidencia bajo.**

### **Justificación:**

Existen pocos datos sobre las estrategias terapéuticas óptimas postoperatorias después del trasplante de pulmón (LTx). Los patrones de práctica actuales se basan en la opinión de expertos y la experiencia institucional, que resulta en cuidados postoperatorios no uniformes. (411) Los patrones de práctica en la atención postoperatoria temprana de los receptores de trasplante de pulmón, difieren considerablemente entre los centros. Muchas de las prácticas informadas no se ajustan a las pautas de consenso sobre el manejo de pacientes críticamente enfermos (411). En un estudio realizado en EEUU (412), para definir mejor los patrones de práctica, se realizó una encuesta que mostró:

- opiáceos + propofol (57.2%)
- opiáceos + dexmedetomidina (18.4%),
- opiáceos + benzodiazepinas continuas (8.2%)

- opiáceos solos (2%)

Aproximadamente el 40.4% informó que no se siguió una escala de sedación formal y que el 13.5% de los programas no tenían una política formal sobre sedación y analgesia. Estos hallazgos confirman la necesidad de realizar estudios con evidencia suficiente para recomendar técnicas analgésicas específicas, considerando que muchos de estos pacientes puedan estar coagulopáticos en el post operatorio inmediato (sangrado, uso de ECMO, etc.) (412).

Se han descrito varias formas de analgesia multimodal, acetaminofén, AINES, opioides, analgesia epidural torácica y recientemente catéteres paravertebrales colocados intra-operatoriamente o en cuidado intensivo bajo guía ecográfica (12). Cason M y cols. en un estudio retrospectivo publicado en 2013 estudiaron 123 pacientes a quienes en el postoperatorio de trasplante pulmonar le fueron colocados analgesia epidural torácica (AET). Mostró que ocho (6.7%) de los pacientes experimentaron compromiso pulmonar postoperatorio (p. Ej., Neumonía, intubación prolongada), no se asociaron complicaciones graves con la colocación de AET, la escala visual análoga para manejo de dolor en promedio fue 2.5, el tiempo promedio de ventilación mecánica fue de 1.2 días y estancia en UCI de 1.2 días. Los autores concluyen que esta forma de analgesia es una buena alternativa analgésica en postoperatorio de trasplante pulmonar (413). Hutchins J, Apostolidou I, Shumway S, y cols. en estudio prospectivo observacional publicado en 2017 en 35 pacientes trasplantados de pulmón, utilizaron analgesia con bloqueo paravertebral, guiado con ultrasonido, aplicados 1 a 2 días después del trasplante con ropivacaina 0.2%, lograron un adecuado control del dolor, sin reporte de eventos adversos. (414)

**E2. Se sugiere tener precaución al usar dexmedetomidina, como sedante en pacientes en postoperatorio de trasplante pulmonar, por el riesgo de asistolia. Recomendación condicional, nivel de evidencia bajo.**

**Justificación:**

En raras ocasiones, el trasplante ortotópico de pulmón se ha asociado con la alteración de la inervación autónoma del corazón. La combinación de esta alteración autonómica y dexmedetomidina puede estar asociada con bradicardia grave y/o asistolia. Debido a que los pacientes con trasplante ortotópico de pulmón, con denervación parasimpática, no responderán con una mayor frecuencia cardíaca a la terapia anticolinérgica, las bradiarritmias deben ser reconocidas y tratadas de inmediato con beta agonistas de acción directa (Ej. Fenilefrina, Noradrenalina, Adrenalina) para evitar la presentación de asistolia (415).

## **TRASPLANTE HEPATICO**

**E3. Se sugiere el control y administración intraoperatorio de magnesio cuando se use tramadol como analgésico postoperatorio. Recomendación condicional, nivel de evidencia bajo.**

**Justificación:**

Se observó que en pacientes mayores de 18 años en quienes se les suministró sulfato de magnesio intraoperatorio, los requerimientos de tramadol para analgesia y el tiempo de ventilación, se veían significativamente disminuidos en relación con el grupo control en el que no se administró sulfato de magnesio. Adicionalmente el tiempo que transcurrió hasta la

primera necesidad de tramadol fue mayor, demostrando así la efectividad en su uso como agente adyuvante en el intraoperatorio (416).

**E4. Se sugiere el uso de STAP (Subcostal transversus abdominis plane block), guiado por ultrasonido, en el manejo del dolor postoperatorio de trasplante hepático.**

*Recomendación condicional, nivel de evidencia bajo.*

#### **Justificación:**

Basado en varios artículos publicados en las últimas dos décadas, se cree que el dolor después del trasplante de hígado (LT) es menos intenso que el dolor después de otros procedimientos abdominales mayores, y que el consumo de opioides post operatorio es menor que en otros procedimientos hepatobiliares. También se cree que la analgesia opioide controlada por el paciente es el único modo de analgesia posoperatoria para este grupo de pacientes. (417)

Milan ZB y cols. demostraron que el bloqueo del plano transversal del abdomen bilateral (TAP por sus siglas en inglés) con leovobupivacaína (0.5%; 20 ml) guiado por ultrasonido, en trasplante ortotópico de hígado, contribuye a una disminución significativa de los requerimientos de morfina postoperatorio. Así mismo, disminuyó el tiempo hasta la extubación y el puntaje de la escala de dolor en los pacientes.(418)

#### **Trasplante renal.**

**E5. Se sugiere evitar el uso de AINES en el postoperatorio de trasplante renal.**

*Recomendación condicional, nivel de evidencia bajo.*

### **Justificación:**

Por las razones expuestas en pacientes con disfunción renal es razonable no utilizar antiinflamatorios no esteroideos en el postoperatorio de trasplante renal. Además, el uso concomitante con ciclosporina, como inmunosupresor, potencialmente aumenta la nefrotoxicidad de ambos. (407,410,419)

**E6. Se sugiere el uso de acetaminofén en el primer escalón de manejo de dolor post-trasplante renal. Recomendación condicional, nivel de evidencia bajo.**

### **Justificación:**

En general los pacientes trasplantados de riñón que no presentan disfunción del injerto, recuperan en pocas horas su capacidad metabólica, lo que facilitaría la administración de medicamentos dada la adecuada función renal.(419)

**E7. Se sugiere no utilizar el bloqueo de un plano transversal del abdomen (TAP) para el manejo de dolor post trasplante renal, pues no afecta el uso de morfina postoperatorio. Recomendación condicional, nivel de evidencia bajo.**

### **Justificación:**

Gulyam Kuruba SM y cols. evaluaron en un estudio controlado aleatorizado, la eficacia de TAP para reducir los requerimientos de morfina en las primeras 24 h posteriores a la cirugía de trasplante renal. Se realizaron inyecciones bajo guía ecográfica en 2 grupos de pacientes, con 20 ml de levobupivacaína al 0.5% (n = 27) o 20 ml de solución salina al 0.9% (n =27). Todos los pacientes recibieron acetaminofén regularmente y analgesia controlada

por el paciente en el postoperatorio. No se encontraron cambios significativos en los dos grupos, concluyendo que el uso de TAP no tiene ningún beneficio postoperatorio (420)

**E8. Se sugiere el uso de tramadol en paciente posoperatorio de trasplante renal.**

*Recomendación condicional, nivel de evidencia bajo.*

**Justificación:**

Como se mencionó anteriormente el tramadol tiene el potencial de inducir un síndrome serotoninérgico. (405). Si aplicamos las recomendaciones generales sobre el uso de opiáceos en pacientes sometidos a hemodiálisis, para el manejo postoperatorio inmediato de trasplante renal, estarían contraindicadas o no recomendadas, la codeína, la meperidina, dihidrocodeína, hidrocodona y la oxicodona. Puede utilizarse con precaución fentanil o hidromorfona y metadona ajustando las dosis según respuesta clínica. (419)

**E9. Se sugiere el uso de hidromorfona en el postoperatorio inmediato de trasplante renal.** *Recomendación condicional, nivel de evidencia bajo.*

**Justificación:**

En el post operatorio inmediato del trasplante de riñón, el manejo del dolor se consigue mejor con **analgesia multimodal**, mediante analgesia controlada por el paciente (PCA) durante las primeras 24-48 h, debido a que se ha demostrado reducción en las complicaciones relacionadas con los opiáceos. La hidromorfona puede ser el opiáceo de elección. La sustitución de un grupo ceto por uno grupo hidroxilo en la posición seis del anillo de benzol permite la distribución más rápida al SNC, lo que favorece un ajuste de dosis precozmente, cuando se compara con la morfina (410,421).

## Sección 6. VARIOS

Por la heterogeneidad se agrega la sección varios a la guía de manejo, donde se encuentran las recomendaciones en pacientes traumatizados, embarazadas, quemados, ancianos y pacientes con síndrome de abstinencia por alcohol y otras sustancias.

Estas fueron separadas dado que las recomendaciones y la literatura actual no han cambiado en los últimos años, pero es de suma importancia el conocimiento sobre estos temas y dar herramientas de manejo en dichas poblaciones.

### A. Pacientes traumatizados, embarazadas, quemados y ancianos.

**¿Qué consideraciones especiales y cuáles son las recomendaciones farmacológicas para el manejo de la sedación y analgesia en pacientes con situaciones especiales (traumatizados, ancianos, quemados y embarazadas)?**

| Población | Recomendaciones nuevas y antiguas                                                                                                                                            | Recomendación | Nivel de evidencia |
|-----------|------------------------------------------------------------------------------------------------------------------------------------------------------------------------------|---------------|--------------------|
|           | A1. Se sugiere que la dexmedetomidina puede ser una alternativa al haloperidol en el manejo de delirium en pacientes traumatizados sin trauma craneo encefálico (TCE) (422). | Condicional   | Moderado           |

|                      |                                                                                                                                                                                                                                         |             |          |
|----------------------|-----------------------------------------------------------------------------------------------------------------------------------------------------------------------------------------------------------------------------------------|-------------|----------|
| <b>Traumatizados</b> | A2. Pacientes sin lesión cerebral aguda: se recomienda el uso de ketamina como analgésico adicional en pacientes con trauma de tórax y fracturas costales en quienes no se logre control de dolor con PCA ni técnicas regionales (423). | Condicional | Moderado |
|                      | A3. Se recomienda la monitoría con BIS en el manejo de pacientes con trauma múltiple (424).                                                                                                                                             | Fuerte      | Moderado |
|                      | A4. Se sugiere el inicio de metadona en los primeros 4 días de inicio de la ventilación mecánica para reducir los tiempos de ventilación en pacientes que posiblemente estén ventilados por lo menos una semana (422).                  | Condicional | Bajo     |
| <b>Ancianos</b>      | A5. Se recomienda el uso de dexmedetomidina para la prevención de delirium en ancianos después de cirugía no cardíaca (118).                                                                                                            | Fuerte      | Alto     |
|                      | A6. Se recomienda el uso de dexmedetomidina como sedación en el manejo perioperatorio de cirugía cardíaca                                                                                                                               | Fuerte      | Moderado |



|                    |                                                                                                                                                                                                                                                                                                                          |             |      |
|--------------------|--------------------------------------------------------------------------------------------------------------------------------------------------------------------------------------------------------------------------------------------------------------------------------------------------------------------------|-------------|------|
|                    | en pacientes mayores de 60 años para<br>prevención de delirium. (425)                                                                                                                                                                                                                                                    |             |      |
| <b>Embarazadas</b> | A7. Se recomienda el uso de dexmedetomidina como agente sedante de elección en pacientes eclámpicas post parto que requieran ventilación mecánica, esto en relación a disminución de la presión arterial, frecuencia cardiaca, disminución de la necesidad de antihipertensivos, opiáceos y menor estancia en UCI. (131) | Fuerte      | Bajo |
| <b>Quemados</b>    | A8. Se recomienda el uso de la dexmedetomidina como coadyuvante para la sedación en pacientes quemados ventilados. (426).                                                                                                                                                                                                | Condicional | Bajo |

## B. Síndrome de abstinencia por alcohol y otras sustancias

**¿Cuáles son las medidas farmacológicas actuales recomendadas para el manejo del síndrome de abstinencia por alcohol y por otras sustancias diferentes al alcohol en el paciente adulto?**

**Síndrome de Abstinencia por alcohol.** Grado de Recomendación Condicional Moderado

| Sintomatología                                                                                                                                                                             | Medidas Farmacológicas                                                                                                                                                                                                                                                                                                                                                                                                                                                                                                                                                                                                                                                                                                                                                                                                                                                                                                                                                                                                                                                                                                                                                                                                                                                                        | Observaciones                                                                                                                                                                                                                                                                                                                                                                                                                                                                                                      |
|--------------------------------------------------------------------------------------------------------------------------------------------------------------------------------------------|-----------------------------------------------------------------------------------------------------------------------------------------------------------------------------------------------------------------------------------------------------------------------------------------------------------------------------------------------------------------------------------------------------------------------------------------------------------------------------------------------------------------------------------------------------------------------------------------------------------------------------------------------------------------------------------------------------------------------------------------------------------------------------------------------------------------------------------------------------------------------------------------------------------------------------------------------------------------------------------------------------------------------------------------------------------------------------------------------------------------------------------------------------------------------------------------------------------------------------------------------------------------------------------------------|--------------------------------------------------------------------------------------------------------------------------------------------------------------------------------------------------------------------------------------------------------------------------------------------------------------------------------------------------------------------------------------------------------------------------------------------------------------------------------------------------------------------|
| <p><b>• 6-24 h:</b></p> <p>Actividad autónoma, ansiedad, palpitaciones, Insomnio, agitación, taquipnea, cefalea, sudoración, anorexia / náuseas, y vómitos.</p>                            | <p><b>Primera línea:</b></p> <p><i>Benzodiacepinas (BZN)</i></p> <p><b>Lorazepam:</b> 4.8- 6.5 mg (moderado), 10.4 mg (severo)</p> <p>Ó <u>Clonazepam</u>: 4mg/ día, duración promedio 4 días (Vía oral)</p> <p>****<u>Diazepam</u> (sedación Profunda): 10 mg reevaluando cada 15 min para obtener un RASS 0, -2, una vez en meta evaluar cada 4 horas. (427,428)</p> <p><b>Medicamentos Coadyuvantes:</b></p> <ul style="list-style-type: none"><li>• <i>Dexmedetomidina</i></li></ul> <p>Disminución en el uso de BZD. Precaución con la hipotensión y bradicardia. No debe utilizarse como alternativa a BZD. Como co-adyuvante redujo los puntajes del CIWA (429)</p> <ul style="list-style-type: none"><li>• <i>Gabapentina:</i></li></ul> <p>Disminuye la ansiedad, los requerimientos de sedación y el insomnio relacionados con el síndrome de abstinencia. No se metaboliza en el hígado, tiene un bajo potencial de abuso y tiene una baja letalidad en casos de sobredosis.</p> <p>Dosis: 900mg/d a 1800 mg/d (430)</p> <ul style="list-style-type: none"><li>• <i>Barbituricos</i></li></ul> <p>Como coadyuvantes en caso de altas dosis de BZDs y DT. Hay que tener precauciones en la sobredosificación y la depresión respiratoria. Útil en pacientes con AWS refractario</p> | <p>La severidad de la abstinencia puede calcularse utilizando instrumentos como:</p> <ul style="list-style-type: none"><li>○ Evaluación de Retiro del Instituto Clínico para la Escala de Alcohol, Revisada (CIWA-Ar)</li><li>○ Cuestionario CAGE (431)</li></ul> <p><u>BZD:</u></p> <p>Se recomienda el programa graduado por síntomas según la puntuación de la escala de evaluación de AWS.</p> <p>Existe el programa fijo (Infusión continua), sin embargo este se asocia a mayor riesgo de neumonía, VM y</p> |
| <p><b>7-48 h:</b></p> <p>Convulsiones tónico-clónicas (10% de los pacientes). Alucinaciones visuales, táctiles o auditivas (30% de los pacientes). Inestabilidad autonómica (diarrea).</p> |                                                                                                                                                                                                                                                                                                                                                                                                                                                                                                                                                                                                                                                                                                                                                                                                                                                                                                                                                                                                                                                                                                                                                                                                                                                                                               |                                                                                                                                                                                                                                                                                                                                                                                                                                                                                                                    |
| <p><b>49-96 h:</b></p> <p>Temblor intenso, delirium tremens (5% de los pacientes [25% de mortalidad]) Inestabilidad autonómica severa</p> <p>Confusión /</p>                               |                                                                                                                                                                                                                                                                                                                                                                                                                                                                                                                                                                                                                                                                                                                                                                                                                                                                                                                                                                                                                                                                                                                                                                                                                                                                                               |                                                                                                                                                                                                                                                                                                                                                                                                                                                                                                                    |

|                                                 |                                                                                                                                                                                                                                                                                                                                                                                                                                                                                                                                                                                                                                                                                                                                                                                                                                                                                                                                                                       |                                  |
|-------------------------------------------------|-----------------------------------------------------------------------------------------------------------------------------------------------------------------------------------------------------------------------------------------------------------------------------------------------------------------------------------------------------------------------------------------------------------------------------------------------------------------------------------------------------------------------------------------------------------------------------------------------------------------------------------------------------------------------------------------------------------------------------------------------------------------------------------------------------------------------------------------------------------------------------------------------------------------------------------------------------------------------|----------------------------------|
| <p>desorientación / agitación extrema (427)</p> | <p>Fenobarbital: 260 mg, seguido dosis intravenosa (130 mg) (427)</p> <ul style="list-style-type: none"> <li>• <u>Propofol</u></li> </ul> <p>Eficaz como adyuvante pero no ofrecer ventaja sobre la DEX. Puede prolongar la duración de la ventilación mecánica y la estancia en UCI. Su uso se debe considerar en pacientes en ventilaciones mecánicas y/o muy sensibles a los efectos cardiovasculares de DEX (427)</p> <ul style="list-style-type: none"> <li>• <u>Ketamina:</u> Terapia adyuvante en conjunto con BZD</li> </ul> <p>Dosis de infusión fue de 0.20 mg / kg / hora (intervalo entre cuartos 0.12–0.23) (427)</p> <ul style="list-style-type: none"> <li>• <u>Carbamazepina y ácido Valproico:</u></li> </ul> <p>Los estudios indicaron resultados variados</p> <p>La CBZ se asoció con más eventos adversos (<math>p &lt; 0,001</math>), especialmente alteraciones del SNC (<math>p &lt; 0,001</math>).</p> <p>Carbamacepina: 600-799 mg (427)</p> | <p>estancia prolongada.(427)</p> |
|-------------------------------------------------|-----------------------------------------------------------------------------------------------------------------------------------------------------------------------------------------------------------------------------------------------------------------------------------------------------------------------------------------------------------------------------------------------------------------------------------------------------------------------------------------------------------------------------------------------------------------------------------------------------------------------------------------------------------------------------------------------------------------------------------------------------------------------------------------------------------------------------------------------------------------------------------------------------------------------------------------------------------------------|----------------------------------|

## Síndrome de Abstinencia por opioides. Grado de Recomendación Condicional

Moderado

| Sintomatología                                                                                                                                                                                                                                                                                                                                                                                                 | Medidas Farmacológicas                                                                                                                                                                                                                                                                                                                                                                                                                                                                                                                                                                                                                                                                                                                               | Observaciones                                                                                                                                                                                                                                                                                                                                                                                                                                                                                                                                                                                                           |
|----------------------------------------------------------------------------------------------------------------------------------------------------------------------------------------------------------------------------------------------------------------------------------------------------------------------------------------------------------------------------------------------------------------|------------------------------------------------------------------------------------------------------------------------------------------------------------------------------------------------------------------------------------------------------------------------------------------------------------------------------------------------------------------------------------------------------------------------------------------------------------------------------------------------------------------------------------------------------------------------------------------------------------------------------------------------------------------------------------------------------------------------------------------------------|-------------------------------------------------------------------------------------------------------------------------------------------------------------------------------------------------------------------------------------------------------------------------------------------------------------------------------------------------------------------------------------------------------------------------------------------------------------------------------------------------------------------------------------------------------------------------------------------------------------------------|
| <p>Fiebre, taquicardia, hipotensión, Inquietud, irritabilidad, insomnio, diaforesis, midriasis, lagrimeo, rinorrea, Náusea, diarrea, abdominal, mialgia, artralgia. (432)</p> <p>Escala clínica de abstinencia a Opiáceos (COWS siglas en inglés) (433,434)</p> <p>Puntuación:</p> <p>5 a 12 = leve;</p> <p>13 a 24 = moderado;</p> <p>25 a 36 = moderadamente severo;</p> <p>&gt;36 = abstinencia severa.</p> | <p><b>Primera Línea:</b></p> <p>Terapia agonista opioide:</p> <p>Puede estabilizar el síndrome y continuarse como tratamiento a largo plazo.</p> <p>•<i>Metadona:</i></p> <p>Dosis Inicial 10 a 30 mg/día, titularla hasta una dosis máxima de 20 a 40 mg/día</p> <p>*** Se puede continuarse a largo plazo</p> <p>Clínica Moderada:</p> <p>•<i>Buprenorfina:</i> Se recomienda solo en caso de clínica moderada. (432)</p> <p>Dosis Inicial 0.6mg/día hasta 6mg/día. (435)</p> <p><b>Segunda Línea:</b></p> <p>Alfa-adrenérgicos:</p> <p>•<i>Clonidina:</i> Con vigilancia estricta de la presión arterial.</p> <p>Dosis: de 0,1 a 0,2 mg cada 6 horas.</p> <p>•<i>La dexmedetomidina:</i> como coadyuvantes farmacológico. Muy poca evidencia.</p> | <p>La severidad de la abstinencia y el cálculo para el seguimiento puede realizarse utilizando instrumentos como:</p> <ul style="list-style-type: none"> <li>○ Escala clínica de abstinencia a Opiáceos o Clinical Opioid Withdrawal Scale (COWS)</li> <li>○ La Escala clínica de retirada de opiáceos o Subjective Opioid Withdrawal Scale (SOWS)</li> <li>○ la Escala objetiva de retirada de opiáceos O Objective Opioid Withdrawal Scale (OOWS) (431–433,437)</li> </ul> <p>•La buprenorfina tiene limitaciones ya que puede bloquear el efecto analgésico de los opioide y si se inicia demasiado pronto puede</p> |

|  |                               |                                                                                                                      |
|--|-------------------------------|----------------------------------------------------------------------------------------------------------------------|
|  | Dosis: (0,3 µg/kg/hora) (436) | precipitar la abstinencia. Así mismo, se ha demostrado no tener efectos adversos con duración menor a 11 días. (435) |
|--|-------------------------------|----------------------------------------------------------------------------------------------------------------------|

## Síndrome de Abstinencia por Benzodiacepinas. Grado de Recomendación Condicional

Moderado

| Sintomatología                                                                                                       | Medidas Farmacológicas                                                                                                                                                                                                                                                                                                                                                                                                                                                 | Observaciones                                                                                                                                                                                                                                                       |
|----------------------------------------------------------------------------------------------------------------------|------------------------------------------------------------------------------------------------------------------------------------------------------------------------------------------------------------------------------------------------------------------------------------------------------------------------------------------------------------------------------------------------------------------------------------------------------------------------|---------------------------------------------------------------------------------------------------------------------------------------------------------------------------------------------------------------------------------------------------------------------|
| Taquicardia, hipertensión, agitación, alucinaciones, temblores y convulsiones (por hiperactividad autonómica ) (432) | <p><b>Primera Línea:</b></p> <p><i>Benzodiacepinas (BZN)</i>, Se recomienda el programa graduado por síntomas.</p> <ul style="list-style-type: none"> <li>• <b>Lorazepam:</b> 4.8- 6.5 mg (moderado), 10.4 mg (severo)</li> </ul> <p>Ó <i>Clonazepam:</i> 4mg/ día, duración promedio 4 días (Vía oral).</p> <p>****<i>Diazepam</i> (sedación Profunda): 10 mg reevaluando cada 15 min para obtener un RASS 0, -2, una vez en meta evaluar cada 4 horas. (427,428)</p> | <ul style="list-style-type: none"> <li>• Sigue el mismo protocolo de uso de benzodiacepinas que el de abstinencia por alcohol, con BZN de acción prolongada en dosis decrecientes a lo largo del tiempo</li> <li>• NO existe un tiempo máximo de retiro.</li> </ul> |

|  |                                                                                                                                                                                                                                                                      |  |
|--|----------------------------------------------------------------------------------------------------------------------------------------------------------------------------------------------------------------------------------------------------------------------|--|
|  | <ul style="list-style-type: none"><li>• Pacientes con uso Crónico (Ej: Síndrome de Ansiedad) se debe considerar un programa de disminución progresiva con una benzodiacepina de acción prolongada y un tratamiento para el trastorno subyacente. (431,432)</li></ul> |  |
|--|----------------------------------------------------------------------------------------------------------------------------------------------------------------------------------------------------------------------------------------------------------------------|--|

**Síndrome de Abstinencia por Cocaína y Anfetaminas.** Grado de Recomendación

Condicional Moderado

| Sintomatología                                                                                                           | Medidas de soporte                   | Medidas Farmacológicas                                                                                             |
|--------------------------------------------------------------------------------------------------------------------------|--------------------------------------|--------------------------------------------------------------------------------------------------------------------|
| Estado de ánimo deprimido, Fatiga, Sueños vívidos, Insomnio, Apetito incrementado, Retraso Psicomotor y agitación. (432) | • Proveer medidas de soporte general | La abstinencia de cocaína y anfetaminas suele ser leve, por lo cual se maneja con medidas de soporte básico. (438) |

## Síndrome de Abstinencia por Canabinoides. Grado de Recomendación Condicional

Moderado

| Sintomatología                                                               | Medidas de soporte                   | Medidas Farmacológicas                                                                                                                                                                                                                                                                                         |
|------------------------------------------------------------------------------|--------------------------------------|----------------------------------------------------------------------------------------------------------------------------------------------------------------------------------------------------------------------------------------------------------------------------------------------------------------|
| Ansiedad, Taquicardia, hipertensión, Temblor, diaforesis, náusea, Pesadillas | • Proveer medidas de soporte general | <p>Los síntomas aparecen al corto tiempo de interrupción. Sin embargo es poco probable que el síndrome de abstinencia sea clínicamente significativo, aun mas en pacientes en UCI.</p> <p>Hay pocos estudios del uso de THC (Tetrahidrocannabinol) como tratamiento para el síndrome de abstinencia. (432)</p> |

## Conclusiones

Para la elaboración de esta nueva versión de las guías se plantearon preguntas sobre temas que no se habían abordado en las guías anteriores, otras fueron preguntas sobre temas que ya se habían revisado pero sobre los que se quiso hacer una actualización. El grupo revisó la mejor evidencia disponible para responderlas, encontrando que solo seis preguntas tenían un alto nivel de evidencia, mientras que el nivel fue moderado y bajo para la gran mayoría. La fuerza de las recomendaciones dependió no solo de la calidad de la evidencia disponible (siendo éste el criterio más importante) sino también de la relevancia que el consenso de expertos le dio a cada intervención. De esta manera se hicieron algunas recomendaciones fuertes y muchas más recomendaciones condicionales.

Las recomendaciones fuertes se basan en siete puntos:

1. Evaluación del dolor: Se hace énfasis en la importancia de una adecuada evaluación del dolor mediante escalas para cada escenario y tipo de paciente y así ofrecer un manejo y seguimiento óptimo.
2. Educación: Educación al paciente y a la familia acerca de las intervención que se van a realizar, así como sus indicaciones, alcances, ventajas, limitaciones y riesgo.
3. Opioides y analgesia multimodal: En el manejo del dolor moderado a severo, los opioides siguen estando en la primera línea de manejo. Sin embargo, cada vez se reconocen más los efectos adversos del uso y abuso de los opioides, por lo cual se deben buscar diferentes alternativas analgésicas dentro de una estrategia multimodal con el fin de disminuir la exposición a estos.
4. Sedación ligera: Evaluar la necesidad de sedación o no de cada paciente con el fin de ofrecer comodidad, manteniendo un nivel de sedación lo más superficial posible y usando la sedación profunda solo cuando está indicada y cuando la evidencia ha demostrado beneficios.
5. Delirium: Abordar el delirium del paciente crítico desde el momento del ingreso, haciendo predicción del riesgo, prevención, detección, y manejo. En prevención y manejo hay medidas farmacológicas y no farmacológicas que han mostrado beneficios con nivel de evidencia desde alto hasta bajo.
6. Movilización temprana: Reducir el desacondicionamiento en UCI mediante la movilización temprana, pasiva y activa cuando su condición clínica lo permita, mediante protocolos, disminuyendo estancias y mejorando la independencia funcional y la calidad de vida de los pacientes al egreso.



7. Menor interrupción del sueño: Promover un sueño de calidad con menor fragmentación.

Las medidas no farmacológicas como la reducción del ruido y la iluminación nocturna, entre otras, tienen mejor evidencia que las medidas farmacológicas.

Otras recomendaciones han sido presentadas en este documento como condicionales, lo cual no quiere decir que estas intervenciones no sean importantes, pues aunque la evidencia disponible que las soporta tiene un nivel inferior, el grupo ha considerado proponerlas en beneficio del paciente crítico. El juicio clínico al lado del paciente con el conocimiento de las mejores estrategias, ayudarán a tomar mejores decisiones.

### **Financiación**

El desarrollo de las guías fue posible con el apoyo incondicional de la Federación Panamericana e Ibérica de Sociedades de Medicina Crítica y Terapia Intensiva (FEPIMCTI), el Hospital Universitario Fundación Santa Fe de Bogotá (FSFB), la Asociación Colombiana de Medicina Crítica y Cuidado Intensivo (AMCI), y un Grant Educativo Irestricto de Pfizer.

### **Conflicto de interés**

Los miembros del grupo Consenso declaran los siguientes conflictos de intereses: J.C. Díaz, investigador principal o secundario en estudios patrocinados por Abbot, Aspen, Amarey, Glaxo, conferencista para Aspen, Baxter, B.Braun, Dräger, Hamilton, Hospira y Glaxo; G. Castorena, conferencista de MSD para Sugamadex; G. Castillo Abrego Conferencista de

Medtronic y Zoll Medical; J.M. Pardo, apoyo para asistir a congresos por MSD y Sanofi Aventis. Los demás no refieren conflicto de interés.

## **AGRADECIMIENTOS**

A la Asociación Colombiana de Medicina crítica y Cuidado Intensivo (AMCI) por su soporte en la elaboración de la guía.

Al Hospital Universitario Fundación Santa Fe de Bogotá por su soporte académico y administrativo en la elaboración de la guía. Especialmente a Alexandra Suarez por su ayuda en la organización de la logística y trabajo de secretaría en la elaboración del escrito de la guía.

## **Exoneración**

Es importante recordar que las guías son solo una herramienta útil para mejorar las decisiones médicas, y que deben ser utilizadas teniendo en cuenta el criterio médico, circunstancias clínicas, preferencias de los pacientes, y la disponibilidad de los medios locales. También conviene recordar que nuevos resultados de la investigación clínica pueden proporcionar nuevas evidencias que hagan necesario cambiar la práctica usual, aun antes de que estas guías sean actualizadas.

## Bibliografía

1. Mansouri P, Javadpour S, Zand F, Ghodsbin F, Sabetian G, Masjedi M, et al. Implementation of a protocol for integrated management of pain, agitation, and delirium can improve clinical outcomes in the intensive care unit: a randomized clinical trial. *J Crit Care*. 2013 Dec;28(6):918–22.
2. Dale CR, Bryson CL, Fan VS, Maynard C, Yanez ND, Treggiari MM. A greater analgesia, sedation, delirium order set quality score is associated with a decreased duration of mechanical ventilation in cardiovascular surgery patients. *Crit Care Med*. 2013 Nov;41(11):2610–7.
3. Olsen BF, Rustøen T, Sandvik L, Jacobsen M, Valeberg BT. Results of implementing a pain management algorithm in intensive care unit patients: The impact on pain assessment, length of stay, and duration of ventilation. *J Crit Care*. 2016 Dec;36:207–11.
4. Vincent J-L, Shehabi Y, Walsh TS, Pandharipande PP, Ball JA, Spronk P, et al. Comfort and patient-centred care without excessive sedation: the eCASH concept. *Intensive Care Med*. 2016 Jun;42(6):962–71.
5. Schelling G. Post-traumatic stress disorder in somatic disease: lessons from critically ill patients. *Prog Brain Res*. 2008;167:229–37.
6. Awissi D-K, Bégin C, Moisan J, Lachaine J, Skrobik Y. I-SAVE study: impact of sedation, analgesia, and delirium protocols evaluated in the intensive care unit: an economic evaluation. *Ann Pharmacother*. 2012 Jan;46(1):21–8.

7. Barr J, Pandharipande PP. The pain, agitation, and delirium care bundle: synergistic benefits of implementing the 2013 Pain, Agitation, and Delirium Guidelines in an integrated and interdisciplinary fashion. *Crit Care Med*. 2013 Sep;41(9 Suppl 1):S99-115.
8. Glowacki D. Effective pain management and improvements in patients' outcomes and satisfaction. *Crit Care Nurse*. 2015 Jun;35(3):33–41; quiz 43.
9. Mattia C, Savoia G, Paoletti F, Piazza O, Albanese D, Amantea B, Ambrosio F, Belfiore B, Berti M, Bertini L, Bruno F, Carassiti M, Celleno D, Coluzzi F, Consales G, Costantini A, Cuppini F, De Gaudio RA, Farnia A, Finco G, Gravino E, Guberti A, Laurenzi TRS. SIAARTI recommendations for analgo-sedation in intensive care unit. *Minerva Anesthesiol*. 2006;72(10):769–805.
10. Sessler CN, Varney K. Patient-focused sedation and analgesia in the ICU. *Chest*. 2008 Feb;133(2):552–65.
11. Egerod I. Cultural changes in ICU sedation management. *Qual Health Res*. 2009;19(5):687–96.
12. Shehabi Y, Riker RR, Bokesch PM, Wisemandle W, Shintani A, Ely EW. Delirium duration and mortality in lightly sedated, mechanically ventilated intensive care patients. *Crit Care Med*. 2010 Dec;38(12):2311–8.
13. Celis-Rodriguez E, Birchenall C, de la Cal MA, Castorena Arellano G, Hernandez A, Ceraso D, et al. Clinical practice guidelines for evidence-based management of sedoanalgesia in critically ill adult patients. *Med intensiva*. 2013 Nov;37(8):519–74.
14. Strøm T, Martinussen T, Toft P. A protocol of no sedation for critically ill patients

receiving mechanical ventilation: a randomised trial. *Lancet* (London, England).

2010 Feb;375(9713):475–80.

15. Cazorla C, Cravoisy A, Gibot S, Nace L, Levy B, Bollaert P-É. Patients' perception of their experience in the intensive care unit. *Press Medicale*. 2007;36(2 I):211–6.
16. Puntillo KA, Max A, Timsit J-F, Ruckly S, Chanques G, Robleda G, et al. Pain distress: the negative emotion associated with procedures in ICU patients. *Intensive Care Med*. 2018 Sep;44(9):1493–501.
17. Pandharipande PP, Patel MB, Barr J. Management of pain, agitation, and delirium in critically ill patients. *Pol Arch Med Wewn*. 2014;124(3):114–23.
18. Capdevila M, Ramin S, Capdevila X. Regional anesthesia and analgesia after surgery in ICU. *Curr Opin Crit Care*. 2017 Oct;23(5):430–9.
19. Wiech K, Tracey I. The influence of negative emotions on pain: Behavioral effects and neural mechanisms. *Neuroimage*. 2009;47(3):987–94.
20. Klages U, Kianifard S, Ulusoy O, Wehrbein H. Anxiety sensitivity as predictor of pain in patients undergoing restorative dental procedures. *Community Dent Oral Epidemiol*. 2006;34(2):139–45.
21. Shehabi Y, Bellomo R, Reade MC, Bailey M, Bass F, Howe B, et al. Early intensive care sedation predicts long-term mortality in ventilated critically ill patients. *Am J Respir Crit Care Med*. 2012;186(8):724–31.
22. Brook AD, Ahrens TS, Schaiff R, Prentice D, Sherman G, Shannon W, et al. Effect of a nursing-implemented sedation protocol on the duration of mechanical

- ventilation. *Crit Care Med*. 1999 Dec;27(12):2609–15.
23. Quenot J-P, Ladoire S, Devoucoux F, Doise J-M, Cailliod R, Cunin N, et al. Effect of a nurse-implemented sedation protocol on the incidence of ventilator-associated pneumonia. *Crit Care Med*. 2007 Sep;35(9):2031–6.
  24. Robinson BRH, Mueller EW, Henson K, Branson RD, Barsoum S, Tsuei BJ. An analgesia-delirium-sedation protocol for critically ill trauma patients reduces ventilator days and hospital length of stay. *J Trauma*. 2008 Sep;65(3):517–26.
  25. Kress JP, Pohlman AS, O'Connor MF, Hall JB. Daily interruption of sedative infusions in critically ill patients undergoing mechanical ventilation. *N Engl J Med*. 2000 May;342(20):1471–7.
  26. Faust AC, Rajan P, Sheperd LA, Alvarez CA, McCorstin P, Doebele RL. Impact of an Analgesia-Based Sedation Protocol on Mechanically Ventilated Patients in a Medical Intensive Care Unit. *Anesth Analg*. 2016 Oct;123(4):903–9.
  27. MacLaren R, Plamondon JM, Ramsay KB, Rocker GM, Patrick WD, Hall RI. A prospective evaluation of empiric versus protocol-based sedation and analgesia. *Pharmacotherapy*. 2000 Jun;20(6):662–72.
  28. Park G, Lane M, Rogers S, Bassett P. A comparison of hypnotic and analgesic based sedation in a general intensive care unit. *Br J Anaesth*. 2007 Jan;98(1):76–82.
  29. Breen D, Karabinis A, Malbrain M, Morais R, Albrecht S, Jarnvig I-L, et al. Decreased duration of mechanical ventilation when comparing analgesia-based sedation using remifentanyl with standard hypnotic-based sedation for up to 10 days in intensive care unit patients: a randomised trial [ISRCTN47583497]. *Crit Care*.

2005;9(3):R200–10.

30. Girard TD, Kress JP, Fuchs BD, Thomason JW, Schweickert WD, Pun BT, et al. Efficacy and safety of a paired sedation and ventilator weaning protocol for mechanically ventilated patients in intensive care (Awakening and Breathing Controlled trial): a randomised controlled trial. *Lancet*. 2008;371(9607):126–34.
31. Bugedo G, Tobar E, Aguirre M, Gonzalez H, Godoy J, Lira MT, et al. The implementation of an analgesia-based sedation protocol reduced deep sedation and proved to be safe and feasible in patients on mechanical ventilation. *Rev Bras Ter intensiva*. 2013;25(3):188–96.
32. Treggiari MM, Romand J-A, Yanez ND, Deem SA, Goldberg J, Hudson L, et al. Randomized trial of light versus deep sedation on mental health after critical illness. *Crit Care Med*. 2009 Sep;37(9):2527–34.
33. Rivosecchi RM, Kane-Gill SL, Svec S, Campbell S, Smithburger PL. The implementation of a nonpharmacologic protocol to prevent intensive care delirium. *J Crit Care*. 2016 Feb;31(1):206–11.
34. Skrobik Y, Ahern S, Leblanc M, Marquis F, Awissi DK, Kavanagh BP. Protocolized intensive care unit management of analgesia, sedation, and delirium improves analgesia and subsyndromal delirium rates. *Anesth Analg*. 2010 Aug;111(2):451–63.
35. de Wit M, Gennings C, Jenvey WI, Epstein SK. Randomized trial comparing daily interruption of sedation and nursing-implemented sedation algorithm in medical intensive care unit patients. *Crit Care*. 2008;12(3):R70.
36. Mehta S, Burry L, Cook D, Fergusson D, Steinberg M, Granton J, et al. Daily

- sedation interruption in mechanically ventilated critically ill patients cared for with a sedation protocol: a randomized controlled trial. *JAMA*. 2012 Nov;308(19):1985–92.
37. Carson SS, Kress JP, Rodgers JE, Vinayak A, Campbell-Bright S, Levitt J, et al. A randomized trial of intermittent lorazepam versus propofol with daily interruption in mechanically ventilated patients. *Crit Care Med*. 2006 May;34(5):1326–32.
38. Nydahl P, Sricharoenchai T, Chandra S, Kundt FS, Huang M, Fischill M, et al. Safety of Patient Mobilization and Rehabilitation in the Intensive Care Unit. Systematic Review with Meta-Analysis. *Ann Am Thorac Soc*. 2017 May;14(5):766–77.
39. Dantas CM, Silva PFDS, Siqueira FHT de, Pinto RMF, Matias S, Maciel C, et al. Influence of early mobilization on respiratory and peripheral muscle strength in critically ill patients. *Rev Bras Ter intensiva*. 2012 Jun;24(2):173–8.
40. Kallet RH, Zhuo H, Yip V, Gomez A, Lipnick MS. Spontaneous Breathing Trials and Conservative Sedation Practices Reduce Mechanical Ventilation Duration in Subjects With ARDS. Vol. 63, *Respiratory care*. United States; 2018. p. 1–10.
41. Moon K-J, Lee S-M. The effects of a tailored intensive care unit delirium prevention protocol: A randomized controlled trial. *Int J Nurs Stud*. 2015 Sep;52(9):1423–32.
42. Bryczkowski SB, Lopreiato MC, Yonclas PP, Sacca JJ, Mosenthal AC. Delirium prevention program in the surgical intensive care unit improved the outcomes of older adults. *J Surg Res*. 2014 Jul;190(1):280–8.
43. Trompeo AC, Vidi Y, Locane MD, Braghiroli A, Mascia L, Bosma K, et al. Sleep



disturbances in the critically ill patients: role of delirium and sedative agents.

Minerva Anesthesiol. 2011 Jun;77(6):604–12.

44. Alexopoulou C, Kondili E, Diamantaki E, Psarologakis C, Kokkini S, Bolaki M, et al. Effects of dexmedetomidine on sleep quality in critically ill patients: a pilot study. *Anesthesiology*. 2014 Oct;121(4):801–7.
45. Barnes-Daly MA, Phillips G, Ely EW. Improving Hospital Survival and Reducing Brain Dysfunction at Seven California Community Hospitals: Implementing PAD Guidelines Via the ABCDEF Bundle in 6,064 Patients. *Crit Care Med*. 2017 Feb;45(2):171–8.
46. Black P, Boore JRP, Parahoo K. The effect of nurse-facilitated family participation in the psychological care of the critically ill patient. *J Adv Nurs*. 2011 May;67(5):1091–101.
47. Kawazoe Y, Miyamoto K, Morimoto T, Yamamoto T, Fuke A, Hashimoto A, et al. Effect of dexmedetomidine on mortality and ventilator-free days in patients requiring mechanical ventilation with sepsis a randomized clinical trial. *JAMA - J Am Med Assoc*. 2017;317(13):1321–8.
48. Pandharipande PP, Pun BT, Herr DL, Maze M, Girard TD, Miller RR, et al. Effect of sedation with dexmedetomidine vs lorazepam on acute brain dysfunction in mechanically ventilated patients: the MENDS randomized controlled trial. *JAMA*. 2007 Dec;298(22):2644–53.
49. Abdelmalik PA, Rakocevic G. Propofol as a Risk Factor for ICU-Acquired Weakness in Septic Patients with Acute Respiratory Failure. *Can J Neurol Sci*. 2017

May;44(3):295–303.

50. Marler J, Mohrien K, Kimmons LA, Vandigo JE, Oliphant CS, Boucher AN, et al. Effects of propofol on vasopressor use in patients with sepsis and severe sepsis: A pilot study. *J Crit Care*. 2016 Oct;35:155–60.
51. Yu T, Peng X, Liu L, Li Q, Huang Y, Guo F, et al. Propofol increases preload dependency in septic shock patients. *J Surg Res*. 2015 Feb;193(2):849–55.
52. Durbin CGJ. Sedation of the agitated, critically ill patient without an artificial airway. *Crit Care Clin*. 1995 Oct;11(4):913–36.
53. Huang Z, Chen Y, Yang Z, Liu J. Dexmedetomidine versus midazolam for the sedation of patients with non-invasive ventilation failure. *Intern Med*. 2012;51(17):2299–305.
54. Morandi A, Brummel NE, Ely EW. Sedation, delirium and mechanical ventilation: the “ABCDE” approach. *Curr Opin Crit Care*. 2011 Feb;17(1):43–9.
55. Balas MC, Vasilevskis EE, Olsen KM, Schmid KK, Shostrom V, Cohen MZ, et al. Effectiveness and safety of the awakening and breathing coordination, delirium monitoring/management, and early exercise/mobility bundle. *Crit Care Med*. 2014 May;42(5):1024–36.
56. Klompas M, Anderson D, Trick W, Babcock H, Kerlin MP, Li L, et al. The preventability of ventilator-associated events. The CDC Prevention Epicenters Wake Up and Breathe Collaborative. *Am J Respir Crit Care Med*. 2015 Feb;191(3):292–301.

57. Trogrlic Z, van der Jagt M, Bakker J, Balas MC, Ely EW, van der Voort PHJ, et al. A systematic review of implementation strategies for assessment, prevention, and management of ICU delirium and their effect on clinical outcomes. *Crit Care*. 2015 Apr;19:157.
58. Garrett KM. Best Practices for Managing Pain, Sedation, and Delirium in the Mechanically Ventilated Patient. *Crit Care Nurs Clin North Am*. 2016 Dec;28(4):437–50.
59. Conway, Jim; Johnson, Bev; Edgman-Levitan, Susan; Simmons L. Partnering with Patients and Families To Design a Patient- and Family-Centered Health Care System. A Roadmap for the Future. <http://www.ipfcc.org/resources/Roadmap.pdf>. 2006.
60. DiGioia A 3rd, Greenhouse PK, Levison TJ. Patient and family-centered collaborative care: an orthopaedic model. *Clin Orthop Relat Res*. 2007 Oct;463:13–9.
61. Lee MD, Friedenberg AS, Mukpo DH, Conray K, Palmisciano A, Levy MM. Visiting hours policies in New England intensive care units: strategies for improvement. *Crit Care Med*. 2007 Feb;35(2):497–501.
62. Powers PH, Goldstein C, Plank G, Thomas K, Conkright L. The value of patient- and family-centered care. *Am J Nurs*. 2000 May;100(5):84–8.
63. Happ MB, Swigart VA, Tate JA, Arnold RM, Sereika SM, Hoffman LA. Family presence and surveillance during weaning from prolonged mechanical ventilation. *Heart Lung*. 2007;36(1):47–57.

64. Hupcey JE, Zimmerman HE. The need to know: experiences of critically ill patients. *Am J Crit Care*. 2000 May;9(3):192–8.
65. Williams CMA. The identification of family members' contribution to patients' care in the intensive care unit: a naturalistic inquiry. *Nurs Crit Care*. 2005;10(1):6–14.
66. Mitchell ML, Chaboyer W. Family Centred Care--a way to connect patients, families and nurses in critical care: a qualitative study using telephone interviews. *Intensive Crit care Nurs*. 2010 Jun;26(3):154–60.
67. Mitchell ML, Coyer F, Kean S, Stone R, Murfield J, Dwan T. Patient, family-centred care interventions within the adult ICU setting: An integrative review. Vol. 29, *Australian Critical Care*. 2016. p. 179–93.
68. Olsen KD, Dysvik E, Hansen BS. The meaning of family members' presence during intensive care stay: a qualitative study. *Intensive Crit care Nurs*. 2009 Aug;25(4):190–8.
69. Puthuchearry ZA, Rawal J, McPhail M, Connolly B, Ratnayake G, Chan P, et al. Acute skeletal muscle wasting in critical illness. *JAMA*. 2013 Oct;310(15):1591–600.
70. Fan E, Dowdy DW, Colantuoni E, Mendez-Tellez PA, Sevransky JE, Shanholtz C, et al. Physical complications in acute lung injury survivors: a two-year longitudinal prospective study. *Crit Care Med*. 2014 Apr;42(4):849–59.
71. Stevens RD, Marshall SA, Cornblath DR, Hoke A, Needham DM, de Jonghe B, et al. A framework for diagnosing and classifying intensive care unit-acquired weakness. *Crit Care Med*. 2009 Oct;37(10 Suppl):S299-308.

72. Fan E, Cheek F, Chlan L, Gosselink R, Hart N, Herridge MS, et al. An official American Thoracic Society Clinical Practice guideline: the diagnosis of intensive care unit-acquired weakness in adults. *Am J Respir Crit Care Med*. 2014 Dec;190(12):1437–46.
73. Hermans G, Van Mechelen H, Clerckx B, Vanhullebusch T, Mesotten D, Wilmer A, et al. Acute outcomes and 1-year mortality of intensive care unit-acquired weakness. A cohort study and propensity-matched analysis. *Am J Respir Crit Care Med*. 2014 Aug;190(4):410–20.
74. Schaller SJ, Anstey M, Blobner M, Edrich T, Grabitz SD, Gradwohl-Matis I, et al. Early, goal-directed mobilisation in the surgical intensive care unit: a randomised controlled trial. *Lancet (London, England)*. 2016 Oct;388(10052):1377–88.
75. Ramos Dos Santos PM, Aquaroni Ricci N, Aparecida Bordignon Suster E, de Moraes Paisani D, Dias Chiavegato L. Effects of early mobilisation in patients after cardiac surgery: a systematic review. *Physiotherapy*. 2017 Mar;103(1):1–12.
76. Doiron KA, Hoffmann TC, Beller EM. Early intervention (mobilization or active exercise) for critically ill adults in the intensive care unit. *Cochrane database Syst Rev*. 2018 Mar;3:CD010754.
77. Tipping CJ, Harrold M, Holland A, Romero L, Nisbet T, Hodgson CL. The effects of active mobilisation and rehabilitation in ICU on mortality and function: a systematic review. *Intensive Care Med*. 2017 Feb;43(2):171–83.
78. de Queiroz RS, Saquetto MB, Martinez BP, Andrade EA, da Silva PAMP, Gomes-Neto M. Evaluation of the description of active mobilisation protocols for

mechanically ventilated patients in the intensive care unit: A systematic review of randomized controlled trials. *Heart Lung*. 2018 May;47(3):253–60.

79. Wright SE, Thomas K, Watson G, Baker C, Bryant A, Chadwick TJ, et al. Intensive versus standard physical rehabilitation therapy in the critically ill (EPICC): a multicentre, parallel-group, randomised controlled trial. *Thorax*. 2018 Mar;73(3):213–21.
80. Conceicao TMA da, Gonzales AI, Figueiredo FCXS de, Vieira DSR, Bundchen DC. Safety criteria to start early mobilization in intensive care units. Systematic review. *Rev Bras Ter intensiva*. 2017;29(4):509–19.
81. Seymour CW, Pandharipande PP, Hudson LD, Thompson JL, Shintani AK, Ely EW, et al. Liberation From Mechanical Ventilation and Delirium. 2013;40(10):2788–96.
82. Burry L, Cook D, Herridge M, Devlin JW, Fergusson D, Meade M, et al. Recall of ICU stay in patients managed with a sedation protocol or a sedation protocol with daily interruption. *Crit Care Med*. 2015;43(10):2180–90.
83. Tian SY, Zou L, Quan X, Zhang Y, Xue FS, Ye TH. Effect of midazolam on memory: A study of process dissociation procedure and functional magnetic resonance imaging. *Anaesthesia*. 2010;65(6):586–94.
84. Zaal IJ, Devlin JW, Hazelbag M, Klein Klouwenberg PMC, van der Kooi AW, Ong DSY, et al. Benzodiazepine-associated delirium in critically ill adults. *Intensive Care Med*. 2015 Dec;41(12):2130–7.
85. Lu X, Li J, Li T, Zhang J, Li ZB, Gao XJ, et al. Clinical study of midazolam sequential with dexmedetomidine for agitated patients undergoing weaning to

implement light sedation in intensive care unit. *Chinese J Traumatol - English Ed* [Internet]. 2016;19(2):94–6. Available from: <http://dx.doi.org/10.1016/j.cjtee.2015.09.007>

86. Constantin JM, Momon A, Mantz J, Payen JF, De Jonghe B, Perbet S, et al. Efficacy and safety of sedation with dexmedetomidine in critical care patients: A meta-analysis of randomized controlled trials. *Anaesth Crit Care Pain Med*. 2016;35(1):7–15.
87. Bellante F, Legros B, Depondt C, Créteur J, Taccone FS, Gaspard N. Midazolam and thiopental for the treatment of refractory status epilepticus: a retrospective comparison of efficacy and safety. *J Neurol*. 2016;263(4):799–806.
88. Fernandez A, Lantigua H, Lesch C, Shao B, Foreman B, Schmidt JM, Hirsch LJ, Mayer SA, Claassen J. High-dose midazolam infusion for refractory status epilepticus. *Neurology*. 2014 Jan 28;82(4):359-65.
89. Ferraz Gonçalves JA, Almeida A, Costa I, Silva P, Carneiro R. Comparison of Haloperidol Alone and in Combination with Midazolam for the Treatment of Acute Agitation in an Inpatient Palliative Care Service. *J Pain Palliat Care Pharmacother*. 2016;30(4):284–8.
90. Zhu Y, Wang Y, Du B, Xi X. Could remifentanil reduce duration of mechanical ventilation in comparison with other opioids for mechanically ventilated patients? A systematic review and meta-analysis. *Crit Care*. 2017;21(1).
91. Greco M, Landoni G, Biondi-Zoccai G, Cabrini L, Ruggeri L, Pasculli N, et al. Remifentanil in cardiac surgery: A meta-analysis of randomized controlled trials. *J*

Cardiothorac Vasc Anesth [Internet]. 2012;26(1):110–6. Available from:

<http://dx.doi.org/10.1053/j.jvca.2011.05.007>

92. Muellejans B, Matthey T, Scholpp J, Schill M. Sedation in the intensive care unit with remifentanil/propofol versus midazolam/fentanyl: A randomised, open-label, pharmacoeconomic trial. *Crit Care*. 2006;10(3).
93. Bjelland TW, Dale O, Kaisen K, Haugen BO, Lydersen S, Strand K, et al. Propofol and remifentanil versus midazolam and fentanyl for sedation during therapeutic hypothermia after cardiac arrest: A randomised trial. *Intensive Care Med*. 2012;38(6):959–67.
94. Belhadj Amor M, Ouezini R, Lamine K, Barakette M, Labbene I, Ferjani M. [Daily interruption of sedation in intensive care unit patients with renal impairment: remifentanil-midazolam compared to fentanyl-midazolam]. *Ann Fr Anesth Reanim*. 2007 Dec;26(12):1041–4.
95. Karabinis A, Mandragos K, Stergiopoulos S, Komnos A, Soukup J, Speelberg B, et al. Safety and efficacy of analgesia-based sedation with remifentanil versus standard hypnotic-based regimens in intensive care unit patients with brain injuries: a randomised, controlled trial [ISRCTN50308308]. *Crit Care*. 2004 Aug;8(4):R268-80.
96. Muellejans B, López A, Cross MH, Bonome C, Morrison L, Kirkham AJT. Remifentanil versus fentanyl for analgesia based sedation to provide patient comfort in the intensive care unit: a randomized, double-blind controlled trial [ISRCTN43755713]. *Crit Care* [Internet]. 2004;8(1):R1–11. Available from:



[http://www.pubmedcentral.nih.gov/articlerender.fcgi?artid=420059&tool=pmcentrez  
&rendertype=abstract](http://www.pubmedcentral.nih.gov/articlerender.fcgi?artid=420059&tool=pmcentrez&rendertype=abstract)

97. Rivosecchi RM, Rice MJ, Smithburger PL, Buckley MS, Coons JC, Kane-Gill SL. An evidence based systematic review of remifentanil associated opioid-induced hyperalgesia. *Expert Opin Drug Saf*. 2014 May;13(5):587–603.
98. Fan H, Zhao Y, Sun M, Ye J, Chen G, Zhu J. Dexmedetomidine Based Sedation for Post-surgery Critically Ill Adults : A Meta-analysis of Randomized Controlled Trials. 2017;46(12):1611–22.
99. Rosenzweig AB, Sittambalam CD. A new approach to the prevention and treatment of delirium in elderly patients in the intensive care unit. *J Community Hosp Intern Med Perspect* [Internet]. 2015;5(4):27950. Available from: <https://www.tandfonline.com/doi/full/10.3402/jchimp.v5.27950>
100. Martin E, Ramsay G, Mantz J, Sum-Ping STJ. The role of the alpha2-adrenoceptor agonist dexmedetomidine in postsurgical sedation in the intensive care unit. *J Intensive Care Med*. 2003;18(1):29–41.
101. Herr DL, Sum-Ping STJ, England M. ICU sedation after coronary artery bypass graft surgery: dexmedetomidine-based versus propofol-based sedation regimens. *J Cardiothorac Vasc Anesth*. 2003 Oct;17(5):576–84.
102. Park JB, Bang SH, Chee HK, Kim JS, Lee SA, Shin JK. Efficacy and safety of dexmedetomidine for postoperative delirium in adult cardiac surgery on cardiopulmonary bypass. *Korean J Thorac Cardiovasc Surg*. 2014 Jun;47(3):249–54.
103. Balkanay OO, Goksedef D, Omeroglu SN, Ipek G. The dose-related effects of

- dexmedetomidine on renal functions and serum neutrophil gelatinase-associated lipocalin values after coronary artery bypass grafting: a randomized, triple-blind, placebo-controlled study. *Interact Cardiovasc Thorac Surg*. 2015 Feb;20(2):209–14.
104. Abd Aziz N, Chue MC, Yong CY, Hassan Y, Awaisu A, Hassan J, et al. Efficacy and safety of dexmedetomidine versus morphine in post-operative cardiac surgery patients. *Int J Clin Pharm*. 2011 Apr;33(2):150–4.
  105. Mueller SW, Preslaski CR, Kiser TH, Fish DN, Lavelle JC, Malkoski SP, et al. A randomized, double-blind, placebo-controlled dose range study of dexmedetomidine as adjunctive therapy for alcohol withdrawal. *Crit Care Med*. 2014;42(5):1131–9.
  106. Tan JA, Ho KM. Use of dexmedetomidine as a sedative and analgesic agent in critically ill adult patients: A meta-analysis. *Intensive Care Med*. 2010;36(6):926–39.
  107. Triltsch AE, Welte M, von Homeyer P, Grosse J, Genahr A, Moshirzadeh M, et al. Bispectral index-guided sedation with dexmedetomidine in intensive care: a prospective, randomized, double blind, placebo-controlled phase II study. *Crit Care Med*. 2002 May;30(5):1007–14.
  108. Memis D, Hekimoglu S, Vatan I, Yandim T, Yuksel M, Sut N. Effects of midazolam and dexmedetomidine on inflammatory responses and gastric intramucosal pH to sepsis, in critically ill patients. *Br J Anaesth*. 2007 Apr;98(4):550-2
  109. Memis D, Dokmeci D, Karamanlioglu B, Turan A, Ture M. A comparison of the effect on gastric emptying of propofol or dexmedetomidine in critically ill patients: preliminary study. *Eur J Anaesthesiol*. 2006 Aug;23(8):700–4.
  110. Elbaradie S, El Mahalawy FH, Solyman AH. Dexmedetomidine vs. propofol for

- short-term sedation of postoperative mechanically ventilated patients. *J Egypt Natl Canc Inst.* 2004 Sep;16(3):153–8.
111. Tasdogan M, Memis D, Sut N, Yuksel M. Results of a pilot study on the effects of propofol and dexmedetomidine on inflammatory responses and intraabdominal pressure in severe sepsis. *J Clin Anesth.* 2009 Sep;21(6):394–400.
  112. Venn RM, Grounds RM. Comparison between dexmedetomidine and propofol for sedation in the intensive care unit: patient and clinician perceptions. *Br J Anaesth.* 2001 Nov;87(5):684–90.
  113. Akin S, Aribogan A, Arslan G. Dexmedetomidine as an adjunct to epidural analgesia after abdominal surgery in elderly intensive care patients: A prospective, double-blind, clinical trial. *Curr Ther Res Clin Exp.* 2008 Feb;69(1):16–28.
  114. Esmaoglu A, Ulgey A, Akin A, Boyaci A. Comparison between dexmedetomidine and midazolam for sedation of eclampsia patients in the intensive care unit. *J Crit Care.* 2009 Dec;24(4):551–5.
  115. Riker, RR; Shehabi, Y; Bokesch, PM; Ceraso, D; Wisemandle, W; Koura, F; Whitten, P; Margolis, BD; Byrne, DW; Ely, EW; Rocha, MG; SEDCOM (Safety and Efficacy of Dexmedetomidine Compared With Midazolam) Study Group. Dexmedetomidine vs midazolam for sedation of critically ill patients: a randomized trial. *Jama* [Internet]. 2009;301(5):489. Available from: <http://jama.jamanetwork.com/article.aspx?doi=10.1001/jama.2009.56>
  116. Maldonado JR, Wysong A, van der Starre PJA, Block T, Miller C, Reitz BA. Dexmedetomidine and the reduction of postoperative delirium after cardiac surgery.

Psychosomatics. 2009;50(3):206–17.

117. Reade MC, O’Sullivan K, Bates S, Goldsmith D, Ainslie WRSTJ, Bellomo R. Dexmedetomidine vs. haloperidol in delirious, agitated, intubated patients: a randomised open-label trial. *Crit Care*. 2009;13(3):R75.
118. Su X, Meng ZT, Wu XH, Cui F, Li HL, Wang DX, et al. Dexmedetomidine for prevention of delirium in elderly patients after non-cardiac surgery: a randomised, double-blind, placebo-controlled trial. *Lancet* [Internet]. 2016;388(10054):1893–902. Available from: [http://dx.doi.org/10.1016/S0140-6736\(16\)30580-3](http://dx.doi.org/10.1016/S0140-6736(16)30580-3)
119. FDA. Dexmedetomidine Draft Labeling [Internet]. 1999. p. 1–13. Available from: [https://www.accessdata.fda.gov/drugsatfda\\_docs/label/1999/21038lbl.pdf](https://www.accessdata.fda.gov/drugsatfda_docs/label/1999/21038lbl.pdf)
120. FDA. Highlights of Prescribing Information [Internet]. 2016. Available from: [https://www.accessdata.fda.gov/drugsatfda\\_docs/label/2016/021038s027lbl.pdf](https://www.accessdata.fda.gov/drugsatfda_docs/label/2016/021038s027lbl.pdf)
121. INVIMA. Resolución No. 2016002729 [Internet]. 2016. Available from: [http://web.sivicos.gov.co/registros/pdf/1402230\\_2016002729.pdf](http://web.sivicos.gov.co/registros/pdf/1402230_2016002729.pdf)
122. Newswire P. Hospira Japan Receives Approval for New Indication for “Precedex IV™ 200ug” [Internet]. 2010. Available from: <https://www.prnewswire.com/news-releases/hospira-japan-receives-approval-for-new-indication-for-precedex-iv-200ug-101272464.html>
123. EMA. Date of issue of marketing authorization valid throughout the European Union [Internet]. 2011. Available from: [https://www.ema.europa.eu/documents/assessment-report/dexdor-epar-public-assessment-report\\_en.pdf](https://www.ema.europa.eu/documents/assessment-report/dexdor-epar-public-assessment-report_en.pdf)

124. EMA. Dexdor. Procedural steps taken and scientific information after the authorisation. 2018; Available from:  
  
[https://www.ema.europa.eu/documents/procedural-steps-after/dexdor-epar-procedural-steps-taken-scientific-information-after-authorisation\\_en-0.pdf](https://www.ema.europa.eu/documents/procedural-steps-after/dexdor-epar-procedural-steps-taken-scientific-information-after-authorisation_en-0.pdf)
125. Kunisawa T. Dexmedetomidine hydrochloride as a long-term sedative. *Ther Clin Risk Manag.* 2011;7:291–9.
126. Ozaki M, Takeda J, Tanaka K, Shiokawa Y, Nishi S, Matsuda K, et al. Safety and efficacy of dexmedetomidine for long-term sedation in critically ill patients. *J Anesth.* 2014;28(1):38–50.
127. Shehabi Y, Ruettimann U, Adamson H, Innes R, Ickeringill M. Dexmedetomidine infusion for more than 24 hours in critically ill patients: sedative and cardiovascular effects. *Intensive Care Med.* 2004 Dec;30(12):2188–96.
128. Wunsch H, Kahn JM, Kramer AA, Wagener G, Li G, Sladen RN, et al. Dexmedetomidine in the care of critically ill patients from 2001 to 2007: an observational cohort study. *Anesthesiology.* 2010 Aug;113(2):386–94.
129. Camarena, G; Zinker, E; Poblano, M; Aguirre, J; Martinez J. Seguridad de la dexmedetomidina en infusión de más de 24 horas. *Rev la Asoc Mex Med Crítica y Ter Intensiva [Internet].* 2005;19(1):10–4. Available from:  
  
<http://www.medigraphic.com/pdfs/medcri/ti-2005/ti051b.pdf>
130. Iirola T, Aantaa R, Laitio R, Kentala E, Lahtinen M, Wighton A, et al. Pharmacokinetics of prolonged infusion of high-dose dexmedetomidine in critically ill patients. *Crit Care.* 2011;15(5):R257.

131. Rashid MR, Najeeb R, Mushtaq S, Habib R. Comparative evaluation of midazolam, dexmedetomidine, and propofol as Intensive Care Unit sedatives in postoperative electively ventilated eclamptic patients. *J Anaesthesiol Clin Pharmacol*. 2017;33(3):331–6.
132. Cheng M, Shi J, Gao T, Shen J, Zhao C, Xi F, et al. The Addition of Dexmedetomidine to Analgesia for Patients After Abdominal Operations: A Prospective Randomized Clinical Trial. *World J Surg*. 2017;41(1):39–46.
133. Jakob SM, Ruokonen E, Grounds RM, Sarapohja T, Garratt C, Pocock SJ, et al. Dexmedetomidine vs midazolam or propofol for sedation during prolonged mechanical ventilation: two randomized controlled trials. *JAMA*. 2012 Mar;307(11):1151–60.
134. Maclaren R, Preslaski CR, Mueller SW, Kiser TH, Fish DN, Lavelle JC, et al. A randomized, double-blind pilot study of dexmedetomidine versus midazolam for intensive care unit sedation: Patient recall of their experiences and short-term psychological outcomes. *J Intensive Care Med*. 2015;30(3):167–75.
135. Reade MC, Eastwood GM, Bellomo R, Bailey M, Bersten A, Cheung B, et al. Effect of dexmedetomidine added to standard care on ventilator-free time in patients with agitated delirium a randomized clinical trial. *JAMA - J Am Med Assoc*. 2016;315(14):1460–8.
136. Vanderweide LA, Foster CJ, Maclaren R, Kiser TH, Fish DN, Mueller SW. Evaluation of Early Dexmedetomidine Addition to the Standard of Care for Severe Alcohol Withdrawal in the ICU. *J Intensive Care Med*. 2016;31(3):198–204.

137. Fujita Y, Inoue K, Sakamoto T, Yoshizawa S, Tomita M, Maeda Y, et al. A comparison between dosages and plasma concentrations of dexmedetomidine in clinically ill patients: a prospective, observational, cohort study in Japan. *J intensive care*. 2013 Dec 20;1(1):15.
138. DeMuro JP, Botros DG, Wirkowski E, Hanna AF. Use of dexmedetomidine for the treatment of alcohol withdrawal syndrome in critically ill patients: A retrospective case series. *J Anesth*. 2012;26(4):601–5.
139. Kruger BD, Kurmann J, Corti N, Spahn DR, Bettex D, Rudiger A. Dexmedetomidine-associated hyperthermia: A series of 9 cases and a review of the literature. *Anesth Analg*. 2017;125(6):1898–906.
140. Grayson K, Tobin AE, Lim TK, Reid DE, Ghani M. Dexmedetomidine-associated hyperthermia: a retrospective cohort study of intensive care unit admissions between 2009 and 2016. *Anaesth Intensive Care* [Internet]. 2017;45(6):727–36. Available from:  
  
<http://search.ebscohost.com/login.aspx?direct=true&db=cmedm&AN=29137584&sit e=eds-live>
141. Fraser GL, Devlin JW, Worby CP, Alhazzani W, Barr J, Dasta JF, et al. Benzodiazepine versus nonbenzodiazepine-based sedation for mechanically ventilated, critically ill adults: A systematic review and meta-analysis of randomized trials. *Crit Care Med*. 2013;41(9 SUPPL.1):30–8.
142. Sandiumenge Camps A, Sanchez-Izquierdo Riera JA, Toral Vazquez D, Sa Borges M, Peinado Rodriguez J, Altad Lopez E. Midazolam and 2% propofol in long-term

sedation of traumatized critically ill patients: efficacy and safety comparison. *Crit Care Med*. 2000 Nov;28(11):3612–9.

143. Ho KM, Ng JY. The use of propofol for medium and long-term sedation in critically ill adult patients: a meta-analysis. *Intensive Care Med*. 2008 Nov;34(11):1969–79.
144. Mesnil M, Capdevila X, Bringuier S, Trine P-O, Falquet Y, Charbit J, et al. Long-term sedation in intensive care unit: a randomized comparison between inhaled sevoflurane and intravenous propofol or midazolam. *Intensive Care Med*. 2011 Jun;37(6):933–41.
145. Chen K, Lu Z, Yc X, Cai Y, Chen Y, Sm P. Alpha- 2 agonists for long term sedation during mechanical ventilation in critically ill patients (Review). *Cochrane Database Syst Rev*. 2015;(1).
146. Terada Y, Inoue S, Konda M, Egawa J, Ueda J, Kirita T, et al. Effects of deep sedation under mechanical ventilation on cognitive outcome in patients undergoing surgery for oral and maxillofacial cancer and microvascular reconstruction. *Med Intensiva*. 2019 Jan - Feb;43(1):3-9
147. Kim HY, Lee JE, Kim HY, Kim J. Volatile sedation in the intensive care unit: A systematic review and meta-analysis. *Medicine (Baltimore)*. 2017 Dec;96(49):e8976.
148. Sackey P. Isoflurane for ICU sedation - dead or alive? *Eur J Anaesthesiol*. 2016 Jan;33(1):4–5.
149. Baron R, Binder A, Biniek R, Braune S, Buerkle H, Dall P, et al. Evidence and consensus based guideline for the management of delirium, analgesia, and sedation in intensive care medicine. Revision 2015 (DAS-Guideline 2015) - short version.



Ger Med Sci. 2015;13:Doc19.

150. Laferriere-Langlois P, D'Aragon F, Manzanares W. Halogenated volatile anesthetics in the intensive care unit: current knowledge on an upcoming practice. *Minerva Anesthesiol.* 2017 Jul;83(7):737–48.
151. Jabaudon M, Boucher P, Imhoff E, Chabanne R, Faure J-S, Roszyk L, et al. Sevoflurane for Sedation in Acute Respiratory Distress Syndrome. A Randomized Controlled Pilot Study. *Am J Respir Crit Care Med.* 2017 Mar;195(6):792–800.
152. Redaelli S, Mangili P, Ormas V, Sosio S, Peluso L, Ponzoni F, et al. Prolonged sedation in ARDS patients with inhaled anesthetics: our experience. Vol. 17, *Critical Care.* 2013. p. P386.
153. Bellgardt M, Bomberg H, Herzog-Niescery J, Dasch B, Vogelsang H, Weber TP, et al. Survival after long-term isoflurane sedation as opposed to intravenous sedation in critically ill surgical patients: Retrospective analysis. *Eur J Anaesthesiol.* 2016 Jan;33(1):6–13.
154. Jerath A, Panckhurst J, Parotto M, Lightfoot N, Wasowicz M, Ferguson ND, et al. Safety and Efficacy of Volatile Anesthetic Agents Compared With Standard Intravenous Midazolam/Propofol Sedation in Ventilated Critical Care Patients: A Meta-analysis and Systematic Review of Prospective Trials. *Anesth Analg.* 2017 Apr;124(4):1190–9.
155. Jerath A, Ferguson ND, Steel A, Wijeyesundera D, Macdonald J, Wasowicz M. The use of volatile anesthetic agents for long-term critical care sedation (VALTS): study protocol for a pilot randomized controlled trial. *Trials.* 2015 Dec 9;16:560.

156. Weinert CR, Sprenkle M. Post-ICU consequences of patient wakefulness and sedative exposure during mechanical ventilation. *Intensive Care Med.* 2015 Dec 9;16:560.
157. Granja C, Gomes E, Amaro A, Ribeiro O, Jones C, Carneiro A, et al. Understanding posttraumatic stress disorder-related symptoms after critical care: the early illness amnesia hypothesis. *Crit Care Med.* 2008 Oct;36(10):2801–9.
158. Needham DM, Davidson J, Cohen H, Hopkins RO, Weinert C, Wunsch H, et al. Improving long-term outcomes after discharge from intensive care unit: report from a stakeholders' conference. *Crit Care Med.* 2012 Feb;40(2):502–9.
159. Jones C, Skirrow P, Griffiths RD, Humphris GH, Ingleby S, Eddleston J, et al. Rehabilitation after critical illness: a randomized, controlled trial. *Crit Care Med.* 2003 Oct;31(10):2456–61.
160. Jones C, Griffiths RD, Humphris G, Skirrow PM. Memory, delusions, and the development of acute posttraumatic stress disorder-related symptoms after intensive care. *Crit Care Med.* 2001 Mar;29(3):573–80.
161. Larson MJ, Weaver LK, Hopkins RO. Cognitive sequelae in acute respiratory distress syndrome patients with and without recall of the intensive care unit. *J Int Neuropsychol Soc.* 2007 Jul;13(4):595–605.
162. Aitken LM, Castillo MI, Ullman A, Engstrom A, Cunningham K, Rattray J. What is the relationship between elements of ICU treatment and memories after discharge in adult ICU survivors?. *Aust Crit Care.* 2016 Feb;29(1):5-14.

163. Rattray J, Crocker C, Jones M, Connaghan J. Patients' perceptions of and emotional outcome after intensive care: results from a multicentre study. *Nurs Crit Care*. 2010;15(2):86–93.
164. Ringdal M, Plos K, Ortenwall P, Bergbom I. Memories and health-related quality of life after intensive care: a follow-up study. *Crit Care Med*. 2010 Jan;38(1):38–44.
165. Ethier C, Burry L, Martinez-Motta C, Tirgari S, Jiang D, McDonald E, et al. Recall of intensive care unit stay in patients managed with a sedation protocol or a sedation protocol with daily sedative interruption: a pilot study. *J Crit Care*. 2011 Apr;26(2):127–32.
166. Kress JP, Gehlbach B, Lacy M, Pliskin N, Pohlman AS, Hall JB. The long-term psychological effects of daily sedative interruption on critically ill patients. *Am J Respir Crit Care Med*. 2003 Dec;168(12):1457–61.
167. Svenningsen H, Egerod I, Dreyer P. Strange and scary memories of the intensive care unit: a qualitative, longitudinal study inspired by Ricoeur's interpretation theory. *J Clin Nurs*. 2016 Oct;25(19–20):2807–15.
168. Egerod I, Christensen D, Schwartz-Nielsen KH, Agard AS. Constructing the illness narrative: a grounded theory exploring patients' and relatives' use of intensive care diaries. *Crit Care Med*. 2011 Aug;39(8):1922–8.
169. Ullman AJ, Aitken LM, Rattray J, Kenardy J, Le Brocq R, MacGillivray S, et al. Intensive care diaries to promote recovery for patients and families after critical illness: A Cochrane Systematic Review. *Int J Nurs Stud*. 2015 Jul;52(7):1243–53.
170. Teece A, Baker J. Thematic Analysis: How do patient diaries affect survivors'

psychological recovery? *Intensive Crit care Nurs.* 2017 Aug;41:50–6.

171. Ullman AJ, Aitken LM, Rattray J, Kenardy J, Le Brocque R, MacGillivray S, et al. Diaries for recovery from critical illness. *Cochrane database Syst Rev.* 2014 Dec;(12):CD010468.
172. Boyadjiev I, Albanese J. [Sedation an acute respiratory distress syndrome]. *Ann Fr Anesth Reanim.* 2008;27(7–8):604–10.
173. Bourenne J, Hraiech S, Roch A, Gainnier M, Papazian L, Forel J-M. Sedation and neuromuscular blocking agents in acute respiratory distress syndrome. *Ann Transl Med.* 2017;5(14):291–291.
174. Buscher H, Vaidyanathan S, Al-Soufi S, Nguyen DN, Breeding J, Rycus P, et al. Sedation practice in veno-venous extracorporeal membrane oxygenation: an international survey. *ASAIO J.* 2013;59(6):636–41.
175. Shekar K, Roberts JA, Mullany D V, Corley A, Fisquet S, Bull TN, et al. Increased sedation requirements in patients receiving extracorporeal membrane oxygenation for respiratory and cardiorespiratory failure. *Anaesth Intensive Care.* 2012 Jul;40(4):648–55.
176. Marhong JD, DeBacker J, Viau-Lapointe J, Munshi L, Del Sorbo L, Burry L, et al. Sedation and Mobilization During Venovenous Extracorporeal Membrane Oxygenation for Acute Respiratory Failure: An International Survey. *Crit Care Med.* 2017 Nov;45(11):1893–9.
177. Floroff CK, Hassig TB, Cochran JB, Mazur JE. High-Dose Sedation and Analgesia During Extracorporeal Membrane Oxygenation: A Focus on the Adjunctive Use of

- Ketamine. *J Pain Palliat Care Pharmacother*. 2016;30(1):36–40.
178. Meiser A, Bomberg H, Lepper PM, Trudzinski FC, Volk T, Groesdonk H V. Inhaled Sedation in Patients With Acute Respiratory Distress Syndrome Undergoing Extracorporeal Membrane Oxygenation. *Anesth Analg*. 2017 Oct;125(4):1235–9.
  179. deBacker J, Tamberg E, Munshi L, Burry L, Fan E, Mehta S. Sedation Practice in Extracorporeal Membrane Oxygenation-Treated Patients with Acute Respiratory Distress Syndrome: A Retrospective Study. *ASAIO J*. 2018;64(4):544–51.
  180. Nigoghossian C Der, Dzierba AL, Etheridge J, Roberts R, Muir J, Brodie D, et al. Effect of Extracorporeal Membrane Oxygenation Use on Sedative Requirements in Patients with Severe Acute Respiratory Distress Syndrome. *Pharmacotherapy*. 2016 Jun;36(6):607–16.
  181. Patanwala AE, Martin JR, Erstad BL. Ketamine for Analgosedation in the Intensive Care Unit: A Systematic Review. *J Intensive Care Med*. 2017 Jul;32(6):387–95.
  182. Mazzeffi M, Johnson K, Paciullo C. Ketamine in adult cardiac surgery and the cardiac surgery Intensive Care Unit: an evidence-based clinical review. *Ann Card Anaesth*. 2015;18(2):202–9.
  183. Wang JG, Belley-Cote E, Burry L, Duffett M, Karachi T, Perri D, et al. Clonidine for sedation in the critically ill: a systematic review and meta-analysis. *Crit Care*. 2017 Feb;21(1):75.
  184. Liu X, Zhang K, Wang W, Xie G, Cheng B, Wang Y, et al. Dexmedetomidine Versus Propofol Sedation Improves Sublingual Microcirculation After Cardiac Surgery: A Randomized Controlled Trial. *J Cardiothorac Vasc Anesth*. 2016

Dec;30(6):1509–15.

185. Ice CJ, Personett HA, Frazee EN, Dierkhising RA, Kashyap R, Oeckler RA. Risk Factors for Dexmedetomidine-Associated Hemodynamic Instability in Noncardiac Intensive Care Unit Patients. *Anesth Analg*. 2016 Feb;122(2):462–9.
186. Lin YY, He B, Chen J, Wang ZN. Can dexmedetomidine be a safe and efficacious sedative agent in post-cardiac surgery patients? a meta-analysis. *Crit Care*. 2012 Sep;16(5):R169.
187. Soliman R, Zohry G. The myocardial protective effect of dexmedetomidine in high-risk patients undergoing aortic vascular surgery. *Ann Card Anaesth*. 2016;19(4):606–13.
188. Ji F, Li Z, Nguyen H, Young N, Shi P, Fleming N, et al. Perioperative dexmedetomidine improves outcomes of cardiac surgery. *Circulation*. 2013 Apr;127(15):1576–84.
189. Gerlach AT, Blais DM, Jones GM, Burcham PK, Stawicki SP, Cook CH, et al. Predictors of dexmedetomidine-associated hypotension in critically ill patients. *Int J Crit Illn Inj Sci*. 2016;6(3):109–14.
190. Ji F, Li Z, Young N, Moore P, Liu H. Perioperative dexmedetomidine improves mortality in patients undergoing coronary artery bypass surgery. *J Cardiothorac Vasc Anesth*. 2014 Apr;28(2):267–73.
191. Duncan D, Sankar A, Beattie WS, Wijeyesundera DN. Alpha-2 adrenergic agonists for the prevention of cardiac complications among adults undergoing surgery. *Cochrane database Syst Rev*. 2018 Mar;3:CD004126.

192. Lewis SR, Nicholson A, Reed SS, Kenth JJ, Alderson P, Smith AF. Anaesthetic and sedative agents used for electrical cardioversion. *Cochrane database Syst Rev*. 2015 Mar;(3):CD010824.
193. Kundra TS, Kaur P, Nagaraja PS, Manjunatha N. To evaluate dexmedetomidine as an additive to propofol for sedation for elective cardioversion in a cardiac intensive care unit: A double-blind randomized controlled trial. *Ann Card Anaesth*. 2017;20(3):337–40.
194. Desai PM, Kane D, Sarkar MS. Cardioversion: What to choose? Etomidate or propofol. *Ann Card Anaesth*. 2015;18(3):306–11.
195. Ozkan G, Ince ME, Eskin MB, Erol G, Kadan M, Ozgur G, et al. Sedoanalgesia for cardioversion: comparison of alfentanil, remifentanil and fentanyl combined with propofol and midazolam: a prospective, randomized, double-blind study. *Eur Rev Med Pharmacol Sci*. 2016;20(6):1140–8.
196. Souvatzis X, Kalogridaki M, Mavrakakis HE, Kanoupakis EM, Marouli D, Vardas P, et al. Adding fentanyl to etomidate fails to reduce painful recall of external direct current cardioversion in adults: a randomised trial. *Hellenic J Cardiol*. 2015;56(2):142–8.
197. Lobo R, Kiernan T. The use of conscious sedation in elective external direct current cardioversion: a single centre experience. *BMJ Qual Improv Rep*. 2015 May 12;4(1).
198. Stronati, G; Guerra, F; Silenzi, M; Capucci A. P666 Cardiologist-only management of deep sedation during emergency cardioversion of atrial fibrillation: the INSTEAD II trial. In: *Acute Cardiovascular Care 2018*. *Eur Hear J Acute Cardiovasc Care*

[Internet]. 2018 Mar 1;7(1\_suppl):4–361. Available from:

<https://doi.org/10.1177/2048872617751067>

199. Cadena R, Shoykhet M, Ratcliff JJ. Emergency Neurological Life Support: Intracranial Hypertension and Herniation. *Neurocrit Care*. 2017;27:82–8.
200. Abou El Fadl MH, O’Phelan KH. Management of Traumatic Brain Injury: An Update. Vol. 29, *Neurosurgery Clinics of North America*. 2018. p. 213–21.
201. Beretta L, de Vitis A, Grandi E. Sedation in neurocritical patients: Is it useful? Vol. 77, *Minerva Anestesiologica*. 2011. p. 828–34.
202. Carney N, Totten AM, O’Reilly C, Ullman JS, Hawryluk GWJ, Bell MJ, et al. Guidelines for the Management of Severe Traumatic Brain Injury, Fourth Edition. *Neurosurgery*. 2017;80(1):6–15.
203. Desai M, Jain A. Neuroprotection in traumatic brain injury. *J Neurosurg Sci*. 2018 Oct;62(5):563-573.
204. Paul G, Paul B. Sedation in neurological intensive care unit. *Ann Indian Acad Neurol*. 2013;16(2):194.
205. Payen J-F, Francony G, Canet C, Coppo F, Fauvage B. [Sedation in neurointensive care unit]. *Ann Fr Anesth Reanim*. 2009;28(12):1015–9.
206. Cornelius B, Webb E, Cornelius A, Smith KWG, Ristic S, Jain J, et al. Effect of sedative agent selection on morbidity, mortality and length of stay in patients with increase in intracranial pressure. *World J Emerg Med*. 2018;9(4):256.
207. Hijazi Y, Bodonian C, Bolon M, Salord F, Boulieu R. Pharmacokinetics and



haemodynamics of ketamine in intensive care patients with brain or spinal cord injury. *Br J Anaesth*. 2003;90(2):155–60.

208. Himmelseher S, Durieux ME. Revising a dogma: Ketamine for patients with neurological injury? Vol. 101, *Anesthesia and Analgesia*. 2005. p. 524–34.
209. Loflin R, Koyfman A. When used for sedation, does ketamine increase intracranial pressure more than fentanyl or sufentanil?. *Ann Emerg Med*. 2015 Jan;65(1):55-6.
210. Von der Brelie C, Seifert M, Rot S, Tittel A, Sanft C, Meier U, et al. Sedation of Patients with Acute Aneurysmal Subarachnoid Hemorrhage with Ketamine Is Safe and Might Influence the Occurrence of Cerebral Infarctions Associated with Delayed Cerebral Ischemia. *World Neurosurg*. 2017 Jan;97:374–82.
211. Wang X, Ding X, Tong Y, Zong J, Zhao X, Ren H, et al. Ketamine does not increase intracranial pressure compared with opioids: meta-analysis of randomized controlled trials. *J Anesth*. 2014;28(6):821–7.
212. Zeiler FA, Teitelbaum J, West M, Gillman LM. The ketamine effect on ICP in traumatic brain injury. Vol. 21, *Neurocritical Care*. 2014. p. 163–73.
213. Zeiler FA, Teitelbaum J, West M, Gillman LM. The ketamine effect on intracranial pressure in nontraumatic neurological illness. Vol. 29, *Journal of Critical Care*. 2014. p. 1096–106.
214. Petersen KD, Landsfeldt U, Cold GE, Petersen CB, Mau S, Hauerberg J, et al. Intracranial pressure and cerebral hemodynamic in patients with cerebral tumors: A randomized prospective study of patients subjected to craniotomy in propofol-fentanyl, isoflurane-fentanyl, or sevoflurane-fentanyl anesthesia. *Anesthesiology*.

2003;98(2):329–36.

215. Hutchens MP, Memtsoudis S, Sadovnikoff N. Propofol for sedation in neuro-intensive care. Vol. 4, Neurocritical Care. 2006. p. 54–62.
216. Jones GM, Doecker BA, Erdman MJ, Kimmons LA, Eljovich L. Predictors of severe hypotension in neurocritical care patients sedated with propofol. Neurocrit Care. 2014;20(2):270–6.
217. Erdman MJ, Doecker BA, Gerlach AT, Phillips GS, Eljovich L, Jones GM. A comparison of severe hemodynamic disturbances between dexmedetomidine and propofol for sedation in neurocritical care patients. Crit Care Med. 2014;42(7):1696–702.
218. Mirrakhimov AE, Voore P, Halytskyy O, Khan M, Ali AM. Propofol infusion syndrome in adults: A clinical update. Crit Care Res Pract. 2015; 2015: 260385.
219. Oddo M, Crippa IA, Mehta S, Menon D, Payen JF, Taccone FS, et al. Optimizing sedation in patients with acute brain injury. Crit Care [Internet]. 2016;20(1). Available from: <http://dx.doi.org/10.1186/s13054-016-1294-5>
220. Forster A, Juge O, Morel D. Effects of midazolam on cerebral hemodynamics and cerebral vasomotor responsiveness to carbon dioxide. J Cereb Blood Flow Metab. 1983;3(2):246–9.
221. Robin M, Xavier T, Anjusha T, Kuriakose M, Agrawal D. Effect of intravenous midazolam on intracranial pressure during endotracheal suctioning in patients with severe head injury. J Neuroanaesth Crit Care. 2017;4(3):167.

222. Afonso J, Reis F. Dexmedetomidine: Current Role in Anesthesia and Intensive Care. *Brazilian J Anesthesiol.* 2012;62(1):118–33.
223. Grof TM, Bledsoe KA. Evaluating the use of dexmedetomidine in neurocritical care patients. *Neurocrit Care.* 2010;12(3):356–61.
224. P ajoumand M, Kufera JA, Bonds BW, Devabhakthuni S, Boswell S, Hesselton K, et al. Dexmedetomidine as an adjunct for sedation in patients with traumatic brain injury. *J Trauma Acute Care Surg.* 2016 Aug;81(2):345-51.
225. Schomer KJ, Sebat CM, Adams JY, Duby JJ, Shahlaie K, Louie EL. Dexmedetomidine for Refractory Intracranial Hypertension. *J Intensive Care Med.* 2019 Jan;34(1):62-66.
226. Tran A, Blinder H, Hutton B, English SW. A Systematic Review of Alpha-2 Agonists for Sedation in Mechanically Ventilated Neurocritical Care Patients. *Neurocrit Care.* 2018;28(1):12–25.
227. Tsaousi GG, Lamperti M, Bilotta F. Role of dexmedetomidine for sedation in neurocritical care patients: A qualitative systematic review and meta-analysis of current evidence. *Clin Neuropharmacol.* 2016;39(3):144–51.
228. Mahmoud L, Zullo AR, Thompson BB, Wendell LC. Outcomes of protocolised analgesia and sedation in a neurocritical care unit. *Brain Inj.* 2018;32(7):941–7.
229. Bassin SL, Bleck TP. Barbiturates for the treatment of intracranial hypertension after traumatic brain injury. *Crit Care.* 2008;12(5):185.
230. Pérez-Bárcena J, Llompart-Pou JA, Homar J, Abadal JM, Raurich JM, Frontera G, et

- al. Pentobarbital versus thiopental in the treatment of refractory intracranial hypertension in patients with traumatic brain injury: A randomized controlled trial. *Crit Care*. 2008;12(4).
231. Roberts I, Sydenham E. Barbiturates for acute traumatic brain injury. *Cochrane Database Syst Rev*. 2012;(12):CD000033.
232. Thorat JD, Wang EC, Lee KK, Seow WT, Ng I. Barbiturate therapy for patients with refractory intracranial hypertension following severe traumatic brain injury: Its effects on tissue oxygenation, brain temperature and autoregulation. *J Clin Neurosci*. 2008;15(2):143–8.
233. Anifantaki S, Prinianakis G, Vitsaksaki E, Katsouli V, Mari S, Symianakis A, et al. Daily interruption of sedative infusions in an adult medical-surgical intensive care unit: randomized controlled trial. *J Adv Nurs*. 2009 May;65(5):1054–60.
234. Skoglund K, Enblad P, Marklund N. Effects of the neurological wake-up test on intracranial pressure and cerebral perfusion pressure in brain-injured patients. *Neurocrit Care*. 2009;11(2):135–42.
235. Helbok R, Kurtz P, Schmidt MJ, Stuart MR, Fernandez L, Connolly SE, et al. Effects of the neurological wake-up test on clinical examination, intracranial pressure, brain metabolism and brain tissue oxygenation in severely brain-injured patients. *Crit Care*. 2012;16(6).
236. Skoglund K, Hillered L, Purins K, Tsitsopoulos PP, Flygt J, Engquist H, et al. The neurological wake-up test does not alter cerebral energy metabolism and oxygenation in patients with severe traumatic brain injury. *Neurocrit Care*.

2014;20(3):413–26.

237. Marklund N. The neurological wake-up test-a role in neurocritical care monitoring of traumatic brain injury Patients? .Front Neurol. 2017 Oct 17;8:540.
238. Roberts DJ, Haroon B, Hall RI. Sedation for critically ill or injured adults in the intensive care unit: a shifting paradigm. Drugs. 2012 Oct;72(14):1881–916.
239. Morad A, Farrokh S, Papangelou A. Pain management in neurocritical care; An update. Vol. 24, Current Opinion in Critical Care. 2018. p. 72–9.
240. Hungerford J, Tobias J. Sedation for children with moderate to severe TBI: Remifentanyl. Crit Care Med. 2014;42(12 SUPPL. 1):A1519.
241. Petzold A, Girbes A. Pain management in neurocritical care. Neurocrit Care. 2013;19(2):232–56.
242. Ehieli E, Yalamuri S, Brudney CS, Pyati S. Analgesia in the surgical intensive care unit. Postgrad Med J. 2017 Jan;93(1095):38–45.
243. Keating GM. Dexmedetomidine: A Review of Its Use for Sedation in the Intensive Care Setting. Drugs. 2015;75(10):1119–30.
244. Wilhelm W, Kreuer S. The place for short-acting opioids: Special emphasis on remifentanyl. Crit Care. 2008;12 (Suppl 3):S5.
245. Karamchandani K, Rewari V, Trikha A, Batra RK. Bispectral index correlates well with Richmond agitation sedation scale in mechanically ventilated critically ill patients. J Anesth. 2010 Jun;24(3):394–8.
246. Wang Z-H, Chen H, Yang Y-L, Shi Z-H, Guo Q-H, Li Y-W, et al. Bispectral Index

- Can Reliably Detect Deep Sedation in Mechanically Ventilated Patients: A Prospective Multicenter Validation Study. *Anesth Analg*. 2017 Jul;125(1):176–83.
247. Watson PL, Shintani AK, Tyson R, Pandharipande PP, Pun BT, Ely EW. Presence of electroencephalogram burst suppression in sedated, critically ill patients is associated with increased mortality. *Crit Care Med*. 2008 Dec;36(12):3171–7.
  248. Murray MJ, DeBlock H, Erstad B, Gray A, Jacobi J, Jordan C, et al. Clinical Practice Guidelines for Sustained Neuromuscular Blockade in the Adult Critically Ill Patient. *Crit Care Med*. 2016 Nov;44(11):2079–103.
  249. West N, McBeth PB, Brodie SM, van Heusden K, Sunderland S, Dumont GA, et al. Feasibility of continuous sedation monitoring in critically ill intensive care unit patients using the NeuroSENSE WAVCNS index. *J Clin Monit Comput*. 2018 Feb;
  250. Zheng J, Gao Y, Xu X, Kang K, Liu H, Wang H, et al. Correlation of bispectral index and Richmond agitation sedation scale for evaluating sedation depth: a retrospective study. *J Thorac Dis*. 2018 Jan;10(1):190–5.
  251. Olson DM, Zomorodi MG, James ML, Cox CE, Moretti EW, Riemen KE, et al. Exploring the impact of augmenting sedation assessment with physiologic monitors. *Aust Crit Care*. 2014 Aug;27(3):145–50.
  252. Le Roux P, Menon DK, Citerio G, Vespa P, Bader MK, Brophy G, et al. The International Multidisciplinary Consensus Conference on Multimodality Monitoring in Neurocritical Care: a list of recommendations and additional conclusions: a statement for healthcare professionals from the Neurocritical Care Society and the European. *Neurocrit Care*. 2014 Dec;21 Suppl 2:S282-96.

253. Weatherburn C, Endacott R, Tynan P, Bailey M. The impact of bispectral index monitoring on sedation administration in mechanically ventilated patients. *Anaesth Intensive Care*. 2007 Apr;35(2):204–8.
254. Arbour R. Impact of bispectral index monitoring on sedation and outcomes in critically ill adults: a case series. *Crit Care Nurs Clin North Am*. 2006 Jun;18(2):227–41, xi.
255. Haenggi M, Ypparila-Wolters H, Bieri C, Steiner C, Takala J, Korhonen I, et al. Entropy and bispectral index for assessment of sedation, analgesia and the effects of unpleasant stimuli in critically ill patients: an observational study. *Crit Care*. 2008;12(5):R119.
256. Arbour R, Waterhouse J, Seckel MA, Bucher L. Correlation between the Sedation-Agitation Scale and the Bispectral Index in ventilated patients in the intensive care unit. *Heart Lung*. 2009;38(4):336–45.
257. Messner M, Beese U, Romstock J, Dinkel M, Tschaikowsky K. The bispectral index declines during neuromuscular block in fully awake persons. *Anesth Analg*. 2003 Aug;97(2):488–91, table of contents.
258. Aho AJ, Lyytikainen L-P, Yli-Hankala A, Kamata K, Jantti V. Explaining Entropy responses after a noxious stimulus, with or without neuromuscular blocking agents, by means of the raw electroencephalographic and electromyographic characteristics. *Br J Anaesth*. 2011 Jan;106(1):69–76.
259. Inoue S, Kawaguchi M, Sasaoka N, Hirai K, Furuya H. Effects of neuromuscular block on systemic and cerebral hemodynamics and bispectral index during moderate

- or deep sedation in critically ill patients. *Intensive Care Med.* 2006 Mar;32(3):391–7.
260. Lu C-H, Man K-M, Ou-Yang H-Y, Chan S-M, Ho S-T, Wong C-S, et al. Composite auditory evoked potential index versus bispectral index to estimate the level of sedation in paralyzed critically ill patients: a prospective observational study. *Anesth Analg.* 2008 Oct;107(4):1290–4.
261. Dasta JF, Kane SL, Gerlach AT, Cook CH. Bispectral Index in the intensive care setting. *Crit Care Med.* 2003 Mar;31(3):998-9
262. Shetty RM, Bellini A, Wijayatilake DS, Hamilton MA, Jain R, Karanth S, et al. BIS monitoring versus clinical assessment for sedation in mechanically ventilated adults in the intensive care unit and its impact on clinical outcomes and resource utilization. *Cochrane database Syst Rev.* 2018 Feb;2:CD011240.
263. Titsworth WL, Abram J, Guin P, Herman MA, West J, Davis NW, et al. A prospective time-series quality improvement trial of a standardized analgesia protocol to reduce postoperative pain among neurosurgery patients. *J Neurosurg.* 2016 Dec;125(6):1523–32.
264. Hajiesmaeili MR, Safari S. Pain Medicine Pain Management in the Intensive Care Unit : Do We Need Special. 2012;1(4):237–8.
265. Practice Guidelines for Acute Pain Management in the Perioperative Setting: An Updated Report by the American Society of Anesthesiologists Task Force on Acute Pain Management. *Anesthesiology.* 2012 Feb;116(2):248-73.
266. Schneider R, Puetz A, Vassiliou T, Wiesmann T, Lewan U, Wulf H, et al. The Benefit of Benzodiazepine Reduction: Improving Sedation in Surgical Intensive



Care. *Indian J Crit Care Med*. 2017 May;21(5):274–80.

267. Liu D, Lyu J, Zhao H, An Y. The influence of analgesic-based sedation protocols on delirium and outcomes in critically ill patients: A randomized controlled trial. *PLoS One*. 2017;12(9):e0184310.
268. Greco M, Capretti G, Beretta L, Gemma M, Pecorelli N, Braga M. Enhanced Recovery Program in Colorectal Surgery: A Meta-analysis of Randomized Controlled Trials. *World J Surg*. 2014 Jun;38(6):1531–41.
269. Song W, Wang K, Zhang R, Dai Q, Zou S. The enhanced recovery after surgery (ERAS) program in liver surgery: a meta-analysis of randomized controlled trials. *Springerplus*. 2016 Feb;5(1):207.
270. Georgiou E, Hadjibalassi M, Lambrinou E, Andreou P, Papathanassoglou EDE. The Impact of Pain Assessment on Critically Ill Patients' Outcomes: A Systematic Review. *Biomed Res Int*. 2015 Oct;2015:1–18.
271. Ely EW. The ABCDEF Bundle: Science and Philosophy of How ICU Liberation Serves Patients and Families. *Crit Care Med*. 2017 Feb;45(2):321–30.
272. Frade-Mera MJ, Regueiro-Díaz N, Díaz-Castellano L, Torres-Valverde L, Alonso-Pérez L, Landívar-Redondo MM, et al. [A first step towards safer sedation and analgesia: A systematic evaluation of outcomes and level of sedation and analgesia in the mechanically ventilated critically ill patient]. *Enferm intensiva*. 2016 Oct;27(4):155–67.
273. Damico V, Cazzaniga F, Murano L, Ciceri R, Nattino G, Dal Molin A. Impact of a Clinical Therapeutic Intervention on Pain Assessment, Management, and Nursing

Practices in an Intensive Care Unit: A before-and-after Study. *Pain Manag Nurs*.

2018 Jun;19(3):256-66.

274. Porhomayon J, Nader ND, El-Solh AA, Hite M, Scott J, Silinskie K. Pre- and post-intervention study to assess the impact of a sedation protocol in critically ill surgical patients. *J Surg Res*. 2013 Oct;184(2):966-72.e4.
275. Dale CR, Kannas DA, Fan VS, Daniel SL, Deem S, Yanez ND, et al. Improved Analgesia, Sedation, and Delirium Protocol Associated with Decreased Duration of Delirium and Mechanical Ventilation. *Ann Am Thorac Soc*. 2014 Mar;11(3):367–74.
276. Dilokpattanamongkol P, Tangsujaritvijit V, Suansanae T, Suthisisang C. Impact of pharmaceutical care on pain and agitation in a medical intensive care unit in Thailand. *Int J Clin Pharm*. 2017 Jun;39(3):573–81.
277. Gelinas C, Puntillo KA, Joffe AM, Barr J. A validated approach to evaluating psychometric properties of pain assessment tools for use in nonverbal critically ill adults. *Semin Respir Crit Care Med*. 2013 Apr;34(2):153–68.
278. Kotfis K, Zegan-Barańska M, Szydłowski Ł, Żukowski M, Ely WE. Methods of pain assessment in adult intensive care unit patients - Polish version of the CPOT (Critical Care Pain Observation Tool) and BPS (Behavioral Pain Scale). *Anaesthesiol Intensive Ther*. 2017 Mar;49(1):66–72.
279. Wøien H, Stubhaug A, Bjørk IT. Analgesia and sedation of mechanically ventilated patients - a national survey of clinical practice. *Acta Anaesthesiol Scand*. 2012 Jan;56(1):23–9.

280. Bantel C, Laycock H, Ward S, Halmshaw C, Nagy I. Pain in Intensive Care: A Personalised Healthcare Approach. *J Intensive Care Soc.* 2013 Oct;14(4):312–8.
281. Stephens J, Wright M. Pain and Agitation Management in Critically Ill Patients. *Nurs Clin North Am.* 2016 Mar;51(1):95–106.
282. Puntillo KA, Max A, Timsit J-F, Vignoud L, Chanques G, Robleda G, et al. Determinants of procedural pain intensity in the intensive care unit. The Europain® study. *Am J Respir Crit Care Med.* 2014 Jan;189(1):39–47.
283. Faigeles B, Howie-Esquivel J, Miaskowski C, Stanik-Hutt J, Thompson C, White C, et al. Predictors and use of nonpharmacologic interventions for procedural pain associated with turning among hospitalized adults. *Pain Manag Nurs.* 2013 Jun;14(2):85–93.
284. Puntillo K, Ley SJ. Appropriately timed analgesics control pain due to chest tube removal. *Am J Crit Care.* 2004 Jul;13(4):292–302.
285. Futier E, Chanques G, Cayot Constantin S, Vernis L, Barres A, Guerin R, et al. Influence of opioid choice on mechanical ventilation duration and ICU length of stay. *Minerva Anesthesiol.* 2012;78(1):46–53.
286. Guedes L, Rebelo H, Oliveira R, Neves A. Regional Analgesia in Intensive Care. *Rev Bras Anesthesiol.* 2012;62(5):719–30.
287. Cipriano G, de Camargo Carvalho AC, Bernardelli GF, Tayar Peres PA. Short-term transcutaneous electrical nerve stimulation after cardiac surgery: effect on pain, pulmonary function and electrical muscle activity. *Interact Cardiovasc Thorac Surg.* 2008 Aug;7(4):539–43.

288. Solak O, Turna A, Pekcolaklar A, Metin M, Sayar A, Solak O, et al. Transcutaneous Electric Nerve Stimulation for the Treatment of Postthoracotomy Pain: A Randomized Prospective Study. *Thorac Cardiovasc Surg*. 2007 Apr;55(3):182–5.
289. Desantana JM, Sluka KA, Lauretti GR. High and low frequency TENS reduce postoperative pain intensity after laparoscopic tubal ligation: a randomized controlled trial. *Clin J Pain*. 2009 Jan;25(1):12–9.
290. Boitor M, Gélinas C, Richard-Lalonde M, Thombs BD. The Effect of Massage on Acute Postoperative Pain in Critically and Acutely Ill Adults Post-thoracic Surgery: Systematic Review and Meta-analysis of Randomized Controlled Trials. *Heart Lung*. 2017 Sep;46(5):339–46.
291. Matsota P, Christodouloupoulou T, Smyrnioti ME, Pandazi A, Kanellopoulos I, Koursoumi E, et al. Music's Use for Anesthesia and Analgesia. *J Altern Complement Med*. 2013 Apr;19(4):298–307.
292. Mofredj A, Alaya S, Tassaioust K, Bahloul H, Mrabet A. Music therapy, a review of the potential therapeutic benefits for the critically ill. *J Crit Care*. 2016 Oct;35:195–9.
293. Chlan LL, Weinert CR, Heiderscheit A, Tracy MF, Skaar DJ, Guttormson JL, et al. Effects of patient-directed music intervention on anxiety and sedative exposure in critically ill patients receiving mechanical ventilatory support: a randomized clinical trial. *JAMA*. 2013 Jun;309(22):2335–44.
294. Ahlers SJGM, van Gulik L, van Dongen EPA, Bruins P, van de Garde EMW, van Boven WJ, et al. Efficacy of an intravenous bolus of morphine 2.5 versus morphine

- 7.5 mg for procedural pain relief in postoperative cardiothoracic patients in the intensive care unit: a randomised double-blind controlled trial. *Anaesth Intensive Care*. 2012 May;40(3):417–26.
295. Khalil MA, Abdel Azeem MS. The impact of dexmedetomidine infusion in sparing morphine consumption in off-pump coronary artery bypass grafting. *Semin Cardiothorac Vasc Anesth*. 2013 Mar;17(1):66–71.
296. Wibbenmeyer L, Eid A, Liao J, Heard J, Horsfield A, Kral L, et al. Gabapentin is ineffective as an analgesic adjunct in the immediate postburn period. *J Burn Care Res*. 2014;35(2):136–42.
297. Oh J, Sohn J-H, Shin CS, Na SH, Yoon H-J, Kim J-J, et al. Mutual relationship between anxiety and pain in the intensive care unit and its effect on medications. *J Crit Care*. 2015 Oct;30(5):1043–8.
298. Jelacic S, Bollag L, Bowdle A, Rivat C, Cain KC, Richebe P. Intravenous Acetaminophen as an Adjunct Analgesic in Cardiac Surgery Reduces Opioid Consumption But Not Opioid-Related Adverse Effects: A Randomized Controlled Trial. *J Cardiothorac Vasc Anesth*. 2016 Aug;30(4):997–1004.
299. de Jong A, Molinari N, de Lattre S, Gniadek C, Carr J, Conseil M, et al. Decreasing severe pain and serious adverse events while moving intensive care unit patients: a prospective interventional study (the NURSE-DO project). *Crit Care*. 2013 Apr;17(2):R74.
300. Puntillo K, Pasero C, Li D, Mularski RA, Grap MJ, Erstad BL, et al. Evaluation of pain in ICU patients. *Chest*. 2009 Apr;135(4):1069–74.

301. Chanques G, Sebbane M, Barbotte E, Viel E, Eledjam JJ, Jaber S. A prospective study of pain at rest: incidence and characteristics of an unrecognized symptom in surgical and trauma versus medical intensive care unit patients. *Anesthesiology*. 2007 Nov;107(5): 858–60.
302. Joint Commission International. Joint Commission enhances pain assessment and management requirements for accredited hospitals. [Internet]. 37:7. 2017. Available from:  
[https://www.jointcommission.org/assets/1/18/Joint\\_Commission\\_Enhances\\_Pain\\_Assessment\\_and\\_Management\\_Requirements\\_for\\_Accredited\\_Hospitals1.PDF](https://www.jointcommission.org/assets/1/18/Joint_Commission_Enhances_Pain_Assessment_and_Management_Requirements_for_Accredited_Hospitals1.PDF)
303. Kiefer R-T, Rohr P, Ploppa A, Altemeyer K-H, Schwartzman RJ. Complete recovery from intractable complex regional pain syndrome, CRPS-type I, following anesthetic ketamine and midazolam. *Pain Pract*. 2007 Jun;7(2):147–50.
304. Bignami E, Castella A, Pota V, Saglietti F, Scognamiglio A, Trumello C, et al. Perioperative pain management in cardiac surgery: a systematic review. *Minerva Anesthesiol*. 2018 Apr;84(4):488–503.
305. Lee EN, Lee JH. The Effects of Low-Dose Ketamine on Acute Pain in an Emergency Setting: A Systematic Review and Meta-Analysis. *PLoS One*. 2016;11(10):e0165461.
306. Subramaniam K, Subramaniam B, Steinbrook RA. Ketamine as adjuvant analgesic to opioids: a quantitative and qualitative systematic review. *Anesth Analg*. 2004 Aug;99(2):482–95.
307. Bell RF, Dahl JB, Moore RA, Kalso E. Perioperative ketamine for acute

- postoperative pain. Cochrane database Syst Rev. 2006 Jan;(1):CD004603.
308. Block BM, Liu SS, Rowlingson AJ, Cowan AR, Cowan JAJ, Wu CL. Efficacy of postoperative epidural analgesia: a meta-analysis. JAMA. 2003 Nov;290(18):2455–63.
309. McNicol ED, Ferguson MC, Hudcova J. Patient controlled opioid analgesia versus non-patient controlled opioid analgesia for postoperative pain. Cochrane database Syst Rev. 2015 Jun;(6):CD003348.
310. Thomas M, Malmcrona R, Fillmore S, Shillingford J. Haemodynamic effects of morphine in patients with acute myocardial infarction. Br Heart J. 1965 Nov;27(6):863–75.
311. Meine TJ, Roe MT, Chen AY, Patel MR, Washam JB, Ohman EM, et al. Association of intravenous morphine use and outcomes in acute coronary syndromes: results from the CRUSADE Quality Improvement Initiative. Am Heart J. 2005 Jun;149(6):1043–9.
312. Puymirat E, Lamhaut L, Bonnet N, Aissaoui N, Henry P, Cayla G, et al. Correlates of pre-hospital morphine use in ST-elevation myocardial infarction patients and its association with in-hospital outcomes and long-term mortality: the FAST-MI (French Registry of Acute ST-elevation and non-ST-elevation Myocardial Infarction) pr. Eur Heart J. 2016 Apr;37(13):1063–71.
313. Parodi G, Bellandi B, Valenti R, Migliorini A, Marcucci R, Carrabba N, et al. Comparison of double (360 mg) ticagrelor loading dose with standard (60 mg) prasugrel loading dose in ST-elevation myocardial infarction patients: the Rapid

Activity of Platelet Inhibitor Drugs (RAPID) primary PCI 2 study. *Am Heart J*. 2014 Jun;167(6):909–14.

314. Montalescot G, van 't Hof AW, Lapostolle F, Silvain J, Lassen JF, Bolognese L, et al. Prehospital ticagrelor in ST-segment elevation myocardial infarction. *N Engl J Med*. 2014 Sep;371(11):1016–27.
315. Hobl E-L, Stimpfl T, Ebner J, Schoergenhofer C, Derhaschnig U, Sunder-Plassmann R, et al. Morphine decreases clopidogrel concentrations and effects: a randomized, double-blind, placebo-controlled trial. *J Am Coll Cardiol*. 2014 Feb;63(7):630–5.
316. Parodi G, Bellandi B, Xanthopoulou I, Capranzano P, Capodanno D, Valenti R, et al. Morphine is associated with a delayed activity of oral antiplatelet agents in patients with ST-elevation acute myocardial infarction undergoing primary percutaneous coronary intervention. *Circ Cardiovasc Interv*. 2015 Jan;8(1).
317. Kubica J, Adamski P, Ostrowska M, Sikora J, Kubica JM, Sroka WD, et al. Morphine delays and attenuates ticagrelor exposure and action in patients with myocardial infarction: the randomized, double-blind, placebo-controlled IMPRESSION trial. *Eur Heart J*. 2016 Jan;37(3):245–52.
318. Roffi M, Patrono C, Collet J-P, Mueller C, Valgimigli M, Andreotti F, et al. 2015 ESC Guidelines for the management of acute coronary syndromes in patients presenting without persistent ST-segment elevation: Task Force for the Management of Acute Coronary Syndromes in Patients Presenting without Persistent ST-Segment Elevation of . *Eur Heart J*. 2016 Jan;37(3):267–315.
319. Everts B, Karlson B, Abdon NJ, Herlitz J, Hedner T. A comparison of metoprolol



and morphine in the treatment of chest pain in patients with suspected acute myocardial infarction--the MEMO study. *J Intern Med*. 1999 Feb;245(2):133–41.

320. O’Gara PT, Kushner FG, Ascheim DD, Casey DEJ, Chung MK, de Lemos JA, et al. 2013 ACCF/AHA guideline for the management of ST-elevation myocardial infarction: a report of the American College of Cardiology Foundation/American Heart Association Task Force on Practice Guidelines. *Circulation*. 2013 Jan;127(4):e362-425.
321. Parodi G. Editor’s Choice-Chest pain relief in patients with acute myocardial infarction. *Eur Hear journal Acute Cardiovasc care*. 2016 Jun;5(3):277–81.
322. Conti CR. Intravenous morphine and chest pain. *Clin Cardiol*. 2011 Aug;34(8):464–5.
323. Fulton RL, Walters MR, Morton R, Touyz RM, Dominiczak AF, Morrison DS, et al. Acetaminophen use and risk of myocardial infarction and stroke in a hypertensive cohort. *Hypertens (Dallas, Tex 1979)*. 2015 May;65(5):1008–14.
324. Bavry AA, Khaliq A, Gong Y, Handberg EM, Cooper-Dehoff RM, Pepine CJ. Harmful effects of NSAIDs among patients with hypertension and coronary artery disease. *Am J Med*. 2011 Jul;124(7):614–20.
325. Haske D, Bottiger BW, Bouillon B, Fischer M, Gaier G, Gliwitzky B, et al. Analgesia in Patients with Trauma in Emergency Medicine. *Dtsch Arztebl Int*. 2017 Nov;114(46):785–92.
326. Kelly SJ, Moran JL, Williams PJ, Burns K, Rowland A, Miners JO, et al. Haemodynamic effects of parenteral vs. enteral paracetamol in critically ill patients:

- a randomised controlled trial. *Anaesthesia*. 2016 Oct;71(10):1153–62.
327. Vender JS, Szokol JW, Murphy GS, Nitsun M. Sedation, analgesia, and neuromuscular blockade in sepsis: an evidence-based review. *Crit Care Med*. 2004 Nov;32(11 Suppl):S554-61.
328. Dellinger RP, Levy MM, Rhodes A, Annane D, Gerlach H, Opal SM, et al. Surviving Sepsis Campaign: international guidelines for management of severe sepsis and septic shock, 2012. *Intensive Care Med*. 2013 Feb;39(2):165–228.
329. Rhodes A, Evans LE, Alhazzani W, Levy MM, Antonelli M, Ferrer R, et al. Surviving Sepsis Campaign: International Guidelines for Management of Sepsis and Septic Shock: 2016. *Crit Care Med*. 2017 Mar;45(3):486–552.
330. Nightingale JJ, Burnmeister L, Hopkins D. A national survey of the use of epidural analgesia in patients with sepsis undergoing laparotomy. *Anaesthesia*. 2011 Apr;66(4):311-2
331. Windisch O, Heidegger C-P, Giraud R, Morel P, Buhler L. Thoracic epidural analgesia: a new approach for the treatment of acute pancreatitis? *Crit Care*. 2016 May;20(1):116.
332. Jabaudon M, Chabanne R, Sossou A, Bertrand P-M, Kauffmann S, Chartier C, et al. Epidural analgesia in the intensive care unit: An observational series of 121 patients. *Anaesthesia, Crit care pain Med*. 2015 Aug;34(4):217–23.
333. Süfke, S; Djonlagiæ, H; Kibbel T. Analgesia and Sedation in Severe Sepsis and Septic Shock: A Comparison of Fentanyl/Midazolam vs. Sufentanil/Midazolam. In: Turner, A; Hall J, editor. *Antibiotic Therapy: New developments*. Nova Science

Publishers, Inc; 2013. p. 1–62.

334. Fan E, Del Sorbo L, Goligher EC, Hodgson CL, Munshi L, Walkey AJ, et al. An Official American Thoracic Society/European Society of Intensive Care Medicine/Society of Critical Care Medicine Clinical Practice Guideline: Mechanical Ventilation in Adult Patients with Acute Respiratory Distress Syndrome. *Am J Respir Crit Care Med*. 2017 May;195(9):1253–63.
335. Olafson K, Ramsey CD, Ariano RE, Stasiuk A, Siddiqui F, Wong D, et al. Sedation and analgesia usage in severe pandemic H1N1 (2009) infection: a comparison to respiratory failure secondary to other infectious pneumonias. *Ann Pharmacother*. 2012 Jan;46(1):9–20.
336. Serpa Neto A, Simonis FD, Barbas CS V, Biehl M, Determann RM, Elmer J, et al. Association between tidal volume size, duration of ventilation, and sedation needs in patients without acute respiratory distress syndrome: an individual patient data meta-analysis. *Intensive Care Med*. 2014 Jul;40(7):950–7.
337. Forel J-M, Roch A, Marin V, Michelet P, Demory D, Blache J-L, et al. Neuromuscular blocking agents decrease inflammatory response in patients presenting with acute respiratory distress syndrome. *Crit Care Med*. 2006 Nov;34(11):2749–57.
338. Guervilly C, Bisbal M, Forel JM, Mechat M, Lehingue S, Bourenne J, et al. Effects of neuromuscular blockers on transpulmonary pressures in moderate to severe acute respiratory distress syndrome. *Intensive Care Med*. 2017 Mar;43(3):408–18.
339. Papazian L, Forel J-M, Gacouin A, Penot-Ragon C, Perrin G, Loundou A, et al.

Neuromuscular blockers in early acute respiratory distress syndrome. *N Engl J Med*. 2010 Sep;363(12):1107–16.

340. Soltesz S, Biedler A, Silomon M, Schopflin I, Molter GP. Recovery after remifentanyl and sufentanyl for analgesia and sedation of mechanically ventilated patients after trauma or major surgery. *Br J Anaesth*. 2001 Jun;86(6):763–8.
341. Al MJ, Hakkaart L, Tan SS, Bakker J. Cost-consequence analysis of remifentanyl-based analgo-sedation vs. conventional analgesia and sedation for patients on mechanical ventilation in the Netherlands. *Crit Care*. 2010;14(6):R195.
342. Kim SH, Stoicea N, Soghomonyan S, Bergese SD. Remifentanyl-acute opioid tolerance and opioid-induced hyperalgesia: a systematic review. *Am J Ther*. 2015;22(3):e62-74.
343. Yang DZ, Sin B, Beckhusen J, Xia D, Khaimova R, Iliev I. Opioid-Induced Hyperalgesia in the Nonsurgical Setting: A Systematic Review. *Am J Ther*. 2018 Jan;
344. Shekar K, Roberts JA, McDonald CI, Fisquet S, Barnett AG, Mullany D V, et al. Sequestration of drugs in the circuit may lead to therapeutic failure during extracorporeal membrane oxygenation. *Crit Care*. 2012 Oct;16(5):R194.
345. Shekar K, Roberts JA, Ghassabian S, Mullany D V, Ziegenfuss M, Smith MT, et al. Sedation during extracorporeal membrane oxygenation-why more is less. Vol. 40, *Anaesthesia and intensive care*. Australia; 2012. p. 1067–9.
346. Wagner D, Pasko D, Phillips K, Waldvogel J, Annich G. In vitro clearance of dexmedetomidine in extracorporeal membrane oxygenation. *Perfusion*. 2013

Jan;28(1):40–6.

347. DeGrado JR, Hohlfelder B, Ritchie BM, Anger KE, Reardon DP, Weinhouse GL. Evaluation of sedatives, analgesics, and neuromuscular blocking agents in adults receiving extracorporeal membrane oxygenation. *J Crit Care*. 2017 Feb;37:1–6.
348. Dzierba AL, Brodie D, Bacchetta M, Muir J, Wasson L, Colabraro M, et al. Ketamine use in sedation management in patients receiving extracorporeal membrane oxygenation. Vol. 42, *Intensive care medicine*. United States; 2016. p. 1822–3.
349. Mularski RA, Puntillo K, Varkey B, Erstad BL, Grap MJ, Gilbert HC, et al. Pain management within the palliative and end-of-life care experience in the ICU. *Chest*. 2009 May;135(5):1360–9.
350. Truog RD, Campbell ML, Curtis JR, Haas CE, Luce JM, Rubenfeld GD, et al. Recommendations for end-of-life care in the intensive care unit: a consensus statement by the American College [corrected] of Critical Care Medicine. *Crit Care Med*. 2008 Mar;36(3):953–63.
351. Hawryluck LA, Harvey WR, Lemieux-Charles L, Singer PA. Consensus guidelines on analgesia and sedation in dying intensive care unit patients. *BMC Med Ethics*. 2002 Aug 12;3:E3.
352. Lanken PN, Terry PB, Delisser HM, Fahy BF, Hansen-Flaschen J, Heffner JE, et al. An official American Thoracic Society clinical policy statement: palliative care for patients with respiratory diseases and critical illnesses. *Am J Respir Crit Care Med*. 2008 Apr;177(8):912–27.

353. Downar J, Delaney JW, Hawryluck L, Kenny L. Guidelines for the withdrawal of life-sustaining measures. *Intensive Care Med.* 2016 Jun;42(6):1003–17.
354. Treece PD, Engelberg RA, Crowley L, Chan JD, Rubenfeld GD, Steinberg KP, et al. Evaluation of a standardized order form for the withdrawal of life support in the intensive care unit. *Crit Care Med.* 2004 May;32(5):1141–8.
355. Gaeta S, Price KJ. End-of-life issues in critically ill cancer patients. *Crit Care Clin.* 2010 Jan;26(1):219–27.
356. Mazer MA, Alligood CM, Wu Q. The infusion of opioids during terminal withdrawal of mechanical ventilation in the medical intensive care unit. *J Pain Symptom Manage.* 2011 Jul;42(1):44–51.
357. von Gunten C, Weissman DE. Ventilator withdrawal protocol. *J Palliat Med.* 2003 Oct;6(5):773–4.
358. Zhang Z, Pan L, Ni H. Impact of delirium on clinical outcome in critically ill patients: a meta-analysis. *Gen Hosp Psychiatry.* 2013;35(2):105–11.
359. Gusmao-Flores D, Salluh JIF, Chalhoub RA, Quarantini LC. The confusion assessment method for the intensive care unit (CAM-ICU) and intensive care delirium screening checklist (ICDSC) for the diagnosis of delirium: a systematic review and meta-analysis of clinical studies. *Crit Care.* 2012 Jul;16(4):R115.
360. Van de Meeberg EK, Festen S, Kwant M, Georg RR, Izaks GJ, Ter Maaten JC. Improved detection of delirium, implementation and validation of the CAM-ICU in elderly Emergency Department patients. *Eur J Emerg Med.* 2017 Dec;24(6):411–6.

361. Collinsworth AW, Priest EL, Campbell CR, Vasilevskis EE, Masica AL. A Review of Multifaceted Care Approaches for the Prevention and Mitigation of Delirium in Intensive Care Units. *J Intensive Care Med*. 2016 Feb;31(2):127–41.
362. van Velthuisen EL, Zwakhalen SMG, Warnier RMJ, Mulder WJ, Verhey FRJ, Kempen GIJM. Psychometric properties and feasibility of instruments for the detection of delirium in older hospitalized patients: a systematic review. *Int J Geriatr Psychiatry*. 2016 Sep;31(9):974–89.
363. Luetz A, Weiss B, Boettcher S, Burmeister J, Wernecke K-D, Spies C. Routine delirium monitoring is independently associated with a reduction of hospital mortality in critically ill surgical patients: A prospective, observational cohort study. *J Crit Care*. 2016 Oct;35:168–73.
364. Luther R, McLeod A. The effect of chronotherapy on delirium in critical care - a systematic review. *Nurs Crit Care*. 2018 Nov;23(6):283-290
365. Martinez F, Donoso AM, Marquez C, Labarca E. Implementing a Multicomponent Intervention to Prevent Delirium Among Critically Ill Patients. *Crit Care Nurse*. 2017 Dec;37(6):36–46.
366. Smithburger PL, Korenoski AS, Alexander SA, Kane-Gill SL. Perceptions of Families of Intensive Care Unit Patients Regarding Involvement in Delirium-Prevention Activities: A Qualitative Study. *Crit Care Nurse*. 2017 Dec;37(6):e1–9.
367. Kluger C, Shah P, Maiti S, Babalola O, Mulvany C, Sinvani L. Therapeutic Advances in the Prevention and Treatment of Delirium in the Hospital Setting. *Am J Ther*. 2018;25:e3–14.

368. Abdelgalel EF. Dexmedetomidine versus haloperidol for prevention of delirium during non-invasive mechanical ventilation. *Egypt J Anaesth.* 2016;32(4):473–81.
369. Collet MO, Caballero JJ, Sonnevile R, Bozza FA, Nydahl P, Schandl A, et al. Prevalence and risk factors related to haloperidol use for delirium in adult intensive care patients: the multinational AID-ICU inception cohort study. *Intensive Care Med.* 2018 Jul;44(7):1081–9.
370. Fukata S, Kawabata Y, Fujishiro K, Kitagawa Y, Kuroiwa K, Akiyama H, et al. Haloperidol prophylaxis for preventing aggravation of postoperative delirium in elderly patients: a randomized, open-label prospective trial. *Surg Today.* 2017 Jul;47(7):815–26.
371. van den Boogaard M, Slooter AJC, Bruggemann RJM, Schoonhoven L, Beishuizen A, Vermeijden JW, et al. Effect of Haloperidol on Survival Among Critically Ill Adults With a High Risk of Delirium: The REDUCE Randomized Clinical Trial. *JAMA.* 2018 Feb;319(7):680–90.
372. Bounds M, Kram S, Speroni KG, Brice K, Luschinski MA, Harte S, et al. Effect of ABCDE Bundle Implementation on Prevalence of Delirium in Intensive Care Unit Patients. *Am J Crit Care.* 2016 Nov;25(6):535–44.
373. Carrasco G, Baeza N, Cabre L, Portillo E, Gimeno G, Manzanedo D, et al. Dexmedetomidine for the Treatment of Hyperactive Delirium Refractory to Haloperidol in Nonintubated ICU Patients: A Nonrandomized Controlled Trial. *Crit Care Med.* 2016 Jul;44(7):1295–306.
374. Michaud CJ, Bullard HM, Harris SA, Thomas WL. Impact of Quetiapine Treatment



on Duration of Hypoactive Delirium in Critically Ill Adults: A Retrospective Analysis. *Pharmacotherapy*. 2015;35(8):731–9.

375. Van Den Boogaard M, Pickkers P, Slooter AJC, Kuiper MA, Spronk PE, Van Der Voort PHJ, et al. Development and validation of PRE-DELIRIC (PREdiction of DELIRium in ICu patients) delirium prediction model for intensive care patients: Observational multicentre study. *BMJ*. 2012;344(7845):17.
376. Van Den Boogaard M, Schoonhoven L, Maseda E, Plowright C, Jones C, Luetz A, et al. Recalibration of the delirium prediction model for ICU patients (PRE-DELIRIC): A multinational observational study. *Intensive Care Med*. 2014;40(3):361–9.
377. Wassenaar A, van den Boogaard M, van Achterberg T, Slooter AJC, Kuiper MA, Hoogendoorn ME, et al. Multinational development and validation of an early prediction model for delirium in ICU patients. *Intensive Care Med* [Internet]. 2015;41(6):1048–56. Available from: <http://dx.doi.org/10.1007/s00134-015-3777-2>
378. Wassenaar A, Schoonhoven L, Devlin JW, van Haren FMP, Slooter AJC, Jorens PG, et al. Delirium prediction in the intensive care unit: Comparison of two delirium prediction models. *Crit Care*. 2018;22(1):1–9.
379. Lee A, Mu JL, Joynt GM, Chiu CH, Lai VKW, Gin T, et al. Risk prediction models for delirium in the intensive care unit after cardiac surgery: A systematic review and independent external validation. *Br J Anaesth*. 2017;118(3):391–9.
380. Newman MW, O'Dwyer LC, Rosenthal L. Predicting delirium: A review of risk-stratification models. *Gen Hosp Psychiatry* [Internet]. 2015;37(5):408–13. Available from: <http://dx.doi.org/10.1016/j.genhosppsych.2015.05.003>

381. Inouye SK, Viscoli CM, Horwitz RI, Hurst LD, Tinetti ME. A predictive model for delirium in hospitalized elderly medical patients based on admission characteristics. *Ann Intern Med.* 1993 Sep;119(6):474–81.
382. Douglas VC, Hessler CS, Dhaliwal G, Betjemann JP, Fukuda KA, Alameddine LR, et al. The AWOL tool: Derivation and validation of a delirium prediction rule. *J Hosp Med.* 2013;8(9):493–9.
383. Brown EG, Josephson SA, Anderson N, Reid M, Lee M, Douglas VC. Predicting inpatient delirium: The AWOL delirium risk-stratification score in clinical practice. *Geriatr Nurs (Minneap)* [Internet]. 2017;38(6):567–72. Available from: <https://doi.org/10.1016/j.gerinurse.2017.04.006>
384. Oh SH, Park EJ, Jin Y, Piao J, Lee SM. Automatic delirium prediction system in a Korean surgical intensive care unit. *Nurs Crit Care.* 2014;19(6):281–91.
385. Cho H young, Song X, Piao J, Jin Y, Lee SM. Automatic Delirium Prediction System and Nursing-Sensitive Outcomes in the Medical Intensive Care Unit. *Clin Nurs Res.* 2015;24(1):29–50.
386. National Clinical Guideline Centre. DELIRIUM: Diagnosis, Prevention and Management Clinical Guideline 103. Regent’s Park, London; 2010. p. 1–447.
387. Rudolph JL, Doherty K, Kelly B, Driver JA, Archambault E. Validation of a Delirium Risk Assessment Using Electronic Medical Record Information. *J Am Med Dir Assoc* [Internet]. 2016;17(3):244–8. Available from: <http://dx.doi.org/10.1016/j.jamda.2015.10.020>
388. Halladay CW, Sillner AY, Rudolph JL. Performance of Electronic Prediction Rules

for Prevalent Delirium at Hospital Admission. JAMA Netw Open [Internet].

2018;1(4):e181405–e181405. Available from:

[https://jamanetwork.com/journals/jamanetworkopen/fullarticle/2698080?utm\\_source=silverchair&utm\\_medium=email&utm\\_campaign=article\\_alert-jamanetworkopen&utm\\_content=olf&utm\\_term=082418](https://jamanetwork.com/journals/jamanetworkopen/fullarticle/2698080?utm_source=silverchair&utm_medium=email&utm_campaign=article_alert-jamanetworkopen&utm_content=olf&utm_term=082418)

389. Chen Y, Du H, Wei BH, Chang XN, Dong CM. Development and validation of risk-stratification delirium prediction model for critically ill patients. *Med (United States)*. 2017;96(29).
390. Sakusic A, O'Horo JC, Dziadzko M, Volha D, Ali R, Singh TD, et al. Potentially Modifiable Risk Factors for Long-Term Cognitive Impairment After Critical Illness: A Systematic Review. *Mayo Clin Proc*. 2018 Jan;93(1):68–82.
391. Hopkins RO, Suchyta MR, Snow GL, Jephson A, Weaver LK, Orme JF. Blood glucose dysregulation and cognitive outcome in ARDS survivors. *Brain Inj*. 2010;24(12):1478–84.
392. Davydow DS, Zatzick D, Hough CL, Katon WJ. In-hospital acute stress symptoms are associated with impairment in cognition 1 year after intensive care unit admission. *Ann Am Thorac Soc*. 2013 Oct;10(5):450–7.
393. Pandharipande PP, Girard TD, Jackson JC, Morandi A, Thompson JL, Pun BT, et al. Long-term cognitive impairment after critical illness. *N Engl J Med*. 2013 Oct;369(14):1306–16.
394. Girard TD, Thompson JL, Pandharipande PP, Brummel NE, Jackson JC, Patel MB, et al. Clinical phenotypes of delirium during critical illness and severity of

- subsequent long-term cognitive impairment: a prospective cohort study. *Lancet Respir Med*. 2018 Mar;6(3):213–22.
395. Calsavara AJC, Costa PA, Nobre V, Teixeira AL. Factors Associated With Short and Long Term Cognitive Changes in Patients With Sepsis. *Sci Rep*. 2018 Mar;8(1):4509.
396. Bruck E, Schandl A, Bottai M, Sackey P. The impact of sepsis, delirium, and psychological distress on self-rated cognitive function in ICU survivors-a prospective cohort study. *J intensive care*. 2018 Jan 8;6:2.
397. Karnatovskaia L V, Johnson MM, Benzo RP, Gajic O. The spectrum of psychocognitive morbidity in the critically ill: a review of the literature and call for improvement. *J Crit Care*. 2015 Feb;30(1):130–7.
398. Burtin C, Clerckx B, Robbeets C, Ferdinande P, Langer D, Troosters T, et al. Early exercise in critically ill patients enhances short-term functional recovery. *Crit Care Med*. 2009;37(9):2499–505.
399. Schweickert WD, Pohlman MC, Pohlman AS, Nigos C, Pawlik AJ, Esbrook CL, et al. Early physical and occupational therapy in mechanically ventilated, critically ill patients: a randomised controlled trial. *Lancet*. 2009;373(9678):1874–82.
400. Brummel NE, Girard TD, Ely EW, Pandharipande PP, Morandi A, Hughes CG, et al. Feasibility and safety of early combined cognitive and physical therapy for critically ill medical and surgical patients: the Activity and Cognitive Therapy in ICU (ACT-ICU) trial. *Intensive Care Med*. 2014 Mar;40(3):370–9.
401. Nedergaard HK, Jensen HI, Toft P. Interventions to reduce cognitive impairments

following critical illness: a topical systematic review. *Acta Anaesthesiol Scand*. 2017 Feb;61(2):135-148

402. Chou R, Gordon DB, de Leon-Casasola OA, Rosenberg JM, Bickler S, Brennan T, et al. Management of Postoperative Pain: A Clinical Practice Guideline From the American Pain Society, the American Society of Regional Anesthesia and Pain Medicine, and the American Society of Anesthesiologists' Committee on Regional Anesthesia, Executive Commi. *J Pain*. 2016 Feb;17(2):131–57.
403. Benson GD, Koff RS, Tolman KG. The therapeutic use of acetaminophen in patients with liver disease. *Am J Ther*. 2005;12(2):133–41.
404. Imani F, Motavaf M, Safari S, Alavian SM. The therapeutic use of analgesics in patients with liver cirrhosis: a literature review and evidence-based recommendations. *Hepat Mon*. 2014 Oct;14(10):e23539.
405. Chandok N, Watt KDS. Pain management in the cirrhotic patient: the clinical challenge. *Mayo Clin Proc*. 2010 May;85(5):451–8.
406. Zapater P, Llanos L, Barquero C, Bellot P, Pascual S, Carnicer F, et al. Acute Effects of Dipyrone on Renal Function in Patients with Cirrhosis: A Randomized Controlled Trial. *Basic Clin Pharmacol Toxicol*. 2015 Mar;116(3):257–63.
407. Narváez Tamayo MA, Castañeda de la Lanza C, O Shea Cuevas GJ, Lozano Herrera J, Castañeda Martínez C. Paciente con enfermedad renal: manejo del dolor. *Gac Mex Oncol*. 2015 Nov;14(6):335–41.
408. Sakata RK, Nunes MHG. Analgesics use for kidney failure. *Rev Dor*. 2014;15(3):224–9.

409. Murphy EJ. Acute pain management pharmacology for the patient with concurrent renal or hepatic disease. *Anaesth Intensive Care*. 2005;33(3):311–22.
410. Pham PC, Khaing K, Sievers TM, Pham PM, Miller JM, Pham S V, et al. 2017 update on pain management in patients with chronic kidney disease. *Clin Kidney J*. 2017 Oct;10(5):688–97.
411. Gelzinis TA. An Update on Postoperative Analgesia Following Lung Transplantation. *Journal of cardiothoracic and vascular anesthesia*. United States; 2018.
412. King CS, Valentine V, Cattamanchi A, Franco-Palacios D, Shlobin OA, Brown AW, et al. Early postoperative management after lung transplantation: Results of an international survey. *Clin Transplant*. 2017 Jul;31(7):e12985.
413. Cason M, Naik A, Grimm JC, Hanna D, Faraone L, Brookman JC, et al. The efficacy and safety of epidural-based analgesia in a case series of patients undergoing lung transplantation. *J Cardiothorac Vasc Anesth*. 2015 Feb;29(1):126–32.
414. Hutchins J, Apostolidou I, Shumway S, Kelly R, Wang Q, Foster C, et al. Paravertebral Catheter Use for Postoperative Pain Control in Patients After Lung Transplant Surgery: A Prospective Observational Study. *J Cardiothorac Vasc Anesth*. 2017 Feb;31(1):142–6.
415. Webb CA-J, Weyker PD, Flynn BC. Asystole after orthotopic lung transplantation: examining the interaction of cardiac denervation and dexmedetomidine. *Case Rep Anesthesiol*. 2012;2012:203240.

416. Gucyetmez B, Atalan HK, Aslan S, Yazar S, Polat KY. Effects of Intraoperative Magnesium Sulfate Administration on Postoperative Tramadol Requirement in Liver Transplantation: A Prospective, Double-Blind Study. *Transplant Proc.* 2016 Oct;48(8):2742–6.
417. Milan Z. Analgesia after liver transplantation. *World J Hepatol.* 2015;7(21):2331.
418. Milan ZB, Duncan B, Rewari V, Kocarev M, Collin R. Subcostal Transversus Abdominis Plane Block for Postoperative Analgesia in Liver Transplant Recipients. *Transplant Proc.* 2011 Sep;43(7):2687–90.
419. Covarrubias-gómez A. Manejo del dolor postoperatorio en el enfermo con trasplante renal. *Rev Mex Anesthesiol* [Internet]. 2009;32(S 1):S 148-S 153. Available from: <http://www.medigraphic.com/pdfs/rma/cma-2009/cmas091ak.pdf>
420. Gulyam Kuruba SM, Mukhtar K, Singh SK. A randomised controlled trial of ultrasound-guided transversus abdominis plane block for renal transplantation. *Anaesthesia.* 2014 Nov;69(11):1222–6.
421. Felden L, Walter C, Harder S, Treede RD, Kayser H, Drover D, et al. Comparative clinical effects of hydromorphone and morphine: a meta-analysis. *Br J Anaesth.* 2011 Sep;107(3):319–28.
422. Bakri, Mohamed H. and Ismail, Eman A. and Ibrahim A. Comparison of dexmedetomidine or ondansetron with haloperidol for treatment of postoperative delirium in trauma patients admitted to intensive care unit: randomized controlled trial. *Anaesthesia, Pain Intensive Care* [Internet]. 2015;19(2):118–23. Available from:

<http://search.ebscohost.com/login.aspx?direct=true&db=aph&AN=108877681&site=ehost-live>

423. Walters MK, Farhat J, Bischoff J, Foss M, Evans C. Ketamine as an Analgesic Adjuvant in Adult Trauma Intensive Care Unit Patients With Rib Fracture. *Ann Pharmacother*. 2018 Sep;52(9):849–54.
424. Mahmood S, Parchani A, El-Menyar A, Zarour A, Al-Thani H, Latifi R. Utility of bispectral index in the management of multiple trauma patients. *Surg Neurol Int*. 2014;5:141.
425. Djaiani G, Silverton N, Fedorko L, Carroll J, Styra R, Rao V, et al. Dexmedetomidine versus Propofol Sedation Reduces Delirium after Cardiac Surgery: A Randomized Controlled Trial. *Anesthesiology*. 2016 Feb;124(2):362–8.
426. Cheng H, Li Z, Young N, Boyd D, Atkins Z, Ji F, et al. The Effect of Dexmedetomidine on Outcomes of Cardiac Surgery in Elderly Patients. *J Cardiothorac Vasc Anesth*. 2016 Dec;30(6):1502–8.
427. Dixit D, Endicott J, Burry L, Ramos L, Yeung SYA, Devabhakthuni S, et al. Management of Acute Alcohol Withdrawal Syndrome in Critically Ill Patients. *Pharmacotherapy*. 2016 Jul;36(7):797–822.
428. de Wit M, Jones DG, Sessler CN, Zilberberg MD, Weaver MF. Alcohol-use disorders in the critically ill patient. *Chest*. 2010 Oct;138(4):994–1003.
429. Woods AD, Giometti R, Weeks SM. The use of dexmedetomidine as an adjuvant to benzodiazepine-based therapy to decrease the severity of delirium in alcohol withdrawal in adult intensive care unit patients: a systematic review. *JBIC database*



Syst Rev Implement reports. 2015 Jan;13(1):224–52.

430. Mason BJ, Quello S, Shadan F. Gabapentin for the treatment of alcohol use disorder. *Expert Opin Investig Drugs*. 2018;27(1):113–24.
431. Tetrault JM, O'Connor PG. Substance abuse and withdrawal in the critical care setting. *Crit Care Clin*. 2008;24(4):767–88, viii.
432. Donroe JH, Tetrault JM. Substance Use, Intoxication, and Withdrawal in the Critical Care Setting. *Crit Care Clin*. 2017 Jul;33(3):543–58.
433. Wesson DR, Ling W. The clinical opiate withdrawal scale (COWS). *J Psychoactive Drugs*. 2003;35(2):253–9.
434. National Alliance of Advocates for Buprenorphine Treatment. Clinical Opiate Withdrawal Scale (COWS). *Subst Abus*. 2007;2.
435. Gowing L, Ali R, White J. Buprenorphine for the management of opioid withdrawal. *Cochrane Database Syst Rev*. 2004;(4):CD002025.
436. Gowing L, Farrell M, Ali R, Jm W. Alpha 2 -adrenergic agonists for the management of opioid withdrawal ( Review ). *Library (Lond)*. 2016;(3).
437. Dunn KE, Tompkins DA, Bigelow GE, Strain EC. Efficacy of tramadol extended-release for opioid withdrawal: A randomized clinical trial. *JAMA Psychiatry*. 2017;74(9):885–93.
438. Bonnet U, Preuss U. The cannabis withdrawal syndrome: current insights. *Subst Abuse Rehabil*. 2017;Volume 8:9–37.

**Tabla 1. Nivel de Evidencia y Grado de Recomendación.**

| <b>Nivel de Evidencia</b>   | <b>Descripción e implicaciones</b>                                                                                                              |
|-----------------------------|-------------------------------------------------------------------------------------------------------------------------------------------------|
| Nivel de Evidencia Alto     | Es seguro que el efecto real de la intervención se encuentra cerca al efecto estimado.                                                          |
| Nivel de Evidencia Moderado | Es casi seguro que el efecto real se encuentre cerca al efecto estimado del estudio, pero existe la posibilidad de que el efecto sea diferente. |
| Nivel de Evidencia Bajo     | La certeza del efecto estimado es limitada. El efecto real probablemente es sustancialmente diferente al efecto estimado del estudio.           |
| Nivel de Evidencia Muy Bajo | Existe poca certeza sobre el efecto estimado. El efecto real es sustancialmente diferente al efecto estimado.                                   |

  

| <b>Grado de Recomendación</b> | <b>Descripción</b>                                                                                                                                                                                                 |
|-------------------------------|--------------------------------------------------------------------------------------------------------------------------------------------------------------------------------------------------------------------|
| Recomendación Fuerte          | El escrito presenta certeza de los efectos deseados. La intervención a favor debería ser ofrecida a todos los pacientes, o si es en contra debería no usarse.                                                      |
| Recomendación Condicional     | El escrito concluye que no tiene completa certeza del efecto deseado. La adherencia a esta recomendación probablemente tiene mayor peso en los efectos no deseados, pero no existe certeza suficiente al respecto. |

**Tabla 2. Distribución de las recomendaciones finales según su grado.**

| Grado de recomendación                                        | Número     |
|---------------------------------------------------------------|------------|
| Recomendaciones Fuertes con Nivel de Evidencia Alto           | 6          |
| Recomendaciones Fuertes con Nivel de Evidencia Moderado       | 41         |
| Recomendaciones Fuertes con Nivel de Evidencia Bajo           | 8          |
| Recomendaciones Fuertes con Nivel de Evidencia Muy Bajo       | 0          |
| Recomendaciones Condicionales con Nivel de Evidencia Alto     | 0          |
| Recomendaciones Condicionales con Nivel de Evidencia Moderado | 14         |
| Recomendaciones Condicionales con Nivel de Evidencia Bajo     | 65         |
| Recomendaciones Condicionales con Nivel de Evidencia Muy Bajo | 2          |
| <b>Total</b>                                                  | <b>136</b> |

**Figura 1. Algoritmo terapéutico de dolor torácico propuesto para infarto agudo del miocardio con elevación del segmento ST.**

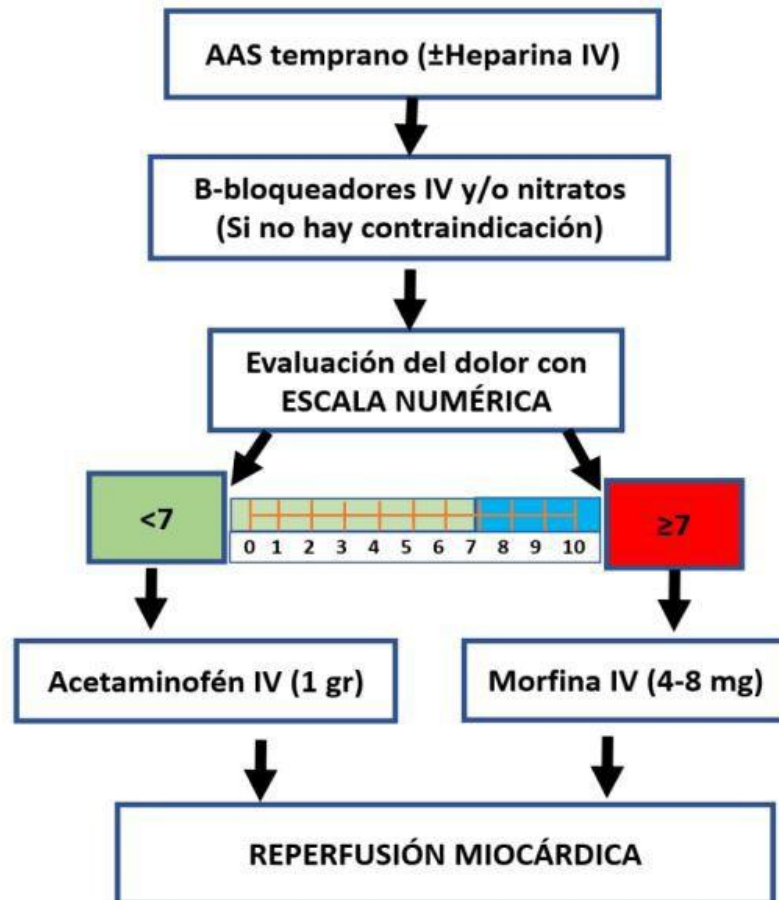

Supplement: mmc1 [file S0210569119301925:mmc1.pdf]
